# Supplementary material for: eIF5A-PEAK1 Signaling Regulates YAP1/TAZ Protein Expression and Pancreatic Cancer Cell Growth
Source: Oxford University Press journal article supplement (doi:10.1158/0008-5472.can-16-2594), 2017-04-05
Supplement: 00085472can162594-sup-172120_1_supp_3756092_rh3y2h.xlsx [file 00085472can162594-sup-172120_1_supp_3756092_rh3y2h.xlsx]

## Sheet: Sheet1
			1st			2nd
Gene_name	prot_desc	prot_mass	shCon	shPeak1	P_value	shCon	shPeak1	P_value
1a	Replicase polyprotein 1a	494583	2	4	0.509253	0	0	0.991956
A2M	Alpha-2-macroglobulin	164613	3	0	0.0961434	0	0	0.991956
AAAS	Aladin	60429	2	5	0.333967	3	0	0.10741
AACS	Acetoacetyl-CoA synthetase	75666	5	0	0.0216916	0	0	0.991956
AAK1	AP2-associated protein kinase 1	104562	2	3	0.752754	4	2	0.430858
AAMP	Angio-associated migratory cell protein	47435	5	10	0.267975	1	0	0.460938
AARS	Alanine--tRNA ligase, cytoplasmic	107484	50	58	0.715667	39	42	0.810293
AARSD1	Alanyl-tRNA editing protein Aarsd1	45821	0	2	0.253175	0	0	0.991956
AASDH	Acyl-CoA synthetase family member 4	124593	3	0	0.0961434	0	0	0.991956
ABCA12	ATP-binding cassette sub-family A member 12	295572	2	0	0.203895	0	0	0.991956
ABCA13	ATP-binding cassette sub-family A member 13	580888	2	0	0.203895	0	0	0.991956
ABCB1	Multidrug resistance protein 1	141876	0	2	0.253175	0	0	0.991956
ABCB6	ATP-binding cassette sub-family B member 6, mitochondrial	94396	0	2	0.253175	0	2	0.234147
ABCC1	Multidrug resistance-associated protein 1	172907	1	2	0.670103	0	0	0.991956
ABCC13	Putative ATP-binding cassette sub-family C member 13	31401	2	0	0.203895	0	0	0.991956
ABCD3	ATP-binding cassette sub-family D member 3	75941	0	2	0.253175	13	2	0.00348309
ABCE1	ATP-binding cassette sub-family E member 1	68240	0	4	0.0660111	9	5	0.281079
ABCF1	ATP-binding cassette sub-family F member 1	96323	29	18	0.0627455	28	18	0.125249
ABCF3	ATP-binding cassette sub-family F member 3	80094	2	0	0.203895	2	0	0.221265
ABHD10	Mycophenolic acid acyl-glucuronide esterase, mitochondrial	34274	6	24	0.00175088	2	5	0.295743
ABHD11	Alpha/beta hydrolase domain-containing protein 11	34747	3	16	0.00418034	2	3	0.700557
ABHD14B	Alpha/beta hydrolase domain-containing protein 14B	22460	10	18	0.197361	2	0	0.221265
ABR	Active breakpoint cluster region-related protein	98106	1	1	0.946744	0	1	0.478059
ACAA1	3-ketoacyl-CoA thiolase, peroxisomal	44862	3	0	0.0961434	1	2	0.629371
ACACA	Acetyl-CoA carboxylase 1	267095	42	29	0.0624903	27	20	0.279296
ACAD8	Isobutyryl-CoA dehydrogenase, mitochondrial	45925	2	0	0.203895	1	0	0.460938
ACAD9	Acyl-CoA dehydrogenase family member 9, mitochondrial	69387	2	2	0.931281	10	3	0.0510904
ACADVL	Very long-chain specific acyl-CoA dehydrogenase, mitochondrial	70789	35	27	0.188484	74	40	0.000960989
ACAP2	Arf-GAP with coiled-coil, ANK repeat and PH domain-containing protein 2	88943	7	9	0.743765	12	8	0.35673
ACAT2	Acetyl-CoA acetyltransferase, cytosolic	41864	0	4	0.0660111	0	0	0.991956
ACBD3	Golgi resident protein GCP60	60841	19	19	0.809683	19	34	0.0475731
ACIN1	Apoptotic chromatin condensation inducer in the nucleus	152170	17	14	0.45399	14	10	0.394197
ACLY	ATP-citrate synthase	121674	25	28	0.900455	23	22	0.829124
ACMSD	2-amino-3-carboxymuconate-6-semialdehyde decarboxylase	38410	5	2	0.237346	0	0	0.991956
ACO1	Cytoplasmic aconitate hydratase	98850	16	20	0.671587	24	29	0.543935
ACO2	Aconitate hydratase, mitochondrial	86113	49	77	0.0391757	42	83	0.00035159
ACOT13	Acyl-coenzyme A thioesterase 13	15074	2	0	0.203895	0	0	0.991956
ACOX1	Peroxisomal acyl-coenzyme A oxidase 1	74936	5	8	0.508441	5	1	0.113032
ACOX3	Peroxisomal acyl-coenzyme A oxidase 3	78370	0	3	0.128913	0	0	0.991956
ACOXL	Acyl-coenzyme A oxidase-like protein	62383	2	0	0.203895	0	0	0.991956
ACP1	Low molecular weight phosphotyrosine protein phosphatase	18499	21	68	2.31804e-06	1	5	0.125283
ACSF2	Acyl-CoA synthetase family member 2, mitochondrial	69037	2	3	0.752754	5	0	0.025684
ACSL1	Long-chain-fatty-acid--CoA ligase 1	78969	3	0	0.0961434	3	0	0.10741
ACSL3	Long-chain-fatty-acid--CoA ligase 3	81338	51	55	0.990361	40	49	0.39315
ACSL4	Long-chain-fatty-acid--CoA ligase 4	80220	8	5	0.342753	11	10	0.794463
ACSL5	Long-chain-fatty-acid--CoA ligase 5	76903	0	3	0.128913	10	4	0.107473
ACSL6	Long-chain-fatty-acid--CoA ligase 6	78728	4	0	0.0455913	0	0	0.991956
ACSS1	Acetyl-coenzyme A synthetase 2-like, mitochondrial	75712	5	0	0.0216916	1	0	0.460938
ACTB	Actin, cytoplasmic 1	42052	100	92	0.266273	131	61	1.64759e-07
ACTBL2	Beta-actin-like protein 2	42318	15	0	1.36915e-05	0	0	0.991956
ACTL6A	Actin-like protein 6A	47974	6	2	0.141329	6	0	0.012608
ACTN1	Alpha-actinin-1	103563	143	153	0.932928	128	150	0.250356
ACTN4	Alpha-actinin-4	105245	220	241	0.881927	197	233	0.127035
ACTR3	Actin-related protein 3	47827	18	32	0.0891958	19	15	0.461457
ACY1	Aminoacylase-1	46113	2	6	0.21368	0	2	0.234147
ADAM10	Disintegrin and metalloproteinase domain-containing protein 10	86195	2	9	0.0502935	3	2	0.664401
ADAM9	Disintegrin and metalloproteinase domain-containing protein 9	93065	2	0	0.203895	4	0	0.0524359
ADAMTS15	A disintegrin and metalloproteinase with thrombospondin motifs 15	105967	2	0	0.203895	0	0	0.991956
ADAMTS5	A disintegrin and metalloproteinase with thrombospondin motifs 5	104113	0	6	0.0174636	0	0	0.991956
ADAR	Double-stranded RNA-specific adenosine deaminase	137178	9	3	0.0668308	6	4	0.523438
ADCY3	Adenylate cyclase type 3	130157	4	0	0.0455913	0	0	0.991956
ADCY8	Adenylate cyclase type 8	141433	0	4	0.0660111	0	0	0.991956
ADD1	Alpha-adducin	81304	3	0	0.0961434	1	0	0.460938
ADD3	Gamma-adducin	79447	6	5	0.672739	5	4	0.727577
ADH5	Alcohol dehydrogenase class-3	40580	7	16	0.0942429	7	0	0.00619857
ADIRF	Adipogenesis regulatory factor	7855	1	8	0.027112	0	0	0.991956
ADPGK	ADP-dependent glucokinase	54397	4	5	0.845642	5	6	0.799542
ADRBK1	Beta-adrenergic receptor kinase 1	80321	9	2	0.0266771	9	0	0.00150284
ADSL	Adenylosuccinate lyase	55630	10	7	0.383164	9	4	0.164977
ADSS	Adenylosuccinate synthetase isozyme 2	50465	7	10	0.585331	4	5	0.77592
AFAP1L1	Actin filament-associated protein 1-like 1	87515	0	4	0.0660111	0	0	0.991956
AFG3L2	AFG3-like protein 2	88984	5	1	0.0973209	5	0	0.025684
AGBL3	Cytosolic carboxypeptidase 3	117208	4	0	0.0455913	0	0	0.991956
AGFG2	Arf-GAP domain and FG repeat-containing protein 2	49362	2	0	0.203895	1	0	0.460938
AGL	Glycogen debranching enzyme	176819	22	22	0.795868	11	14	0.590813
AGO2	Protein argonaute-2	98400	1	2	0.670103	0	2	0.234147
AGPS	Alkyldihydroxyacetonephosphate synthase, peroxisomal	73710	19	15	0.365546	17	20	0.670979
AGR2	Anterior gradient protein 2 homolog	20036	7	32	0.000108853	0	0	0.991956
AGRN	Agrin	225246	0	2	0.253175	1	2	0.629371
AGTRAP	Type-1 angiotensin II receptor-associated protein	17590	3	0	0.0961434	2	0	0.221265
AGXT2L1	Ethanolamine-phosphate phospho-lyase	56298	3	0	0.0961434	0	0	0.991956
AHCTF1	Protein ELYS	254223	0	6	0.0174636	0	3	0.115969
AHCY	Adenosylhomocysteinase	48255	27	20	0.200897	29	8	0.000363687
AHCYL1	Putative adenosylhomocysteinase 2	60035	3	0	0.0961434	0	0	0.991956
AHNAK	Neuroblast differentiation-associated protein AHNAK	629213	779	678	3.81444e-05	579	478	0.00059212
AHNAK2	Protein AHNAK2	617763	0	8	0.00464976	0	0	0.991956
AHSA1	Activator of 90 kDa heat shock protein ATPase homolog 1	38421	2	1	0.562287	4	1	0.201586
AHSG	Alpha-2-HS-glycoprotein	40123	0	2	0.253175	0	0	0.991956
AIFM1	Apoptosis-inducing factor 1, mitochondrial	67144	3	0	0.0961434	12	1	0.00148482
AIM1	Absent in melanoma 1 protein	190097	8	3	0.11017	5	4	0.727577
AIMP1	Aminoacyl tRNA synthase complex-interacting multifunctional protein 1	34638	3	8	0.182101	2	1	0.601165
AIMP2	Aminoacyl tRNA synthase complex-interacting multifunctional protein 2	35691	3	0	0.0961434	1	0	0.460938
AIP	AH receptor-interacting protein	38092	3	4	0.806359	3	0	0.10741
AK1	Adenylate kinase isoenzyme 1	21749	8	16	0.154662	1	0	0.460938
AK2	Adenylate kinase 2, mitochondrial	26706	24	32	0.440805	8	1	0.0184709
AK3	GTP:AMP phosphotransferase AK3, mitochondrial	25565	17	30	0.104613	13	0	8.89649e-05
AK4	GTP:AMP phosphotransferase AK4, mitochondrial	25382	4	6	0.633198	0	0	0.991956
AKAP12	A-kinase anchor protein 12	191937	7	0	0.00493923	5	0	0.025684
AKAP13	A-kinase anchor protein 13	310381	18	0	1.5125e-06	11	0	0.000365337
AKAP9	A-kinase anchor protein 9	455725	2	6	0.21368	1	0	0.460938
AKD1	Adenylate kinase domain-containing protein 1	222836	1	3	0.410972	0	0	0.991956
AKR1A1	Alcohol dehydrogenase [NADP(+)]	36915	8	6	0.505175	1	1	0.986068
AKR1B1	Aldose reductase	36252	8	12	0.484259	3	3	0.978719
AKR1C3	Aldo-keto reductase family 1 member C3	37252	9	22	0.0342568	3	6	0.355273
AKR1D1	3-oxo-5-beta-steroid 4-dehydrogenase	37719	2	0	0.203895	1	0	0.460938
AKR7A2	Aflatoxin B1 aldehyde reductase member 2	40045	8	10	0.770768	8	4	0.248282
AKT1	RAC-alpha serine/threonine-protein kinase	56085	0	6	0.0174636	0	0	0.991956
AKT1S1	Proline-rich AKT1 substrate 1	27595	0	2	0.253175	0	0	0.991956
ALCAM	CD166 antigen	65745	6	1	0.0522825	1	6	0.0705961
ALDH18A1	Delta-1-pyrroline-5-carboxylate synthase	87989	2	3	0.752754	2	1	0.601165
ALDH1A2	Retinal dehydrogenase 2	57180	42	20	0.00190636	58	14	6.15656e-08
ALDH1A3	Aldehyde dehydrogenase family 1 member A3	56907	32	33	0.849164	22	17	0.39239
ALDH1B1	Aldehyde dehydrogenase X, mitochondrial	57662	14	20	0.429975	15	11	0.410214
ALDH1L1	Cytosolic 10-formyltetrahydrofolate dehydrogenase	99622	45	41	0.430336	39	39	0.928597
ALDH2	Aldehyde dehydrogenase, mitochondrial	56894	0	5	0.0339154	1	0	0.460938
ALDH3A1	Aldehyde dehydrogenase, dimeric NADP-preferring	50794	7	7	0.88127	6	2	0.16552
ALDH3A2	Fatty aldehyde dehydrogenase	55304	8	17	0.11204	27	22	0.436018
ALDH3B1	Aldehyde dehydrogenase family 3 member B1	52467	2	3	0.752754	0	4	0.0577624
ALDH4A1	Delta-1-pyrroline-5-carboxylate dehydrogenase, mitochondrial	62175	0	2	0.253175	0	2	0.234147
ALDH5A1	Succinate-semialdehyde dehydrogenase, mitochondrial	58070	8	3	0.11017	5	0	0.025684
ALDH6A1	Methylmalonate-semialdehyde dehydrogenase [acylating], mitochondrial	58296	3	10	0.076226	4	7	0.403207
ALDH7A1	Alpha-aminoadipic semialdehyde dehydrogenase	59057	35	34	0.658353	28	15	0.0412566
ALDH9A1	4-trimethylaminobutyraldehyde dehydrogenase	54714	17	21	0.688765	11	10	0.794463
ALDOA	Fructose-bisphosphate aldolase A	39851	37	37	0.738396	82	22	8.37978e-10
ALDOC	Fructose-bisphosphate aldolase C	39830	11	7	0.27629	23	9	0.0113006
ALG1	Chitobiosyldiphosphodolichol beta-mannosyltransferase	53316	2	0	0.203895	0	0	0.991956
ALG5	Dolichyl-phosphate beta-glucosyltransferase	37174	3	0	0.0961434	0	0	0.991956
ALK	ALK tyrosine kinase receptor	178665	6	0	0.010343	2	0	0.221265
ALKBH7	Alpha-ketoglutarate-dependent dioxygenase alkB homolog 7	24687	2	0	0.203895	0	0	0.991956
ALMS1	Alstrom syndrome protein 1	463355	4	1	0.178498	1	0	0.460938
ALOX5	Arachidonate 5-lipoxygenase	78675	5	7	0.676604	7	10	0.505352
ALS2	Alsin	185457	2	0	0.203895	0	0	0.991956
ALYREF	THO complex subunit 4	26888	6	20	0.0102794	0	6	0.0144581
AMFR	E3 ubiquitin-protein ligase AMFR	73794	2	1	0.562287	0	0	0.991956
AMOT	Angiomotin	118540	0	2	0.253175	0	0	0.991956
ANAPC1	Anaphase-promoting complex subunit 1	218528	2	3	0.752754	2	3	0.700557
ANK3	Ankyrin-3	482394	5	2	0.237346	0	1	0.478059
ANKFY1	Ankyrin repeat and FYVE domain-containing protein 1	129915	4	0	0.0455913	4	0	0.0524359
ANKHD1	Ankyrin repeat and KH domain-containing protein 1	271286	3	7	0.274076	3	17	0.00164522
ANKMY1	Ankyrin repeat and MYND domain-containing protein 1	107169	2	0	0.203895	0	0	0.991956
ANKRD17	Ankyrin repeat domain-containing protein 17	275970	3	5	0.579351	2	0	0.221265
ANKRD18A	Ankyrin repeat domain-containing protein 18A	116623	15	42	0.000876843	8	3	0.13359
ANKRD20A5P	Putative ankyrin repeat domain-containing protein 20A5	18731	3	0	0.0961434	0	0	0.991956
ANKRD22	Ankyrin repeat domain-containing protein 22	22248	0	12	0.000332666	0	0	0.991956
ANKRD28	Serine/threonine-protein phosphatase 6 regulatory ankyrin repeat subunit A	114605	4	3	0.643368	2	7	0.112665
ANKRD30B	Ankyrin repeat domain-containing protein 30B	159587	3	0	0.0961434	0	0	0.991956
ANKRD34C	Ankyrin repeat domain-containing protein 34C	58619	0	2	0.253175	0	0	0.991956
ANKRD6	Ankyrin repeat domain-containing protein 6	80826	2	0	0.203895	0	0	0.991956
ANP32A	Acidic leucine-rich nuclear phosphoprotein 32 family member A	28699	27	60	0.00135357	14	8	0.191402
ANP32B	Acidic leucine-rich nuclear phosphoprotein 32 family member B	28959	23	72	2.00374e-06	11	16	0.371186
ANP32E	Acidic leucine-rich nuclear phosphoprotein 32 family member E	30920	5	18	0.0109889	4	3	0.702092
ANXA1	Annexin A1	38942	96	91	0.371606	100	23	3.24069e-13
ANXA10	Annexin A10	37848	2	4	0.509253	0	2	0.234147
ANXA11	Annexin A11	54731	56	54	0.551074	68	26	7.41607e-06
ANXA2	Annexin A2	38808	172	165	0.275807	137	92	0.00175257
ANXA3	Annexin A3	36546	50	42	0.229421	37	13	0.000467229
ANXA4	Annexin A4	36111	97	126	0.172493	77	4	3.2424e-19
ANXA5	Annexin A5	35993	68	130	9.90224e-05	49	5	1.25341e-10
ANXA6	Annexin A6	76215	14	0	2.85452e-05	7	0	0.00619857
ANXA7	Annexin A7	53024	13	17	0.613493	9	7	0.598084
AP1B1	AP-1 complex subunit beta-1	105482	7	0	0.00493923	5	0	0.025684
AP1G1	AP-1 complex subunit gamma-1	92148	10	4	0.0856851	5	0	0.025684
AP1M1	AP-1 complex subunit mu-1	48757	0	2	0.253175	0	2	0.234147
AP1M2	AP-1 complex subunit mu-2	48222	7	3	0.178108	4	2	0.430858
AP2A1	AP-2 complex subunit alpha-1	108561	19	0	7.25948e-07	14	1	0.000409501
AP2A2	AP-2 complex subunit alpha-2	104807	17	7	0.0265059	17	15	0.684622
AP2B1	AP-2 complex subunit beta	105398	0	6	0.0174636	0	4	0.0577624
AP2M1	AP-2 complex subunit mu	49996	12	10	0.547057	6	0	0.012608
AP3B1	AP-3 complex subunit beta-1	121815	9	11	0.794686	5	6	0.799542
AP3D1	AP-3 complex subunit delta-1	131159	2	7	0.134011	1	6	0.0705961
AP3S1	AP-3 complex subunit sigma-1	21960	0	4	0.0660111	0	0	0.991956
APC	Adenomatous polyposis coli protein	313810	0	3	0.128913	0	0	0.991956
APEH	Acylamino-acid-releasing enzyme	82142	27	16	0.0546298	26	25	0.832591
APEX1	DNA-(apurinic or apyrimidinic site) lyase	35953	13	40	0.000497432	8	4	0.248282
API5	Apoptosis inhibitor 5	59346	12	8	0.292873	13	0	8.89649e-05
APMAP	Adipocyte plasma membrane-associated protein	46651	12	4	0.032726	7	2	0.0992174
APOA1BP	NAD(P)H-hydrate epimerase	32017	7	18	0.0456669	2	1	0.601165
APOB	Apolipoprotein B-100	516651	6	8	0.712803	0	0	0.991956
APRT	Adenine phosphoribosyltransferase	19779	8	22	0.0187638	0	0	0.991956
AQR	Intron-binding protein aquarius	172270	4	10	0.154427	2	10	0.0234685
ARAP1	Arf-GAP with Rho-GAP domain, ANK repeat and PH domain-containing protein 1	163743	15	10	0.238082	9	6	0.428104
ARAP3	Arf-GAP with Rho-GAP domain, ANK repeat and PH domain-containing protein 3	171505	0	5	0.0339154	0	4	0.0577624
ARCN1	Coatomer subunit delta	57630	47	31	0.0316983	37	15	0.00168611
ARF1	ADP-ribosylation factor 1	20754	23	38	0.106835	8	9	0.846958
ARF4	ADP-ribosylation factor 4	20625	10	14	0.54225	0	1	0.478059
ARF5	ADP-ribosylation factor 5	20644	10	28	0.00689319	0	5	0.0288671
ARF6	ADP-ribosylation factor 6	20196	4	26	7.65219e-05	0	4	0.0577624
ARFGEF1	Brefeldin A-inhibited guanine nucleotide-exchange protein 1	210858	16	7	0.0406904	9	0	0.00150284
ARFGEF2	Brefeldin A-inhibited guanine nucleotide-exchange protein 2	204418	18	10	0.0887988	10	14	0.452395
ARFGEF3	Brefeldin A-inhibited guanine nucleotide-exchange protein 3	243862	11	8	0.398495	6	7	0.818348
ARFIP1	Arfaptin-1	41795	0	3	0.128913	0	0	0.991956
ARHGAP1	Rho GTPase-activating protein 1	50492	12	25	0.0580525	7	11	0.380306
ARHGAP18	Rho GTPase-activating protein 18	75215	8	8	0.873664	5	9	0.317177
ARHGAP23	Rho GTPase-activating protein 23	163347	2	0	0.203895	0	0	0.991956
ARHGAP27	Rho GTPase-activating protein 27	99019	2	0	0.203895	1	0	0.460938
ARHGAP29	Rho GTPase-activating protein 29	143514	2	0	0.203895	2	0	0.221265
ARHGAP35	Rho GTPase-activating protein 35	171946	13	6	0.0796337	9	6	0.428104
ARHGAP5	Rho GTPase-activating protein 5	173834	11	7	0.27629	9	6	0.428104
ARHGDIA	Rho GDP-dissociation inhibitor 1	23264	25	48	0.0179164	10	3	0.0510904
ARHGDIB	Rho GDP-dissociation inhibitor 2	23045	10	22	0.0581738	8	0	0.00305084
ARHGEF1	Rho guanine nucleotide exchange factor 1	103056	2	2	0.931281	2	3	0.700557
ARHGEF11	Rho guanine nucleotide exchange factor 11	168456	3	0	0.0961434	1	0	0.460938
ARHGEF12	Rho guanine nucleotide exchange factor 12	174094	6	4	0.463969	1	1	0.986068
ARHGEF17	Rho guanine nucleotide exchange factor 17	223781	0	4	0.0660111	0	0	0.991956
ARHGEF2	Rho guanine nucleotide exchange factor 2	112386	4	8	0.326748	0	0	0.991956
ARHGEF6	Rho guanine nucleotide exchange factor 6	88753	3	10	0.076226	0	0	0.991956
ARHGEF9	Rho guanine nucleotide exchange factor 9	61552	3	0	0.0961434	0	0	0.991956
ARID1A	AT-rich interactive domain-containing protein 1A	242805	0	3	0.128913	0	1	0.478059
ARID3B	AT-rich interactive domain-containing protein 3B	60750	4	0	0.0455913	0	0	0.991956
ARL1	ADP-ribosylation factor-like protein 1	20531	3	10	0.076226	0	0	0.991956
ARL2	ADP-ribosylation factor-like protein 2	21049	14	16	0.884919	1	1	0.986068
ARL3	ADP-ribosylation factor-like protein 3	20626	3	14	0.0114261	0	0	0.991956
ARL6IP5	PRA1 family protein 3	21614	8	16	0.154662	4	1	0.201586
ARL8A	ADP-ribosylation factor-like protein 8A	21644	5	12	0.13087	0	0	0.991956
ARL8B	ADP-ribosylation factor-like protein 8B	21767	0	20	1.72889e-06	0	0	0.991956
ARMCX2	Armadillo repeat-containing X-linked protein 2	65968	3	0	0.0961434	0	0	0.991956
ARPC1A	Actin-related protein 2/3 complex subunit 1A	42139	3	8	0.182101	3	4	0.744772
ARPC1B	Actin-related protein 2/3 complex subunit 1B	41722	30	21	0.126321	13	3	0.0108906
ARPC2	Actin-related protein 2/3 complex subunit 2	34447	41	66	0.0435993	25	0	1.8857e-08
ARPC3	Actin-related protein 2/3 complex subunit 3	20775	4	19	0.00272063	0	1	0.478059
ARPC4	Actin-related protein 2/3 complex subunit 4	19781	19	34	0.0761504	0	2	0.234147
ARPC5	Actin-related protein 2/3 complex subunit 5	16377	8	14	0.282537	3	0	0.10741
ARPC5L	Actin-related protein 2/3 complex subunit 5-like protein	16941	12	16	0.591465	7	0	0.00619857
ARRB1	Beta-arrestin-1	47464	10	14	0.54225	0	3	0.115969
ASAH1	Acid ceramidase	45116	2	3	0.752754	0	4	0.0577624
ASCC3	Activating signal cointegrator 1 complex subunit 3	252898	7	2	0.0824056	5	2	0.270486
ASH2L	Set1/Ash2 histone methyltransferase complex subunit ASH2	69307	0	2	0.253175	3	3	0.978719
ASL	Argininosuccinate lyase	51943	3	5	0.579351	2	3	0.700557
ASNA1	ATPase ASNA1	39249	2	0	0.203895	1	0	0.460938
ASPH	Aspartyl/asparaginyl beta-hydroxylase	86266	20	30	0.25827	12	18	0.305319
ASPM	Abnormal spindle-like microcephaly-associated protein	413447	2	0	0.203895	0	0	0.991956
ASS1	Argininosuccinate synthase	46815	11	17	0.362074	9	10	0.85827
ASXL3	Putative Polycomb group protein ASXL3	244483	0	4	0.0660111	0	0	0.991956
ATAD2	ATPase family AAA domain-containing protein 2	159825	0	3	0.128913	0	0	0.991956
ATAD3A	ATPase family AAA domain-containing protein 3A	71610	8	0	0.00236129	7	0	0.00619857
ATG13	Autophagy-related protein 13	57085	2	3	0.752754	2	1	0.601165
ATG3	Ubiquitin-like-conjugating enzyme ATG3	36320	5	0	0.0216916	0	0	0.991956
ATG5	Autophagy protein 5	32675	5	1	0.0973209	2	1	0.601165
ATIC	Bifunctional purine biosynthesis protein PURH	65129	2	0	0.203895	169	19	3.32829e-32
ATL3	Atlastin-3	60998	4	4	0.907895	0	4	0.0577624
ATM	Serine-protein kinase ATM	355564	13	8	0.210969	6	3	0.323307
ATP1A1	Sodium/potassium-transporting ATPase subunit alpha-1	114135	68	63	0.37977	90	95	0.818751
ATP1B1	Sodium/potassium-transporting ATPase subunit beta-1	35460	9	4	0.135155	10	1	0.00529524
ATP1B3	Sodium/potassium-transporting ATPase subunit beta-3	31855	5	4	0.66111	0	0	0.991956
ATP2A2	Sarcoplasmic/endoplasmic reticulum calcium ATPase 2	116336	22	45	0.012336	19	45	0.0014204
ATP2B1	Plasma membrane calcium-transporting ATPase 1	139637	14	7	0.0919926	10	5	0.193413
ATP2B4	Plasma membrane calcium-transporting ATPase 4	139030	0	8	0.00464976	0	7	0.00725246
ATP4A	Potassium-transporting ATPase alpha chain 1	115756	4	3	0.643368	0	0	0.991956
ATP5A1	ATP synthase subunit alpha, mitochondrial	59828	60	72	0.550559	69	45	0.0185725
ATP5B	ATP synthase subunit beta, mitochondrial	56559	62	63	0.731008	68	32	0.000197535
ATP5C1	ATP synthase subunit gamma, mitochondrial	33053	3	10	0.076226	3	0	0.10741
ATP5D	ATP synthase subunit delta, mitochondrial	17490	2	6	0.21368	2	0	0.221265
ATP5F1	ATP synthase subunit b, mitochondrial	28965	3	16	0.00418034	0	0	0.991956
ATP5H	ATP synthase subunit d, mitochondrial	18548	2	0	0.203895	0	0	0.991956
ATP5J	ATP synthase-coupling factor 6, mitochondrial	12587	0	2	0.253175	0	0	0.991956
ATP5O	ATP synthase subunit O, mitochondrial	23391	9	18	0.130022	0	0	0.991956
ATP5S	ATP synthase subunit s, mitochondrial	25493	0	2	0.253175	0	0	0.991956
ATP6V1A	V-type proton ATPase catalytic subunit A	68703	20	13	0.153001	9	9	0.964947
ATP6V1B2	V-type proton ATPase subunit B, brain isoform	56842	7	9	0.743765	8	4	0.248282
ATP6V1E1	V-type proton ATPase subunit E 1	26202	0	2	0.253175	0	1	0.478059
ATP6V1F	V-type proton ATPase subunit F	13370	1	4	0.245759	0	0	0.991956
ATP6V1G1	V-type proton ATPase subunit G 1	13871	2	0	0.203895	0	0	0.991956
ATPAF1	ATP synthase mitochondrial F1 complex assembly factor 1	36778	3	6	0.403636	0	2	0.234147
ATR	Serine/threonine-protein kinase ATR	304957	2	0	0.203895	0	0	0.991956
ATRX	Transcriptional regulator ATRX	285036	2	0	0.203895	0	0	0.991956
ATXN10	Ataxin-10	54196	8	6	0.505175	6	2	0.16552
ATXN2L	Ataxin-2-like protein	113589	1	3	0.410972	0	0	0.991956
B3GALNT1	UDP-GalNAc:beta-1,3-N-acetylgalactosaminyltransferase 1	39854	2	0	0.203895	0	0	0.991956
B3GALT6	Beta-1,3-galactosyltransferase 6	37537	0	2	0.253175	0	1	0.478059
B4GALNT2	Beta-1,4 N-acetylgalactosaminyltransferase 2	63771	0	2	0.253175	0	0	0.991956
B4GALT5	Beta-1,4-galactosyltransferase 5	45346	5	3	0.432598	1	0	0.460938
BABAM1	BRISC and BRCA1-A complex member 1	37073	7	14	0.184723	12	9	0.491566
BAG2	BAG family molecular chaperone regulator 2	23943	3	4	0.806359	0	0	0.991956
BAG3	BAG family molecular chaperone regulator 3	61728	3	2	0.614615	4	2	0.430858
BAG6	Large proline-rich protein BAG6	119790	16	15	0.69288	8	8	0.966842
BAI1	Brain-specific angiogenesis inhibitor 1	176979	4	0	0.0455913	0	1	0.478059
BAIAP2	Brain-specific angiogenesis inhibitor 1-associated protein 2	61152	2	0	0.203895	0	0	0.991956
BAX	Apoptosis regulator BAX	21298	0	8	0.00464976	0	2	0.234147
BAZ1A	Bromodomain adjacent to zinc finger domain protein 1A	180246	0	2	0.253175	0	0	0.991956
BAZ1B	Tyrosine-protein kinase BAZ1B	172392	4	4	0.907895	2	2	0.982014
BCAP31	B-cell receptor-associated protein 31	28048	2	0	0.203895	0	0	0.991956
BCAS2	Pre-mRNA-splicing factor SPF27	26245	2	6	0.21368	2	0	0.221265
BCAS3	Breast carcinoma-amplified sequence 3	102548	3	4	0.806359	0	0	0.991956
BCAT1	Branched-chain-amino-acid aminotransferase, cytosolic	43536	4	4	0.907895	0	0	0.991956
BCAT2	Branched-chain-amino-acid aminotransferase, mitochondrial	44687	2	0	0.203895	0	0	0.991956
BCL2L1	Bcl-2-like protein 1	26106	3	0	0.0961434	0	0	0.991956
BCL2L13	Bcl-2-like protein 13	52837	4	2	0.388333	0	0	0.991956
BCL9L	B-cell CLL/lymphoma 9-like protein	157427	3	0	0.0961434	2	0	0.221265
BCOR	BCL-6 corepressor	193727	3	4	0.806359	0	0	0.991956
BCR	Breakpoint cluster region protein	143756	0	2	0.253175	0	0	0.991956
BDH1	D-beta-hydroxybutyrate dehydrogenase, mitochondrial	38556	4	6	0.633198	2	0	0.221265
BECN1	Beclin-1	52409	1	2	0.670103	2	0	0.221265
BID	BH3-interacting domain death agonist	22166	5	30	3.27376e-05	5	5	0.973325
BIN1	Myc box-dependent-interacting protein 1	64927	3	2	0.614615	4	0	0.0524359
BIRC6	Baculoviral IAP repeat-containing protein 6	536192	24	11	0.0155016	17	8	0.0665993
BLM	Bloom syndrome protein	160611	4	0	0.0455913	3	0	0.10741
BLMH	Bleomycin hydrolase	53189	4	3	0.643368	4	0	0.0524359
BLVRA	Biliverdin reductase A	33713	2	0	0.203895	1	0	0.460938
BLVRB	Flavin reductase (NADPH)	22233	4	16	0.0114417	0	1	0.478059
BMS1	Ribosome biogenesis protein BMS1 homolog	146571	7	4	0.315556	8	4	0.248282
BNIP1	Vesicle transport protein SEC20	26303	3	0	0.0961434	2	0	0.221265
BOD1L1	Biorientation of chromosomes in cell division protein 1-like 1	332433	7	2	0.0824056	4	0	0.0524359
BOLA2	BolA-like protein 2	10288	4	4	0.907895	0	0	0.991956
BOP1	Ribosome biogenesis protein BOP1	84313	2	0	0.203895	0	0	0.991956
BPNT1	3~(2~),5~-bisphosphate nucleotidase 1	33734	2	4	0.509253	1	0	0.460938
BPTF	Nucleosome-remodeling factor subunit BPTF	340791	6	2	0.141329	3	2	0.664401
BRCC3	Lys-63-specific deubiquitinase BRCC36	36471	5	6	0.876534	3	1	0.352715
BRD4	Bromodomain-containing protein 4	152580	8	7	0.685977	5	4	0.727577
BRI3BP	BRI3-binding protein	27949	2	12	0.0106159	0	3	0.115969
BRIP1	Fanconi anemia group J protein	142873	6	0	0.010343	0	0	0.991956
BRWD1	Bromodomain and WD repeat-containing protein 1	265672	7	0	0.00493923	3	0	0.10741
BSG	Basigin	42599	6	6	0.889413	2	0	0.221265
BSND	Barttin	35539	0	2	0.253175	0	0	0.991956
BTAF1	TATA-binding protein-associated factor 172	209037	4	2	0.388333	3	1	0.352715
BTBD2	BTB/POZ domain-containing protein 2	56615	0	2	0.253175	0	0	0.991956
BTF3	Transcription factor BTF3	22225	8	42	2.4607e-06	2	4	0.462494
BTF3L4	Transcription factor BTF3 homolog 4	17270	3	8	0.182101	0	0	0.991956
BUB3	Mitotic checkpoint protein BUB3	37611	10	12	0.816141	5	0	0.025684
BYSL	Bystin	49829	6	1	0.0522825	3	0	0.10741
BZW2	Basic leucine zipper and W2 domain-containing protein 2	48360	5	3	0.432598	8	12	0.406826
C11orf54	Ester hydrolase C11orf54	35630	5	8	0.508441	0	1	0.478059
C11orf68	UPF0696 protein C11orf68	27526	2	0	0.203895	0	0	0.991956
C11orf70	Uncharacterized protein C11orf70	31316	0	2	0.253175	0	0	0.991956
C11orf73	Protein Hikeshi	21685	5	18	0.0109889	2	3	0.700557
C12orf10	UPF0160 protein MYG1, mitochondrial	42791	2	4	0.509253	0	1	0.478059
C14orf166	UPF0568 protein C14orf166	28182	3	12	0.0301631	4	1	0.201586
C15orf38	UPF0552 protein C15orf38	25057	6	0	0.010343	3	0	0.10741
C16orf13	UPF0585 protein C16orf13	22863	4	2	0.388333	1	0	0.460938
C16orf80	UPF0468 protein C16orf80	22945	5	14	0.0600996	0	0	0.991956
C19orf10	UPF0556 protein C19orf10	18909	0	4	0.0660111	0	0	0.991956
C19orf43	Uncharacterized protein C19orf43	18476	2	10	0.0302381	0	0	0.991956
C1orf123	UPF0587 protein C1orf123	18391	0	4	0.0660111	0	0	0.991956
C1QBP	Complement component 1 Q subcomponent-binding protein, mitochondrial	31761	18	58	1.4058e-05	15	5	0.023056
C22orf28	tRNA-splicing ligase RtcB homolog	55723	19	20	0.931666	14	9	0.283006
C2CD3	C2 domain-containing protein 3	262621	2	0	0.203895	0	0	0.991956
C2orf47	Uncharacterized protein C2orf47, mitochondrial	32944	7	10	0.585331	0	0	0.991956
C2orf54	Uncharacterized protein C2orf54	49907	5	0	0.0216916	3	0	0.10741
C5orf42	Uncharacterized protein C5orf42	365280	2	0	0.203895	0	0	0.991956
C7orf50	Uncharacterized protein C7orf50	22140	9	20	0.0682322	10	1	0.00529524
C8orf33	UPF0488 protein C8orf33	25335	0	2	0.253175	0	0	0.991956
C8orf82	UPF0598 protein C8orf82	24288	5	0	0.0216916	0	0	0.991956
C9orf142	Uncharacterized protein C9orf142	21982	2	8	0.0826682	0	0	0.991956
C9orf64	UPF0553 protein C9orf64	39484	0	2	0.253175	0	0	0.991956
C9orf84	Uncharacterized protein C9orf84	167311	0	4	0.0660111	0	0	0.991956
CA2	Carbonic anhydrase 2	29303	3	0	0.0961434	0	0	0.991956
CAB39	Calcium-binding protein 39	40040	4	6	0.633198	2	1	0.601165
CACNA1B	Voltage-dependent N-type calcium channel subunit alpha-1B	264718	0	4	0.0660111	0	0	0.991956
CACNA1I	Voltage-dependent T-type calcium channel subunit alpha-1I	248467	0	4	0.0660111	0	0	0.991956
CACNA1S	Voltage-dependent L-type calcium channel subunit alpha-1S	214687	16	0	6.56837e-06	4	3	0.702092
CACYBP	Calcyclin-binding protein	26324	29	32	0.938207	12	7	0.242464
CAD	CAD protein	245167	46	43	0.495164	36	31	0.490371
CALB2	Calretinin	31654	4	32	3.03008e-06	2	7	0.112665
CALHM2	Calcium homeostasis modulator protein 2	36631	3	0	0.0961434	1	0	0.460938
CALM1	Calmodulin	16837	18	66	5.18583e-07	2	8	0.0676864
CALML5	Calmodulin-like protein 5	15892	0	4	0.0660111	0	0	0.991956
CALR	Calreticulin	48312	44	57	0.36804	34	16	0.00881455
CAMSAP3	Calmodulin-regulated spectrin-associated protein 3	135547	2	0	0.203895	0	0	0.991956
CAND1	Cullin-associated NEDD8-dissociated protein 1	137999	19	25	0.523761	14	19	0.423492
CANT1	Soluble calcium-activated nucleotidase 1	44926	0	2	0.253175	0	0	0.991956
CANX	Calnexin	67982	97	34	1.61978e-09	124	43	7.5222e-11
CAP1	Adenylyl cyclase-associated protein 1	52357	52	68	0.301478	42	50	0.463611
CAPG	Macrophage-capping protein	38783	2	0	0.203895	5	0	0.025684
CAPN1	Calpain-1 catalytic subunit	82465	48	61	0.402531	25	31	0.471884
CAPN11	Calpain-11	85278	0	4	0.0660111	0	0	0.991956
CAPN2	Calpain-2 catalytic subunit	80800	24	21	0.481431	12	18	0.305319
CAPNS1	Calpain small subunit 1	28487	13	42	0.000223809	10	6	0.309585
CAPRIN1	Caprin-1	78489	20	17	0.468708	21	28	0.357357
CAPS	Calcyphosin	21081	24	66	3.67027e-05	7	8	0.833848
CAPZA1	F-actin-capping protein subunit alpha-1	33094	9	24	0.0165403	7	3	0.210178
CAPZA2	F-actin-capping protein subunit alpha-2	33177	5	18	0.0109889	2	3	0.700557
CAPZB	F-actin-capping protein subunit beta	31635	17	42	0.00284865	7	7	0.968853
CARD14	Caspase recruitment domain-containing protein 14	114923	0	4	0.0660111	0	0	0.991956
CARHSP1	Calcium-regulated heat stable protein 1	16120	5	16	0.0262432	0	1	0.478059
CARKD	ATP-dependent (S)-NAD(P)H-hydrate dehydratase	36918	5	6	0.876534	2	0	0.221265
CARS	Cysteine--tRNA ligase, cytoplasmic	86103	42	32	0.136212	28	31	0.75709
CASP16	Putative caspase-16	20460	1	2	0.670103	0	1	0.478059
CASP8	Caspase-8	56132	2	1	0.562287	2	0	0.221265
CAST	Calpastatin	76925	8	14	0.282537	6	13	0.124201
CAT	Catalase	59984	20	30	0.25827	27	43	0.0683844
CATSPER1	Cation channel sperm-associated protein 1	90261	2	0	0.203895	0	0	0.991956
CBFB	Core-binding factor subunit beta	21736	7	12	0.340803	4	0	0.0524359
CBR1	Carbonyl reductase [NADPH] 1	30660	17	58	6.65333e-06	13	20	0.2517
CBR3	Carbonyl reductase [NADPH] 3	31249	12	48	7.72005e-06	2	26	1.90503e-06
CBS	Cystathionine beta-synthase	61213	1	2	0.670103	13	5	0.0564406
CBX1	Chromobox protein homolog 1	21532	3	0	0.0961434	0	0	0.991956
CBX3	Chromobox protein homolog 3	20982	20	21	0.92385	2	2	0.982014
CBX5	Chromobox protein homolog 5	22396	0	6	0.0174636	0	0	0.991956
CC2D1A	Coiled-coil and C2 domain-containing protein 1A	104397	8	4	0.208926	3	1	0.352715
CCAR1	Cell division cycle and apoptosis regulator protein 1	133423	10	2	0.0148859	9	16	0.183436
CCDC124	Coiled-coil domain-containing protein 124	25835	0	16	2.39452e-05	0	4	0.0577624
CCDC144C	Coiled-coil domain-containing protein 144C	144194	2	0	0.203895	0	0	0.991956
CCDC146	Coiled-coil domain-containing protein 146	113205	4	0	0.0455913	0	0	0.991956
CCDC158	Coiled-coil domain-containing protein 158	127652	0	3	0.128913	0	0	0.991956
CCDC176	Coiled-coil domain-containing protein 176	62157	2	0	0.203895	0	0	0.991956
CCDC180	Coiled-coil domain-containing protein 180	192404	0	4	0.0660111	0	0	0.991956
CCDC22	Coiled-coil domain-containing protein 22	71097	5	5	0.898225	2	0	0.221265
CCDC43	Coiled-coil domain-containing protein 43	25305	0	6	0.0174636	0	2	0.234147
CCDC47	Coiled-coil domain-containing protein 47	56158	4	2	0.388333	2	1	0.601165
CCDC6	Coiled-coil domain-containing protein 6	53429	2	3	0.752754	5	0	0.025684
CCDC61	Coiled-coil domain-containing protein 61	53434	2	0	0.203895	0	0	0.991956
CCDC63	Coiled-coil domain-containing protein 63	66364	2	0	0.203895	0	0	0.991956
CCDC88A	Girdin	216593	2	0	0.203895	0	0	0.991956
CCDC88C	Protein Daple	229231	2	3	0.752754	3	2	0.664401
CCNC	Cyclin-C	33642	0	4	0.0660111	0	0	0.991956
CCS	Copper chaperone for superoxide dismutase	29554	2	4	0.509253	3	0	0.10741
CCT2	T-complex protein 1 subunit beta	57794	74	68	0.335558	59	78	0.133168
CCT3	T-complex protein 1 subunit gamma	61066	26	29	0.910414	73	46	0.00972847
CCT4	T-complex protein 1 subunit delta	58401	46	63	0.222206	53	41	0.1832
CCT5	T-complex protein 1 subunit epsilon	60127	27	24	0.487552	26	24	0.724775
CCT6A	T-complex protein 1 subunit zeta	58480	42	49	0.718455	42	33	0.262125
CCT7	T-complex protein 1 subunit eta	59842	49	44	0.373624	81	44	0.000596856
CCT8	T-complex protein 1 subunit theta	60153	77	66	0.167656	78	45	0.00198107
CD109	CD109 antigen	162500	9	18	0.130022	8	11	0.530599
CD276	CD276 antigen	57941	2	0	0.203895	0	0	0.991956
CD44	CD44 antigen	82001	48	34	0.0586147	46	51	0.685179
CD59	CD59 glycoprotein	14805	6	20	0.0102794	0	0	0.991956
CD81	CD81 antigen	26494	3	4	0.806359	1	0	0.460938
CD9	CD9 antigen	25986	4	8	0.326748	0	1	0.478059
CDAN1	Codanin-1	135575	2	0	0.203895	0	0	0.991956
CDC37	Hsp90 co-chaperone Cdc37	44981	5	5	0.898225	7	5	0.553792
CDC40	Pre-mRNA-processing factor 17	66205	4	1	0.178498	0	0	0.991956
CDC42	Cell division control protein 42 homolog	21601	2	12	0.0106159	0	2	0.234147
CDC42BPB	Serine/threonine-protein kinase MRCK beta	196189	21	13	0.112839	12	9	0.491566
CDC42BPG	Serine/threonine-protein kinase MRCK gamma	173778	9	9	0.866505	4	4	0.975871
CDC42EP4	Cdc42 effector protein 4	38036	4	4	0.907895	4	4	0.975871
CDC5L	Cell division cycle 5-like protein	92422	17	17	0.819529	13	14	0.892089
CDC73	Parafibromin	60690	0	4	0.0660111	0	1	0.478059
CDCA4	Cell division cycle-associated protein 4	26570	6	0	0.010343	0	0	0.991956
CDH1	Cadherin-1	97852	23	24	0.902255	18	28	0.162895
CDH10	Cadherin-10	88850	0	4	0.0660111	0	0	0.991956
CDHR3	Cadherin-related family member 3	98375	4	8	0.326748	1	0	0.460938
CDIPT	CDP-diacylglycerol--inositol 3-phosphatidyltransferase	23881	0	2	0.253175	0	0	0.991956
CDK1	Cyclin-dependent kinase 1	34152	39	58	0.122331	34	1	6.70417e-10
CDK11A	Cyclin-dependent kinase 11A	91534	2	1	0.562287	0	1	0.478059
CDK12	Cyclin-dependent kinase 12	164738	4	3	0.643368	2	2	0.982014
CDK16	Cyclin-dependent kinase 16	55943	4	0	0.0455913	0	0	0.991956
CDK2	Cyclin-dependent kinase 2	34100	9	12	0.645461	5	0	0.025684
CDK5	Cyclin-dependent kinase 5	33760	4	10	0.154427	0	1	0.478059
CDK9	Cyclin-dependent kinase 9	43176	0	10	0.00124237	0	0	0.991956
CDV3	Protein CDV3 homolog	27335	22	54	0.000751732	30	16	0.0334763
CEACAM1	Carcinoembryonic antigen-related cell adhesion molecule 1	57981	3	2	0.614615	0	0	0.991956
CEACAM5	Carcinoembryonic antigen-related cell adhesion molecule 5	77489	5	6	0.876534	5	5	0.973325
CEACAM6	Carcinoembryonic antigen-related cell adhesion molecule 6	37457	32	27	0.344915	36	37	0.976447
CELF1	CUGBP Elav-like family member 1	52462	2	5	0.333967	2	0	0.221265
CELF2	CUGBP Elav-like family member 2	54741	3	0	0.0961434	3	0	0.10741
CELF4	CUGBP Elav-like family member 4	52308	0	2	0.253175	0	0	0.991956
CENPA	Histone H3-like centromeric protein A	16038	4	0	0.0455913	2	0	0.221265
CENPE	Centromere-associated protein E	317781	2	6	0.21368	0	0	0.991956
CENPF	Centromere protein F	370844	8	0	0.00236129	2	0	0.221265
CENPH	Centromere protein H	28538	3	2	0.614615	3	0	0.10741
CENPJ	Centromere protein J	154197	3	0	0.0961434	0	0	0.991956
CEP170	Centrosomal protein of 170 kDa	175586	1	1	0.946744	2	2	0.982014
CEP192	Centrosomal protein of 192 kDa	215312	6	6	0.889413	2	1	0.601165
CEP250	Centrosome-associated protein CEP250	282047	3	0	0.0961434	4	5	0.77592
CFL1	Cofilin-1	18719	36	58	0.0582853	17	20	0.670979
CFL2	Cofilin-2	18850	0	34	1.76733e-10	0	2	0.234147
CGN	Cingulin	136612	6	5	0.672739	0	0	0.991956
CHCHD2	Coiled-coil-helix-coiled-coil-helix domain-containing protein 2, mitochondrial	15741	3	8	0.182101	0	0	0.991956
CHCHD3	Coiled-coil-helix-coiled-coil-helix domain-containing protein 3, mitochondrial	26437	13	10	0.422593	6	1	0.0624631
CHD1	Chromodomain-helicase-DNA-binding protein 1	197826	2	0	0.203895	0	0	0.991956
CHD1L	Chromodomain-helicase-DNA-binding protein 1-like	101491	2	0	0.203895	0	0	0.991956
CHD3	Chromodomain-helicase-DNA-binding protein 3	227989	9	6	0.364872	5	4	0.727577
CHD4	Chromodomain-helicase-DNA-binding protein 4	219407	17	12	0.260228	11	9	0.629141
CHD8	Chromodomain-helicase-DNA-binding protein 8	292162	3	0	0.0961434	1	0	0.460938
CHERP	Calcium homeostasis endoplasmic reticulum protein	104150	4	4	0.907895	1	6	0.0705961
CHM	Rab proteins geranylgeranyltransferase component A 1	74740	2	0	0.203895	1	0	0.460938
CHMP1A	Charged multivesicular body protein 1a	21760	0	2	0.253175	0	0	0.991956
CHMP1B	Charged multivesicular body protein 1b	22166	3	4	0.806359	2	0	0.221265
CHMP2A	Charged multivesicular body protein 2a	25104	1	8	0.027112	1	2	0.629371
CHMP3	Charged multivesicular body protein 3	25130	3	14	0.0114261	2	3	0.700557
CHMP4A	Charged multivesicular body protein 4a	25098	1	2	0.670103	2	0	0.221265
CHMP4B	Charged multivesicular body protein 4b	24950	14	22	0.277075	16	0	1.07132e-05
CHMP5	Charged multivesicular body protein 5	24628	2	4	0.509253	1	0	0.460938
CHORDC1	Cysteine and histidine-rich domain-containing protein 1	38288	2	2	0.931281	0	0	0.991956
CHP1	Calcineurin B homologous protein 1	22456	6	4	0.463969	0	0	0.991956
CHRAC1	Chromatin accessibility complex protein 1	14767	2	0	0.203895	0	0	0.991956
CHRNE	Acetylcholine receptor subunit epsilon	55324	0	4	0.0660111	0	0	0.991956
CHST9	Carbohydrate sulfotransferase 9	52397	0	4	0.0660111	0	0	0.991956
CHTF18	Chromosome transmission fidelity protein 18 homolog	108001	4	4	0.907895	2	2	0.982014
CHTOP	Chromatin target of PRMT1 protein	26396	0	6	0.0174636	0	0	0.991956
CIAO1	Probable cytosolic iron-sulfur protein assembly protein CIAO1	38867	1	2	0.670103	0	0	0.991956
CIB1	Calcium and integrin-binding protein 1	21874	0	2	0.253175	0	0	0.991956
CINP	Cyclin-dependent kinase 2-interacting protein	24495	3	0	0.0961434	0	0	0.991956
CIRBP	Cold-inducible RNA-binding protein	18648	2	4	0.509253	0	0	0.991956
CIRH1A	Cirhin	77574	2	4	0.509253	2	3	0.700557
CISD2	CDGSH iron-sulfur domain-containing protein 2	15506	2	6	0.21368	0	0	0.991956
CIT	Citron Rho-interacting kinase	233339	13	0	5.95278e-05	7	0	0.00619857
CKAP4	Cytoskeleton-associated protein 4	66097	26	15	0.0504688	23	16	0.240691
CKAP5	Cytoskeleton-associated protein 5	227062	32	32	0.755863	22	21	0.827712
CLASP1	CLIP-associating protein 1	170373	8	7	0.685977	5	5	0.973325
CLASP2	CLIP-associating protein 2	141844	10	14	0.54225	6	12	0.178688
CLDN3	Claudin-3	23832	2	16	0.0011992	0	0	0.991956
CLIC1	Chloride intracellular channel protein 1	27248	38	116	2.80191e-09	24	13	0.0630261
CLIC4	Chloride intracellular channel protein 4	29000	5	6	0.876534	2	0	0.221265
CLINT1	Clathrin interactor 1	68273	17	8	0.0478939	8	13	0.306021
CLIP1	CAP-Gly domain-containing linker protein 1	162888	2	4	0.509253	2	3	0.700557
CLN6	Ceroid-lipofuscinosis neuronal protein 6	36033	2	0	0.203895	0	0	0.991956
CLNS1A	Methylosome subunit pICln	26386	3	6	0.403636	1	0	0.460938
CLPB	Caseinolytic peptidase B protein homolog	79193	0	2	0.253175	0	1	0.478059
CLPTM1	Cleft lip and palate transmembrane protein 1	76277	16	4	0.00408256	20	12	0.145053
CLTA	Clathrin light chain A	27190	7	14	0.184723	3	4	0.744772
CLTB	Clathrin light chain B	25304	0	10	0.00124237	0	2	0.234147
CLTC	Clathrin heavy chain 1	193260	137	173	0.172383	116	178	0.000558938
CLTCL1	Clathrin heavy chain 2	189020	40	54	0.287341	33	53	0.0393744
CLUH	Clustered mitochondria protein homolog	148003	23	16	0.176034	16	10	0.225621
CMPK1	UMP-CMP kinase	22450	8	32	0.000280467	0	1	0.478059
CNBP	Cellular nucleic acid-binding protein	20718	4	20	0.00166121	3	3	0.978719
CNDP2	Cytosolic non-specific dipeptidase	53220	6	15	0.0768379	8	3	0.13359
CNN2	Calponin-2	34096	3	0	0.0961434	0	0	0.991956
CNOT1	CCR4-NOT transcription complex subunit 1	269106	23	24	0.902255	15	14	0.812029
CNOT7	CCR4-NOT transcription complex subunit 7	33087	6	4	0.463969	3	0	0.10741
CNOT8	CCR4-NOT transcription complex subunit 8	33825	0	2	0.253175	0	0	0.991956
CNPY2	Protein canopy homolog 2	20994	13	18	0.504069	1	0	0.460938
CNTN1	Contactin-1	114175	2	0	0.203895	0	0	0.991956
CNTRL	Centriolin	270023	0	6	0.0174636	0	0	0.991956
COASY	Bifunctional coenzyme A synthase	62632	10	4	0.0856851	9	8	0.780607
COG1	Conserved oligomeric Golgi complex subunit 1	110107	3	0	0.0961434	2	0	0.221265
COG2	Conserved oligomeric Golgi complex subunit 2	83726	13	3	0.00781065	1	4	0.21916
COG5	Conserved oligomeric Golgi complex subunit 5	93198	3	0	0.0961434	0	0	0.991956
COL12A1	Collagen alpha-1(XII) chain	334138	2	0	0.203895	0	0	0.991956
COL1A1	Collagen alpha-1(I) chain	139967	4	1	0.178498	0	1	0.478059
COL24A1	Collagen alpha-1(XXIV) chain	176243	3	0	0.0961434	0	0	0.991956
COL3A1	Collagen alpha-1(III) chain	139818	0	2	0.253175	0	0	0.991956
COL4A2	Collagen alpha-2(IV) chain	168646	2	0	0.203895	0	0	0.991956
COL6A1	Collagen alpha-1(VI) chain	109602	0	2	0.253175	0	0	0.991956
COL6A5	Collagen alpha-5(VI) chain	291976	0	8	0.00464976	0	0	0.991956
COL7A1	Collagen alpha-1(VII) chain	296186	3	4	0.806359	0	0	0.991956
COLGALT1	Procollagen galactosyltransferase 1	71933	6	9	0.549495	4	8	0.279067
COMMD1	COMM domain-containing protein 1	21235	2	8	0.0826682	0	0	0.991956
COMMD10	COMM domain-containing protein 10	23023	2	0	0.203895	0	0	0.991956
COMT	Catechol O-methyltransferase	30493	9	38	4.5753e-05	2	2	0.982014
COPA	Coatomer subunit alpha	139797	68	70	0.775644	48	44	0.608609
COPB2	Coatomer subunit beta~	103278	69	78	0.786312	70	75	0.770258
COPE	Coatomer subunit epsilon	34710	13	30	0.0190568	16	0	1.07132e-05
COPG1	Coatomer subunit gamma-1	98967	10	15	0.430851	9	13	0.430719
COPG2	Coatomer subunit gamma-2	98700	0	4	0.0660111	4	2	0.430858
COPS2	COP9 signalosome complex subunit 2	51881	1	4	0.245759	0	4	0.0577624
COPS5	COP9 signalosome complex subunit 5	37807	2	0	0.203895	1	0	0.460938
COPS6	COP9 signalosome complex subunit 6	36505	2	0	0.203895	0	0	0.991956
COPS7A	COP9 signalosome complex subunit 7a	30447	2	18	0.000390268	2	7	0.112665
COPS7B	COP9 signalosome complex subunit 7b	29907	3	8	0.182101	0	2	0.234147
COPS8	COP9 signalosome complex subunit 8	23282	9	14	0.403007	3	1	0.352715
COPZ1	Coatomer subunit zeta-1	20255	0	22	4.64897e-07	0	3	0.115969
CORO1A	Coronin-1A	51710	8	6	0.505175	3	2	0.664401
CORO1B	Coronin-1B	54919	20	14	0.213349	14	4	0.0165687
CORO1C	Coronin-1C	53899	2	0	0.203895	2	0	0.221265
CORO7	Coronin-7	101626	3	9	0.118765	1	5	0.125283
COTL1	Coactosin-like protein	16059	11	48	3.06236e-06	4	0	0.0524359
COX17	Cytochrome c oxidase copper chaperone	7257	2	0	0.203895	0	0	0.991956
COX20	Cytochrome c oxidase protein 20 homolog	13519	0	2	0.253175	0	0	0.991956
COX4I1	Cytochrome c oxidase subunit 4 isoform 1, mitochondrial	19634	5	10	0.267975	0	0	0.991956
COX5B	Cytochrome c oxidase subunit 5B, mitochondrial	13924	0	2	0.253175	0	0	0.991956
COX6B1	Cytochrome c oxidase subunit 6B1	10420	1	2	0.670103	0	0	0.991956
COX6C	Cytochrome c oxidase subunit 6C	8781	0	2	0.253175	0	0	0.991956
COX7A2	Cytochrome c oxidase subunit 7A2, mitochondrial	9396	2	6	0.21368	2	1	0.601165
CPAMD8	C3 and PZP-like alpha-2-macroglobulin domain-containing protein 8	208753	0	2	0.253175	0	0	0.991956
CPD	Carboxypeptidase D	153919	19	21	0.947725	10	13	0.572854
CPNE1	Copine-1	59686	13	13	0.841178	10	9	0.788135
CPNE2	Copine-2	61874	3	0	0.0961434	0	0	0.991956
CPNE3	Copine-3	60986	12	8	0.292873	4	2	0.430858
CPOX	Coproporphyrinogen-III oxidase, mitochondrial	50950	7	4	0.315556	2	0	0.221265
CPSF1	Cleavage and polyadenylation specificity factor subunit 1	162036	9	10	0.959125	6	7	0.818348
CPSF2	Cleavage and polyadenylation specificity factor subunit 2	89286	2	2	0.931281	0	2	0.234147
CPSF3	Cleavage and polyadenylation specificity factor subunit 3	78120	3	4	0.806359	5	6	0.799542
CPSF4	Cleavage and polyadenylation specificity factor subunit 4	31281	2	0	0.203895	1	0	0.460938
CPSF6	Cleavage and polyadenylation specificity factor subunit 6	59344	18	14	0.358348	9	18	0.0962733
CPSF7	Cleavage and polyadenylation specificity factor subunit 7	52221	13	5	0.0423508	8	0	0.00305084
CPT2	Carnitine O-palmitoyltransferase 2, mitochondrial	74290	11	10	0.693495	8	9	0.846958
CRK	Adapter molecule crk	33887	9	22	0.0342568	1	0	0.460938
CRNKL1	Crooked neck-like protein 1	100902	10	7	0.383164	17	12	0.331994
CROCC	Rootletin	228920	14	18	0.634081	1	2	0.629371
CS	Citrate synthase, mitochondrial	51940	14	18	0.634081	8	6	0.578101
CSDE1	Cold shock domain-containing protein E1	89684	6	8	0.712803	6	10	0.350642
CSE1L	Exportin-2	111145	26	23	0.485768	16	16	0.953815
CSNK2A2	Casein kinase II subunit alpha~	41384	0	6	0.0174636	0	0	0.991956
CSNK2B	Casein kinase II subunit beta	25284	4	18	0.00442527	0	0	0.991956
CSPG4	Chondroitin sulfate proteoglycan 4	251218	0	8	0.00464976	0	0	0.991956
CSTB	Cystatin-B	11197	17	22	0.583611	3	1	0.352715
CSTF2T	Cleavage stimulation factor subunit 2 tau variant	64664	1	2	0.670103	0	10	0.00092063
CSTF3	Cleavage stimulation factor subunit 3	83325	3	8	0.182101	4	12	0.0525529
CTBP1	C-terminal-binding protein 1	47991	3	3	0.918731	1	1	0.986068
CTNNA1	Catenin alpha-1	100693	50	44	0.321381	45	41	0.601012
CTNNB1	Catenin beta-1	86069	31	33	0.949947	29	26	0.633775
CTNNBL1	Beta-catenin-like protein 1	65629	4	3	0.643368	2	3	0.700557
CTNND1	Catenin delta-1	108674	24	20	0.392396	25	23	0.721601
CTPS1	CTP synthase 1	67374	13	15	0.869739	10	15	0.351128
CTR9	RNA polymerase-associated protein CTR9 homolog	134332	1	2	0.670103	1	0	0.460938
CTSB	Cathepsin B	38791	0	2	0.253175	0	0	0.991956
CTSD	Cathepsin D	45065	34	84	2.21499e-05	31	8	0.000137244
CTSZ	Cathepsin Z	34552	4	16	0.0114417	6	5	0.746128
CTTN	Src substrate cortactin	61720	71	60	0.161239	75	62	0.220269
CTTNBP2	Cortactin-binding protein 2	183445	0	6	0.0174636	0	0	0.991956
CUL1	Cullin-1	90306	11	8	0.398495	7	10	0.505352
CUL2	Cullin-2	87554	4	1	0.178498	1	1	0.986068
CUL3	Cullin-3	89444	17	4	0.00236545	8	8	0.966842
CUL4A	Cullin-4A	88138	8	3	0.11017	5	3	0.484186
CUL4B	Cullin-4B	104486	6	0	0.010343	0	0	0.991956
CUL5	Cullin-5	91468	4	1	0.178498	1	1	0.986068
CUTA	Protein CutA	19230	2	10	0.0302381	0	0	0.991956
CUX1	Homeobox protein cut-like 1	164642	3	0	0.0961434	4	6	0.567753
CUX1	Protein CASP	77636	4	5	0.845642	4	6	0.567753
CUX2	Homeobox protein cut-like 2	162188	3	0	0.0961434	2	0	0.221265
CYB5A	Cytochrome b5	15330	2	8	0.0826682	0	0	0.991956
CYB5B	Cytochrome b5 type B	16446	4	14	0.0285459	0	2	0.234147
CYB5R1	NADH-cytochrome b5 reductase 1	34266	3	0	0.0961434	1	0	0.460938
CYB5R2	NADH-cytochrome b5 reductase 2	31515	8	16	0.154662	3	2	0.664401
CYB5R3	NADH-cytochrome b5 reductase 3	34463	5	26	0.000248571	4	4	0.975871
CYBA	Cytochrome b-245 light chain	21126	4	4	0.907895	0	0	0.991956
CYC1	Cytochrome c1, heme protein, mitochondrial	35764	11	24	0.049659	4	0	0.0524359
CYFIP1	Cytoplasmic FMR1-interacting protein 1	146742	7	4	0.315556	3	3	0.978719
CYP11B2	Cytochrome P450 11B2, mitochondrial	57959	0	4	0.0660111	0	0	0.991956
CYP20A1	Cytochrome P450 20A1	52774	1	4	0.245759	0	0	0.991956
CYP2A13	Cytochrome P450 2A13	56858	0	2	0.253175	0	0	0.991956
CYP51A1	Lanosterol 14-alpha demethylase	57204	8	5	0.342753	8	3	0.13359
DAB2IP	Disabled homolog 2-interacting protein	132594	4	0	0.0455913	0	0	0.991956
DACT1	Dapper homolog 1	91200	6	8	0.712803	0	0	0.991956
DAD1	Dolichyl-diphosphooligosaccharide--protein glycosyltransferase subunit DAD1	12668	4	8	0.326748	0	0	0.991956
DAK	Bifunctional ATP-dependent dihydroxyacetone kinase/FAD-AMP lyase (cyclizing)	59252	7	7	0.88127	15	13	0.670244
DARS	Aspartate--tRNA ligase, cytoplasmic	57535	61	62	0.734143	50	24	0.00180788
DARS2	Aspartate--tRNA ligase, mitochondrial	74132	7	5	0.487279	1	0	0.460938
DAZAP1	DAZ-associated protein 1	43611	2	5	0.333967	2	5	0.295743
DBI	Acyl-CoA-binding protein	10044	4	10	0.154427	0	0	0.991956
DBNL	Drebrin-like protein	48492	16	17	0.957477	19	18	0.822463
DBR1	Lariat debranching enzyme	62182	2	3	0.752754	0	5	0.0288671
DCAF5	DDB1- and CUL4-associated factor 5	105046	0	4	0.0660111	0	0	0.991956
DCAF6	DDB1- and CUL4-associated factor 6	97318	1	2	0.670103	0	0	0.991956
DCAF8	DDB1- and CUL4-associated factor 8	67536	6	10	0.414174	0	0	0.991956
DCC	Netrin receptor DCC	159367	0	2	0.253175	0	1	0.478059
DCP1B	mRNA-decapping enzyme 1B	68122	2	0	0.203895	0	0	0.991956
DCPS	m7GpppX diphosphatase	38756	4	0	0.0455913	0	0	0.991956
DCTD	Deoxycytidylate deaminase	20472	0	6	0.0174636	0	0	0.991956
DCTN1	Dynactin subunit 1	142348	3	4	0.806359	0	0	0.991956
DCTN2	Dynactin subunit 2	44345	3	7	0.274076	3	2	0.664401
DCTN3	Dynactin subunit 3	21233	2	4	0.509253	0	0	0.991956
DCTN4	Dynactin subunit 4	53249	1	3	0.410972	2	5	0.295743
DCTPP1	dCTP pyrophosphatase 1	18795	11	20	0.16596	1	1	0.986068
DCUN1D1	DCN1-like protein 1	30352	6	6	0.889413	3	0	0.10741
DCUN1D5	DCN1-like protein 5	27850	4	0	0.0455913	0	0	0.991956
DDAH1	N(G),N(G)-dimethylarginine dimethylaminohydrolase 1	31464	16	6	0.0213016	9	0	0.00150284
DDB1	DNA damage-binding protein 1	128142	16	20	0.671587	9	13	0.430719
DDI2	Protein DDI1 homolog 2	44978	1	5	0.144271	0	5	0.0288671
DDT	D-dopachrome decarboxylase	12826	7	10	0.585331	1	0	0.460938
DDX1	ATP-dependent RNA helicase DDX1	83349	34	27	0.232715	23	31	0.314412
DDX10	Probable ATP-dependent RNA helicase DDX10	101168	2	3	0.752754	1	2	0.629371
DDX17	Probable ATP-dependent RNA helicase DDX17	80906	70	68	0.532415	54	72	0.137141
DDX18	ATP-dependent RNA helicase DDX18	75702	16	12	0.341399	23	15	0.17755
DDX19A	ATP-dependent RNA helicase DDX19A	54431	14	16	0.884919	24	21	0.609462
DDX21	Nucleolar RNA helicase 2	87804	56	46	0.168417	66	47	0.0586132
DDX23	Probable ATP-dependent RNA helicase DDX23	95866	10	9	0.692023	6	6	0.971002
DDX26B	Protein DDX26B	97239	0	2	0.253175	0	0	0.991956
DDX27	Probable ATP-dependent RNA helicase DDX27	90292	13	11	0.553192	12	6	0.152159
DDX39B	Spliceosome RNA helicase DDX39B	49416	30	22	0.167174	17	12	0.331994
DDX3X	ATP-dependent RNA helicase DDX3X	73597	6	12	0.221754	10	19	0.109349
DDX3Y	ATP-dependent RNA helicase DDX3Y	73609	9	12	0.645461	0	12	0.000233213
DDX42	ATP-dependent RNA helicase DDX42	103197	16	16	0.824675	17	8	0.0665993
DDX46	Probable ATP-dependent RNA helicase DDX46	117803	31	39	0.53135	19	18	0.822463
DDX47	Probable ATP-dependent RNA helicase DDX47	50931	15	23	0.29567	9	12	0.55292
DDX5	Probable ATP-dependent RNA helicase DDX5	69661	36	39	0.993572	30	40	0.269612
DDX50	ATP-dependent RNA helicase DDX50	83084	8	8	0.873664	9	5	0.281079
DDX6	Probable ATP-dependent RNA helicase DDX6	54816	33	40	0.629134	28	14	0.0264102
DDX60L	Probable ATP-dependent RNA helicase DDX60-like	199828	2	2	0.931281	2	0	0.221265
DECR1	2,4-dienoyl-CoA reductase, mitochondrial	36353	8	22	0.0187638	4	0	0.0524359
DEK	Protein DEK	42959	16	18	0.912325	6	6	0.971002
DENND4C	DENN domain-containing protein 4C	188563	1	4	0.245759	0	1	0.478059
DENND5A	DENN domain-containing protein 5A	148634	3	0	0.0961434	1	0	0.460938
DENR	Density-regulated protein	22491	0	4	0.0660111	0	0	0.991956
DERL1	Derlin-1	28915	3	6	0.403636	0	0	0.991956
DGKA	Diacylglycerol kinase alpha	83945	0	3	0.128913	0	3	0.115969
DGKG	Diacylglycerol kinase gamma	90663	2	0	0.203895	0	0	0.991956
DHCR24	Delta(24)-sterol reductase	60842	1	1	0.946744	4	1	0.201586
DHDDS	Dehydrodolichyl diphosphate synthase	39113	0	2	0.253175	0	0	0.991956
DHFR	Dihydrofolate reductase	21510	11	20	0.16596	1	0	0.460938
DHRS1	Dehydrogenase/reductase SDR family member 1	34479	1	2	0.670103	1	0	0.460938
DHRS11	Dehydrogenase/reductase SDR family member 11	28707	3	0	0.0961434	2	0	0.221265
DHRS4	Dehydrogenase/reductase SDR family member 4	29822	5	2	0.237346	2	0	0.221265
DHRS7B	Dehydrogenase/reductase SDR family member 7B	35404	2	10	0.0302381	0	2	0.234147
DHRS9	Dehydrogenase/reductase SDR family member 9	35512	17	46	0.000699693	11	11	0.961436
DHTKD1	Probable 2-oxoglutarate dehydrogenase E1 component DHKTD1, mitochondrial	103752	9	13	0.514525	8	6	0.578101
DHX15	Putative pre-mRNA-splicing factor ATP-dependent RNA helicase DHX15	91673	28	31	0.929265	26	34	0.343561
DHX16	Putative pre-mRNA-splicing factor ATP-dependent RNA helicase DHX16	119874	4	0	0.0455913	3	0	0.10741
DHX29	ATP-dependent RNA helicase DHX29	156222	3	0	0.0961434	1	0	0.460938
DHX30	Putative ATP-dependent RNA helicase DHX30	134938	3	1	0.32108	0	0	0.991956
DHX36	Probable ATP-dependent RNA helicase DHX36	115600	7	7	0.88127	5	7	0.603392
DHX38	Pre-mRNA-splicing factor ATP-dependent RNA helicase PRP16	141270	4	2	0.388333	2	2	0.982014
DHX58	Probable ATP-dependent RNA helicase DHX58	77525	0	4	0.0660111	0	0	0.991956
DHX9	ATP-dependent RNA helicase A	142181	70	88	0.345455	59	105	0.000508297
DIABLO	Diablo homolog, mitochondrial	27359	10	18	0.197361	1	1	0.986068
DIAPH1	Protein diaphanous homolog 1	141942	23	21	0.577606	17	16	0.817862
DIDO1	Death-inducer obliterator 1	245434	1	3	0.410972	1	2	0.629371
DIO1	Type I iodothyronine deiodinase	29152	0	8	0.00464976	0	0	0.991956
DIS3	Exosome complex exonuclease RRP44	110017	9	5	0.234966	5	5	0.973325
DIS3L2	DIS3-like exonuclease 2	100243	0	4	0.0660111	0	0	0.991956
DLAT	Dihydrolipoyllysine-residue acetyltransferase component of pyruvate dehydrogenase complex, mitochondrial	69509	9	17	0.176201	1	9	0.0118961
DLD	Dihydrolipoyl dehydrogenase, mitochondrial	54747	26	33	0.54421	31	13	0.00530333
DLST	Dihydrolipoyllysine-residue succinyltransferase component of 2-oxoglutarate dehydrogenase complex, mitochondrial	49097	27	31	0.822046	34	29	0.480226
DMBT1	Deleted in malignant brain tumors 1 protein	268039	2	0	0.203895	3	0	0.10741
DNAH1	Dynein heavy chain 1, axonemal	497998	0	4	0.0660111	2	0	0.221265
DNAH10	Dynein heavy chain 10, axonemal	517705	8	0	0.00236129	1	0	0.460938
DNAH2	Dynein heavy chain 2, axonemal	511115	2	6	0.21368	0	0	0.991956
DNAH3	Dynein heavy chain 3, axonemal	474075	4	4	0.907895	1	0	0.460938
DNAH5	Dynein heavy chain 5, axonemal	532504	3	3	0.918731	0	1	0.478059
DNAH6	Dynein heavy chain 6, axonemal	479971	4	0	0.0455913	0	0	0.991956
DNAH8	Dynein heavy chain 8, axonemal	518309	2	0	0.203895	0	0	0.991956
DNAJA1	DnaJ homolog subfamily A member 1	45609	7	3	0.178108	4	0	0.0524359
DNAJA2	DnaJ homolog subfamily A member 2	46373	2	3	0.752754	2	0	0.221265
DNAJB1	DnaJ homolog subfamily B member 1	38215	5	0	0.0216916	6	0	0.012608
DNAJC10	DnaJ homolog subfamily C member 10	92333	5	4	0.66111	2	16	0.000790719
DNAJC12	DnaJ homolog subfamily C member 12	23586	1	2	0.670103	1	0	0.460938
DNAJC13	DnaJ homolog subfamily C member 13	256533	15	10	0.238082	13	9	0.37647
DNAJC2	DnaJ homolog subfamily C member 2	72465	6	5	0.672739	3	3	0.978719
DNAJC21	DnaJ homolog subfamily C member 21	62484	1	2	0.670103	0	1	0.478059
DNAJC3	DnaJ homolog subfamily C member 3	58036	9	6	0.364872	11	4	0.068804
DNAJC7	DnaJ homolog subfamily C member 7	57239	2	3	0.752754	0	0	0.991956
DNAJC9	DnaJ homolog subfamily C member 9	30081	9	10	0.959125	6	2	0.16552
DNM1L	Dynamin-1-like protein	82339	4	9	0.226789	5	6	0.799542
DNM2	Dynamin-2	98345	21	10	0.0292032	13	7	0.172449
DNMT1	DNA (cytosine-5)-methyltransferase 1	185388	12	12	0.847098	7	7	0.968853
DNPEP	Aspartyl aminopeptidase	53055	6	4	0.463969	5	4	0.727577
DOCK1	Dedicator of cytokinesis protein 1	216313	2	0	0.203895	1	0	0.460938
DOCK11	Dedicator of cytokinesis protein 11	240292	2	0	0.203895	0	0	0.991956
DOCK5	Dedicator of cytokinesis protein 5	216333	2	0	0.203895	0	0	0.991956
DOCK6	Dedicator of cytokinesis protein 6	231296	3	4	0.806359	0	2	0.234147
DOCK7	Dedicator of cytokinesis protein 7	244289	8	3	0.11017	3	3	0.978719
DOCK8	Dedicator of cytokinesis protein 8	240886	2	2	0.931281	1	3	0.376223
DOCK9	Dedicator of cytokinesis protein 9	238519	7	2	0.0824056	2	0	0.221265
DOHH	Deoxyhypusine hydroxylase	33303	0	2	0.253175	0	0	0.991956
DOK7	Protein Dok-7	53838	9	13	0.514525	4	0	0.0524359
DPM1	Dolichol-phosphate mannosyltransferase	29691	5	0	0.0216916	3	0	0.10741
DPP3	Dipeptidyl peptidase 3	82880	42	28	0.0464756	66	40	0.00853998
DPP7	Dipeptidyl peptidase 2	54797	3	8	0.182101	2	1	0.601165
DPP8	Dipeptidyl peptidase 8	104034	0	3	0.128913	0	0	0.991956
DPP9	Dipeptidyl peptidase 9	98999	6	9	0.549495	2	8	0.0676864
DPY19L2	Probable C-mannosyltransferase DPY19L2	88229	0	4	0.0660111	0	0	0.991956
DPY30	Protein dpy-30 homolog	11250	0	14	8.92056e-05	0	2	0.234147
DPYSL2	Dihydropyrimidinase-related protein 2	62749	0	2	0.253175	1	0	0.460938
DPYSL3	Dihydropyrimidinase-related protein 3	62323	3	10	0.076226	3	4	0.744772
DR1	Protein Dr1	19672	0	2	0.253175	0	0	0.991956
DRAP1	Dr1-associated corepressor	22464	0	2	0.253175	0	0	0.991956
DSG1	Desmoglein-1	114702	2	3	0.752754	1	6	0.0705961
DSG2	Desmoglein-2	123016	8	8	0.873664	5	3	0.484186
DSP	Desmoplakin	334021	64	70	0.945355	42	50	0.463611
DST	Dystonin	865259	12	7	0.195085	6	3	0.323307
DSTN	Destrin	18962	7	14	0.184723	0	0	0.991956
DTD1	D-tyrosyl-tRNA(Tyr) deacylase 1	23594	3	2	0.614615	3	0	0.10741
DTYMK	Thymidylate kinase	23990	14	38	0.00205343	0	0	0.991956
DUS3L	tRNA-dihydrouridine(47) synthase [NAD(P)(+)]-like	73688	7	4	0.315556	9	7	0.598084
DUSP3	Dual specificity protein phosphatase 3	20706	3	12	0.0301631	0	0	0.991956
DUT	Deoxyuridine 5~-triphosphate nucleotidohydrolase, mitochondrial	26848	10	52	1.63754e-07	6	9	0.47645
DYNC1H1	Cytoplasmic dynein 1 heavy chain 1	534809	180	216	0.298159	138	175	0.0558722
DYNC1I1	Cytoplasmic dynein 1 intermediate chain 1	73468	3	0	0.0961434	1	0	0.460938
DYNC1I2	Cytoplasmic dynein 1 intermediate chain 2	71811	18	21	0.817444	27	35	0.352702
DYNC1LI2	Cytoplasmic dynein 1 light intermediate chain 2	54384	6	3	0.281404	3	2	0.664401
DYNC2H1	Cytoplasmic dynein 2 heavy chain 1	496096	3	4	0.806359	0	0	0.991956
DYNLRB1	Dynein light chain roadblock-type 1	10921	0	6	0.0174636	0	0	0.991956
ECH1	Delta(3,5)-Delta(2,4)-dienoyl-CoA isomerase, mitochondrial	36158	12	36	0.00119466	5	5	0.973325
ECHDC3	Enoyl-CoA hydratase domain-containing protein 3, mitochondrial	32976	3	10	0.076226	3	1	0.352715
ECHS1	Enoyl-CoA hydratase, mitochondrial	31843	15	36	0.00735066	17	0	5.29247e-06
ECI1	Enoyl-CoA delta isomerase 1, mitochondrial	33101	11	44	1.88378e-05	10	7	0.452388
ECM29	Proteasome-associated protein ECM29 homolog	205985	39	44	0.847407	38	29	0.239579
ECT2	Protein ECT2	104531	0	4	0.0660111	0	0	0.991956
EDC4	Enhancer of mRNA-decapping protein 4	152992	6	5	0.672739	6	3	0.323307
EDEM1	ER degradation-enhancing alpha-mannosidase-like protein 1	74224	0	4	0.0660111	17	0	5.29247e-06
EDF1	Endothelial differentiation-related factor 1	16368	2	10	0.0302381	0	0	0.991956
EEA1	Early endosome antigen 1	163337	21	23	0.968434	19	18	0.822463
EED	Polycomb protein EED	50939	4	0	0.0455913	2	0	0.221265
EEF1A1	Elongation factor 1-alpha 1	50483	60	144	6.26677e-08	36	86	8.03328e-06
EEF1A1P5	Putative elongation factor 1-alpha-like 3	50495	63	0	7.13417e-21	50	0	4.29847e-16
EEF1A2	Elongation factor 1-alpha 2	50780	0	43	4.82774e-13	0	0	0.991956
EEF1B2	Elongation factor 1-beta	24935	26	39	0.195887	32	13	0.00359951
EEF1D	Elongation factor 1-delta	31236	57	118	3.46616e-05	23	11	0.0350145
EEF1E1	Eukaryotic translation elongation factor 1 epsilon-1	19867	7	6	0.680602	0	0	0.991956
EEF1G	Elongation factor 1-gamma	50429	70	84	0.518528	52	44	0.361777
EEF2	Elongation factor 2	96246	142	188	0.0669044	142	222	6.00404e-05
EEFSEC	Selenocysteine-specific elongation factor	65932	3	3	0.918731	5	3	0.484186
EFCAB5	EF-hand calcium-binding domain-containing protein 5	174371	2	0	0.203895	0	0	0.991956
EFCC1	EF-hand and coiled-coil domain-containing protein 1	66385	2	0	0.203895	0	0	0.991956
EFHC1	EF-hand domain-containing protein 1	74446	2	0	0.203895	0	0	0.991956
EFHD2	EF-hand domain-containing protein D2	26794	33	37	0.880739	19	7	0.0163096
EFTUD1	Elongation factor Tu GTP-binding domain-containing protein 1	126661	9	10	0.959125	5	11	0.152737
EFTUD2	116 kDa U5 small nuclear ribonucleoprotein component	110336	17	36	0.0196231	15	26	0.100519
EGF	Pro-epidermal growth factor	137701	2	0	0.203895	0	0	0.991956
EGFL6	Epidermal growth factor-like protein 6	63484	0	4	0.0660111	0	0	0.991956
EGFR	Epidermal growth factor receptor	137612	24	14	0.0643192	16	8	0.0960798
EHBP1	EH domain-binding protein 1	140643	0	3	0.128913	0	0	0.991956
EHBP1L1	EH domain-binding protein 1-like protein 1	162554	8	6	0.505175	7	2	0.0992174
EHD1	EH domain-containing protein 1	60683	1	5	0.144271	16	1	0.000111486
EHHADH	Peroxisomal bifunctional enzyme	80072	10	14	0.54225	7	12	0.28052
EHMT1	Histone-lysine N-methyltransferase EHMT1	144089	2	0	0.203895	0	0	0.991956
EIF1AX	Eukaryotic translation initiation factor 1A, X-chromosomal	16574	3	4	0.806359	0	0	0.991956
EIF2A	Eukaryotic translation initiation factor 2A	65560	18	15	0.459533	13	4	0.026973
EIF2B1	Translation initiation factor eIF-2B subunit alpha	33997	0	9	0.00240268	0	1	0.478059
EIF2B3	Translation initiation factor eIF-2B subunit gamma	50981	2	0	0.203895	0	0	0.991956
EIF2D	Eukaryotic translation initiation factor 2D	65333	2	1	0.562287	0	0	0.991956
EIF2S1	Eukaryotic translation initiation factor 2 subunit 1	36397	37	68	0.00830612	36	23	0.0779391
EIF2S2	Eukaryotic translation initiation factor 2 subunit 2	38730	13	12	0.694481	5	8	0.442883
EIF2S3	Eukaryotic translation initiation factor 2 subunit 3	51679	30	32	0.956902	34	14	0.00298797
EIF3A	Eukaryotic translation initiation factor 3 subunit A	166867	60	61	0.737316	39	39	0.928597
EIF3B	Eukaryotic translation initiation factor 3 subunit B	92823	49	71	0.113468	35	41	0.551381
EIF3C	Eukaryotic translation initiation factor 3 subunit C	105962	43	0	1.65243e-14	42	0	1.1971e-13
EIF3CL	Eukaryotic translation initiation factor 3 subunit C-like protein	106156	14	41	0.000667905	6	36	2.11888e-06
EIF3D	Eukaryotic translation initiation factor 3 subunit D	64600	0	4	0.0660111	29	14	0.0187516
EIF3E	Eukaryotic translation initiation factor 3 subunit E	52620	16	8	0.0709945	13	5	0.0564406
EIF3F	Eukaryotic translation initiation factor 3 subunit F	37678	14	15	0.977189	16	4	0.00605476
EIF3I	Eukaryotic translation initiation factor 3 subunit I	36901	2	10	0.0302381	2	4	0.462494
EIF3J	Eukaryotic translation initiation factor 3 subunit J	29176	6	8	0.712803	1	5	0.125283
EIF3K	Eukaryotic translation initiation factor 3 subunit K	25345	4	18	0.00442527	0	4	0.0577624
EIF3L	Eukaryotic translation initiation factor 3 subunit L	66954	2	3	0.752754	45	12	5.6007e-06
EIF3M	Eukaryotic translation initiation factor 3 subunit M	42959	8	14	0.282537	2	5	0.295743
EIF4A1	Eukaryotic initiation factor 4A-I	46382	31	37	0.687153	23	26	0.723994
EIF4A2	Eukaryotic initiation factor 4A-II	46630	24	24	0.787197	24	11	0.0243716
EIF4A3	Eukaryotic initiation factor 4A-III	47156	11	9	0.539604	6	7	0.818348
EIF4B	Eukaryotic translation initiation factor 4B	69167	18	10	0.0887988	11	7	0.334596
EIF4E	Eukaryotic translation initiation factor 4E	25325	7	8	0.923596	5	0	0.025684
EIF4E2	Eukaryotic translation initiation factor 4E type 2	28476	0	6	0.0174636	0	5	0.0288671
EIF4G1	Eukaryotic translation initiation factor 4 gamma 1	176124	98	80	0.0625734	73	76	0.903307
EIF4G2	Eukaryotic translation initiation factor 4 gamma 2	102810	13	10	0.422593	9	9	0.964947
EIF4H	Eukaryotic translation initiation factor 4H	27442	11	16	0.456845	7	2	0.0992174
EIF5	Eukaryotic translation initiation factor 5	49679	29	29	0.767062	20	11	0.0972269
EIF5A	Eukaryotic translation initiation factor 5A-1	17060	22	52	0.00145101	0	3	0.115969
EIF5B	Eukaryotic translation initiation factor 5B	139198	41	33	0.208241	27	26	0.833533
EIF6	Eukaryotic translation initiation factor 6	27112	14	46	9.27417e-05	5	1	0.113032
ELAC2	Zinc phosphodiesterase ELAC protein 2	93415	6	8	0.712803	7	3	0.210178
ELAVL1	ELAV-like protein 1	36240	10	15	0.430851	5	5	0.973325
ELAVL2	ELAV-like protein 2	39789	2	0	0.203895	0	1	0.478059
ELFN2	Protein phosphatase 1 regulatory subunit 29	90770	2	0	0.203895	0	0	0.991956
ELL2	RNA polymerase II elongation factor ELL2	72780	2	0	0.203895	1	0	0.460938
ELL3	RNA polymerase II elongation factor ELL3	45817	0	2	0.253175	0	0	0.991956
ELOVL1	Elongation of very long chain fatty acids protein 1	32776	2	2	0.931281	1	0	0.460938
ELP2	Elongator complex protein 2	94266	1	4	0.245759	1	0	0.460938
ELP3	Elongator complex protein 3	62829	3	0	0.0961434	1	0	0.460938
EMC1	ER membrane protein complex subunit 1	112145	11	11	0.853269	7	6	0.760302
EMC2	ER membrane protein complex subunit 2	35004	11	10	0.693495	8	0	0.00305084
EMC3	ER membrane protein complex subunit 3	29952	1	14	0.000798133	0	3	0.115969
EMC8	ER membrane protein complex subunit 8	24229	3	6	0.403636	0	2	0.234147
EMG1	Ribosomal RNA small subunit methyltransferase NEP1	26948	3	10	0.076226	2	0	0.221265
EML2	Echinoderm microtubule-associated protein-like 2	71648	3	2	0.614615	5	0	0.025684
EML3	Echinoderm microtubule-associated protein-like 3	96221	0	3	0.128913	1	3	0.376223
EML4	Echinoderm microtubule-associated protein-like 4	109932	36	29	0.239769	31	19	0.0784208
ENDOD1	Endonuclease domain-containing 1 protein	55758	4	0	0.0455913	2	0	0.221265
ENO1	Alpha-enolase	47481	100	169	0.000326928	89	104	0.348692
ENO3	Beta-enolase	47329	0	4	0.0660111	7	10	0.505352
ENOPH1	Enolase-phosphatase E1	29103	8	6	0.505175	5	2	0.270486
EP400	E1A-binding protein p400	344702	5	0	0.0216916	3	0	0.10741
EPB41L1	Band 4.1-like protein 1	99012	5	4	0.66111	1	4	0.21916
EPB41L2	Band 4.1-like protein 2	113032	4	0	0.0455913	4	0	0.0524359
EPCAM	Epithelial cell adhesion molecule	35617	8	18	0.0801347	11	6	0.219143
EPHA10	Ephrin type-A receptor 10	111654	3	0	0.0961434	5	0	0.025684
EPHA2	Ephrin type-A receptor 2	109679	22	18	0.383205	23	21	0.714503
EPHA6	Ephrin type-A receptor 6	117769	0	2	0.253175	2	0	0.221265
EPHX1	Epoxide hydrolase 1	53176	6	1	0.0522825	0	0	0.991956
EPN1	Epsin-1	60370	6	4	0.463969	9	10	0.85827
EPN3	Epsin-3	68351	2	0	0.203895	0	0	0.991956
EPPK1	Epiplakin	557674	45	38	0.263761	32	29	0.645195
EPRS	Bifunctional glutamate/proline--tRNA ligase	172080	63	69	0.939621	48	55	0.559291
EPS15	Epidermal growth factor receptor substrate 15	99222	2	4	0.509253	2	4	0.462494
EPS15L1	Epidermal growth factor receptor substrate 15-like 1	94311	5	4	0.66111	2	6	0.184407
EPS8	Epidermal growth factor receptor kinase substrate 8	92167	21	12	0.0756577	28	15	0.0412566
EPS8L1	Epidermal growth factor receptor kinase substrate 8-like protein 1	80487	3	5	0.579351	2	5	0.295743
EPS8L2	Epidermal growth factor receptor kinase substrate 8-like protein 2	81197	22	21	0.684318	13	22	0.147663
ERAP1	Endoplasmic reticulum aminopeptidase 1	107736	2	0	0.203895	2	0	0.221265
ERBB2	Receptor tyrosine-protein kinase erbB-2	141185	3	5	0.579351	2	2	0.982014
ERBB4	Receptor tyrosine-protein kinase erbB-4	150116	0	4	0.0660111	0	0	0.991956
ERC1	ELKS/Rab6-interacting/CAST family member 1	128236	3	1	0.32108	0	1	0.478059
ERCC6L	DNA excision repair protein ERCC-6-like	142071	5	0	0.0216916	2	0	0.221265
ERGIC1	Endoplasmic reticulum-Golgi intermediate compartment protein 1	32991	7	8	0.923596	5	0	0.025684
ERH	Enhancer of rudimentary homolog	12430	4	8	0.326748	0	0	0.991956
ERLIN1	Erlin-1	39072	5	14	0.0600996	6	10	0.350642
ERMP1	Endoplasmic reticulum metallopeptidase 1	101023	20	23	0.843992	10	21	0.0563756
ERO1L	ERO1-like protein alpha	55213	22	23	0.909173	25	34	0.277411
ERP29	Endoplasmic reticulum resident protein 29	29050	17	36	0.0196231	13	2	0.00348309
ERP44	Endoplasmic reticulum resident protein 44	47341	9	9	0.866505	7	5	0.553792
ESCO2	N-acetyltransferase ESCO2	69276	12	0	0.000124174	3	2	0.664401
ESD	S-formylglutathione hydrolase	31976	15	30	0.048481	7	1	0.0341247
ESRP1	Epithelial splicing regulatory protein 1	76449	5	6	0.876534	2	6	0.184407
ESYT1	Extended synaptotagmin-1	123293	11	12	0.987809	7	7	0.968853
ESYT2	Extended synaptotagmin-2	102807	1	4	0.245759	1	2	0.629371
ETF1	Eukaryotic peptide chain release factor subunit 1	49259	19	27	0.364846	17	14	0.556724
ETFA	Electron transfer flavoprotein subunit alpha, mitochondrial	35421	44	76	0.0122395	34	9	7.8355e-05
ETFB	Electron transfer flavoprotein subunit beta	28071	30	70	0.000258592	19	0	1.29222e-06
ETHE1	Protein ETHE1, mitochondrial	28386	9	10	0.959125	4	0	0.0524359
EVPL	Envoplakin	232774	41	35	0.306579	34	28	0.40289
EWSR1	RNA-binding protein EWS	68721	16	15	0.69288	12	21	0.135094
EXOC3L4	Exocyst complex component 3-like protein 4	80465	2	2	0.931281	1	0	0.460938
EXOC4	Exocyst complex component 4	111170	1	4	0.245759	1	3	0.376223
EXOC7	Exocyst complex component 7	83729	5	0	0.0216916	2	0	0.221265
EXOSC1	Exosome complex component CSL4	21794	3	12	0.0301631	3	4	0.744772
EXOSC2	Exosome complex component RRP4	33017	3	30	2.03683e-06	4	5	0.77592
EXOSC3	Exosome complex component RRP40	30028	0	4	0.0660111	0	0	0.991956
EXOSC4	Exosome complex component RRP41	26668	4	4	0.907895	2	0	0.221265
EXOSC6	Exosome complex component MTR3	28520	4	10	0.154427	2	2	0.982014
EXOSC7	Exosome complex component RRP42	32449	5	6	0.876534	2	0	0.221265
EXOSC8	Exosome complex component RRP43	30610	8	8	0.873664	5	0	0.025684
EXOSC9	Exosome complex component RRP45	49576	4	1	0.178498	2	0	0.221265
EZR	Ezrin	69484	330	177	1.31199e-14	307	207	3.34083e-06
F11	Coagulation factor XI	72162	7	4	0.315556	2	2	0.982014
F11R	Junctional adhesion molecule A	32982	9	4	0.135155	6	1	0.0624631
FABP4	Fatty acid-binding protein, adipocyte	14833	10	30	0.00317587	3	2	0.664401
FABP5	Fatty acid-binding protein, epidermal	15507	21	54	0.00043291	1	1	0.986068
FAF2	FAS-associated factor 2	52965	8	12	0.484259	0	2	0.234147
FAHD1	Acylpyruvase FAHD1, mitochondrial	25128	3	4	0.806359	0	1	0.478059
FAHD2A	Fumarylacetoacetate hydrolase domain-containing protein 2A	34938	0	4	0.0660111	0	0	0.991956
FAM103A1	RNMT-activating mini protein	14381	2	0	0.203895	0	0	0.991956
FAM107B	Protein FAM107B	15558	4	4	0.907895	0	0	0.991956
FAM120A	Constitutive coactivator of PPAR-gamma-like protein 1	123008	19	14	0.278534	11	8	0.473314
FAM129B	Niban-like protein 1	84598	57	67	0.642589	57	67	0.434066
FAM134C	Protein FAM134C	51795	5	4	0.66111	8	4	0.248282
FAM136A	Protein FAM136A	16155	0	4	0.0660111	0	0	0.991956
FAM172BP	Putative protein FAM172B	42254	1	3	0.410972	0	0	0.991956
FAM175B	BRISC complex subunit Abro1	47128	4	3	0.643368	3	0	0.10741
FAM184B	Protein FAM184B	121955	0	2	0.253175	0	0	0.991956
FAM186A	Protein FAM186A	263154	6	14	0.110988	2	0	0.221265
FAM207A	Protein FAM207A	25456	2	6	0.21368	1	0	0.460938
FAM208B	Protein FAM208B	271863	2	2	0.931281	0	0	0.991956
FAM213A	Redox-regulatory protein FAM213A	25878	11	12	0.987809	4	3	0.702092
FAM21A	WASH complex subunit FAM21A	147266	8	0	0.00236129	6	0	0.012608
FAM21C	WASH complex subunit FAM21C	144752	0	17	1.24096e-05	0	14	5.91616e-05
FAM3C	Protein FAM3C	24965	0	4	0.0660111	0	0	0.991956
FAM43B	Protein FAM43B	37289	0	3	0.128913	0	0	0.991956
FAM49B	Protein FAM49B	37033	15	17	0.89907	16	1	0.000111486
FAM83H	Protein FAM83H	127557	2	2	0.931281	1	2	0.629371
FAM86B1	Protein FAM86B1	33264	2	0	0.203895	0	0	0.991956
FAM91A1	Protein FAM91A1	94648	6	8	0.712803	11	12	0.877002
FAM96B	Mitotic spindle-associated MMXD complex subunit MIP18	17777	0	8	0.00464976	0	0	0.991956
FAM98A	Protein FAM98A	55856	2	1	0.562287	5	2	0.270486
FAM98B	Protein FAM98B	37590	0	3	0.128913	0	2	0.234147
FANCD2	Fanconi anemia group D2 protein	168295	5	2	0.237346	1	0	0.460938
FANCI	Fanconi anemia group I protein	150769	3	4	0.806359	1	2	0.629371
FAR1	Fatty acyl-CoA reductase 1	59698	6	6	0.889413	2	0	0.221265
FARS2	Phenylalanine--tRNA ligase, mitochondrial	52698	0	4	0.0660111	0	0	0.991956
FARSA	Phenylalanine--tRNA ligase alpha subunit	57585	4	9	0.226789	5	9	0.317177
FARSB	Phenylalanine--tRNA ligase beta subunit	66742	3	5	0.579351	20	5	0.00203534
FASN	Fatty acid synthase	275877	228	199	0.0278067	178	193	0.559625
FAT1	Protocadherin Fat 1	509690	2	1	0.562287	1	0	0.460938
FAT2	Protocadherin Fat 2	482097	3	2	0.614615	0	0	0.991956
FBL	rRNA 2~-O-methyltransferase fibrillarin	33898	2	10	0.0302381	1	0	0.460938
FBN1	Fibrillin-1	332888	0	2	0.253175	0	0	0.991956
FBP1	Fructose-1,6-bisphosphatase 1	37241	15	32	0.0266475	7	5	0.553792
FBP2	Fructose-1,6-bisphosphatase isozyme 2	37085	3	8	0.182101	0	2	0.234147
FDFT1	Squalene synthase	48597	6	0	0.010343	2	0	0.221265
FDPS	Farnesyl pyrophosphate synthase	48788	4	0	0.0455913	0	0	0.991956
FDXR	NADPH:adrenodoxin oxidoreductase, mitochondrial	54293	3	2	0.614615	0	0	0.991956
FEN1	Flap endonuclease 1	42935	4	4	0.907895	4	1	0.201586
FER1L5	Fer-1-like protein 5	244128	2	0	0.203895	0	0	0.991956
FERMT1	Fermitin family homolog 1	78015	10	7	0.383164	11	7	0.334596
FERMT2	Fermitin family homolog 2	78438	2	2	0.931281	1	3	0.376223
FES	Tyrosine-protein kinase Fes/Fps	94180	4	2	0.388333	1	0	0.460938
FGFR2	Fibroblast growth factor receptor 2	93051	4	0	0.0455913	0	0	0.991956
FGR	Tyrosine-protein kinase Fgr	60068	2	0	0.203895	0	0	0.991956
FH	Fumarate hydratase, mitochondrial	54808	13	20	0.326651	17	15	0.684622
FHL2	Four and a half LIM domains protein 2	34189	3	10	0.076226	2	2	0.982014
FIP1L1	Pre-mRNA 3~-end-processing factor FIP1	66640	6	6	0.889413	0	1	0.478059
FIS1	Mitochondrial fission 1 protein	16995	4	4	0.907895	0	0	0.991956
FITM2	Fat storage-inducing transmembrane protein 2	30368	0	2	0.253175	0	0	0.991956
FKBP10	Peptidyl-prolyl cis-trans isomerase FKBP10	64758	25	12	0.0179833	5	13	0.0685927
FKBP1A	Peptidyl-prolyl cis-trans isomerase FKBP1A	12008	7	10	0.585331	0	1	0.478059
FKBP2	Peptidyl-prolyl cis-trans isomerase FKBP2	15820	3	8	0.182101	0	0	0.991956
FKBP3	Peptidyl-prolyl cis-trans isomerase FKBP3	25234	9	36	0.000113451	4	3	0.702092
FKBP4	Peptidyl-prolyl cis-trans isomerase FKBP4	52089	80	71	0.227965	78	43	0.000960809
FKBP8	Peptidyl-prolyl cis-trans isomerase FKBP8	45018	0	2	0.253175	0	0	0.991956
FLII	Protein flightless-1 homolog	146142	50	44	0.321381	32	32	0.935217
FLNA	Filamin-A	283301	175	172	0.378726	167	143	0.123728
FLNB	Filamin-B	280157	371	412	0.70006	319	361	0.177995
FLOT1	Flotillin-1	47583	5	5	0.898225	3	7	0.235241
FMN1	Formin-1	158888	2	4	0.509253	0	0	0.991956
FOXE1	Forkhead box protein E1	38361	3	6	0.403636	1	1	0.986068
FOXQ1	Forkhead box protein Q1	41868	2	0	0.203895	0	0	0.991956
FOXRED1	FAD-dependent oxidoreductase domain-containing protein 1	54153	0	2	0.253175	0	0	0.991956
FREM2	FRAS1-related extracellular matrix protein 2	352807	0	2	0.253175	0	0	0.991956
FRY	Protein furry homolog	342080	5	7	0.676604	1	3	0.376223
FRYL	Protein furry homolog-like	342177	16	13	0.447674	7	6	0.760302
FSCN1	Fascin	55157	18	12	0.195245	14	0	4.39221e-05
FTH1	Ferritin heavy chain	21383	4	5	0.845642	2	13	0.00444668
FTSJ3	pre-rRNA processing protein FTSJ3	96898	4	7	0.460596	3	7	0.235241
FTSJD2	Cap-specific mRNA (nucleoside-2~-O-)-methyltransferase 1	96172	0	2	0.253175	0	1	0.478059
FUBP1	Far upstream element-binding protein 1	67690	37	34	0.495978	45	42	0.678579
FUCA1	Tissue alpha-L-fucosidase	53973	2	2	0.931281	2	1	0.601165
FUCA2	Plasma alpha-L-fucosidase	54408	1	2	0.670103	0	0	0.991956
FURIN	Furin	87932	2	0	0.203895	0	0	0.991956
FUS	RNA-binding protein FUS	53653	27	50	0.022255	30	53	0.01494
FXR1	Fragile X mental retardation syndrome-related protein 1	70020	9	8	0.689624	15	13	0.670244
FYCO1	FYVE and coiled-coil domain-containing protein 1	168590	2	1	0.562287	2	1	0.601165
FYN	Tyrosine-protein kinase Fyn	61275	3	0	0.0961434	0	0	0.991956
G3BP1	Ras GTPase-activating protein-binding protein 1	52221	10	9	0.692023	28	14	0.0264102
G3BP2	Ras GTPase-activating protein-binding protein 2	54178	0	6	0.0174636	0	0	0.991956
G6PD	Glucose-6-phosphate 1-dehydrogenase	59712	14	16	0.884919	16	11	0.316989
GABRA5	Gamma-aminobutyric acid receptor subunit alpha-5	52431	3	0	0.0961434	0	0	0.991956
GAL3ST4	Galactose-3-O-sulfotransferase 4	54451	2	0	0.203895	0	0	0.991956
GALE	UDP-glucose 4-epimerase	38681	3	8	0.182101	1	0	0.460938
GALNT2	Polypeptide N-acetylgalactosaminyltransferase 2	65474	2	2	0.931281	10	0	0.000740781
GALNT3	Polypeptide N-acetylgalactosaminyltransferase 3	73465	5	9	0.373063	0	4	0.0577624
GALNT4	Polypeptide N-acetylgalactosaminyltransferase 4	67521	1	2	0.670103	0	1	0.478059
GALNT7	N-acetylgalactosaminyltransferase 7	76025	11	17	0.362074	5	17	0.0117934
GANAB	Neutral alpha-glucosidase AB	107263	63	68	0.99384	39	39	0.928597
GAPDH	Glyceraldehyde-3-phosphate dehydrogenase	36201	213	298	0.0037905	266	267	0.849541
GAPDHS	Glyceraldehyde-3-phosphate dehydrogenase, testis-specific	44843	2	4	0.509253	0	0	0.991956
GAPVD1	GTPase-activating protein and VPS9 domain-containing protein 1	166359	19	20	0.931666	15	18	0.648328
GARS	Glycine--tRNA ligase	83854	17	20	0.803072	16	11	0.316989
GART	Trifunctional purine biosynthetic protein adenosine-3	108953	37	54	0.158875	21	30	0.238511
GATAD2A	Transcriptional repressor p66-alpha	68404	0	4	0.0660111	0	5	0.0288671
GATAD2B	Transcriptional repressor p66-beta	65602	6	0	0.010343	0	0	0.991956
GBAS	Protein NipSnap homolog 2	33970	2	4	0.509253	2	0	0.221265
GBF1	Golgi-specific brefeldin A-resistance guanine nucleotide exchange factor 1	208367	2	2	0.931281	2	1	0.601165
GBP2	Interferon-induced guanylate-binding protein 2	67722	7	6	0.680602	10	6	0.309585
GCC2	GRIP and coiled-coil domain-containing protein 2	196872	13	6	0.0796337	8	5	0.399515
GCLC	Glutamate--cysteine ligase catalytic subunit	73518	22	19	0.475855	8	32	0.000139631
GCN1L1	Translational activator GCN1	294967	113	83	0.00731683	77	57	0.0655571
GCNT4	Beta-1,3-galactosyl-O-glycosyl-glycoprotein beta-1,6-N-acetylglucosaminyltransferase 4	53622	0	2	0.253175	0	0	0.991956
GDA	Guanine deaminase	51516	4	7	0.460596	0	4	0.0577624
GDF7	Growth/differentiation factor 7	47577	0	8	0.00464976	0	0	0.991956
GDI1	Rab GDP dissociation inhibitor alpha	51210	29	34	0.751216	22	9	0.0169413
GDI2	Rab GDP dissociation inhibitor beta	51119	46	71	0.0583389	34	35	0.97194
GEMIN5	Gem-associated protein 5	170821	28	33	0.739941	22	27	0.524468
GET4	Golgi to ER traffic protein 4 homolog	36732	3	10	0.076226	7	1	0.0341247
GFM1	Elongation factor G, mitochondrial	84103	11	10	0.693495	8	8	0.966842
GFPT1	Glutamine--fructose-6-phosphate aminotransferase [isomerizing] 1	79555	59	63	0.946646	27	59	0.000728692
GGA1	ADP-ribosylation factor-binding protein GGA1	70625	0	2	0.253175	0	5	0.0288671
GGCT	Gamma-glutamylcyclotransferase	21236	9	20	0.0682322	1	0	0.460938
GGPS1	Geranylgeranyl pyrophosphate synthase	35042	1	4	0.245759	0	0	0.991956
GID8	Glucose-induced degradation protein 8 homolog	26805	2	2	0.931281	0	0	0.991956
GIGYF1	PERQ amino acid-rich with GYF domain-containing protein 1	115114	4	0	0.0455913	0	0	0.991956
GIGYF2	PERQ amino acid-rich with GYF domain-containing protein 2	150320	10	7	0.383164	6	5	0.746128
GINS3	DNA replication complex GINS protein PSF3	24591	2	0	0.203895	0	0	0.991956
GIPC1	PDZ domain-containing protein GIPC1	36163	6	4	0.463969	3	0	0.10741
GLG1	Golgi apparatus protein 1	138341	11	7	0.27629	9	6	0.428104
GLO1	Lactoylglutathione lyase	21006	16	18	0.912325	1	0	0.460938
GLOD4	Glyoxalase domain-containing protein 4	35192	13	28	0.0363064	3	3	0.978719
GLRX3	Glutaredoxin-3	37717	7	4	0.315556	4	2	0.430858
GLS	Glutaminase kidney isoform, mitochondrial	74316	14	15	0.977189	18	5	0.00552576
GLUD1	Glutamate dehydrogenase 1, mitochondrial	61739	42	49	0.718455	26	25	0.832591
GMFB	Glia maturation factor beta	16884	3	8	0.182101	0	0	0.991956
GMPR2	GMP reductase 2	38363	3	5	0.579351	2	2	0.982014
GMPS	GMP synthase [glutamine-hydrolyzing]	77408	66	61	0.379778	36	62	0.0114454
GNA12	Guanine nucleotide-binding protein subunit alpha-12	44450	5	0	0.0216916	0	0	0.991956
GNB1	Guanine nucleotide-binding protein G(I)/G(S)/G(T) subunit beta-1	38175	11	0	0.000259115	4	0	0.0524359
GNB2	Guanine nucleotide-binding protein G(I)/G(S)/G(T) subunit beta-2	38072	15	22	0.367114	5	0	0.025684
GNB2L1	Guanine nucleotide-binding protein subunit beta-2-like 1	35511	93	98	0.862316	63	41	0.0239515
GNE	Bifunctional UDP-N-acetylglucosamine 2-epimerase/N-acetylmannosamine kinase	80193	6	3	0.281404	2	0	0.221265
GNG12	Guanine nucleotide-binding protein G(I)/G(S)/G(O) subunit gamma-12	8120	2	2	0.931281	0	0	0.991956
GNL1	Guanine nucleotide-binding protein-like 1	69132	3	3	0.918731	5	9	0.317177
GNPDA1	Glucosamine-6-phosphate isomerase 1	32839	4	20	0.00166121	0	6	0.0144581
GNPNAT1	Glucosamine 6-phosphate N-acetyltransferase	21091	3	12	0.0301631	0	2	0.234147
GOLGA2	Golgin subfamily A member 2	113644	2	0	0.203895	2	0	0.221265
GOLGA3	Golgin subfamily A member 3	167765	6	10	0.414174	3	3	0.978719
GOLGA4	Golgin subfamily A member 4	261892	0	4	0.0660111	0	0	0.991956
GOLGB1	Golgin subfamily B member 1	377215	38	33	0.359318	30	17	0.0502768
GOLIM4	Golgi integral membrane protein 4	81888	4	4	0.907895	5	4	0.727577
GOLM1	Golgi membrane protein 1	45477	11	8	0.398495	6	6	0.971002
GOLPH3	Golgi phosphoprotein 3	34095	0	4	0.0660111	0	0	0.991956
GORASP2	Golgi reassembly-stacking protein 2	47316	15	19	0.653399	10	11	0.868189
GOSR1	Golgi SNAP receptor complex member 1	28726	3	0	0.0961434	4	0	0.0524359
GPD2	Glycerol-3-phosphate dehydrogenase, mitochondrial	81315	8	1	0.0146042	4	0	0.0524359
GPI	Glucose-6-phosphate isomerase	63375	29	37	0.507102	25	38	0.121067
GPR179	Probable G-protein coupled receptor 179	260784	2	0	0.203895	0	0	0.991956
GPR82	Probable G-protein coupled receptor 82	39037	0	2	0.253175	0	1	0.478059
GPR98	G-protein coupled receptor 98	695058	2	0	0.203895	0	0	0.991956
GPRC5A	Retinoic acid-induced protein 3	40624	12	13	0.999639	13	19	0.322354
GPS1	COP9 signalosome complex subunit 1	56106	4	5	0.845642	0	0	0.991956
GPX2	Glutathione peroxidase 2	22182	3	0	0.0961434	0	0	0.991956
GRB2	Growth factor receptor-bound protein 2	25320	6	10	0.414174	0	0	0.991956
GRHPR	Glyoxylate reductase/hydroxypyruvate reductase	36067	15	18	0.771684	6	3	0.323307
GRID2IP	Delphilin	133277	3	2	0.614615	2	1	0.601165
GRIP1	Glutamate receptor-interacting protein 1	123277	0	8	0.00464976	0	0	0.991956
GRPEL1	GrpE protein homolog 1, mitochondrial	24507	5	16	0.0262432	5	0	0.025684
GRWD1	Glutamate-rich WD repeat-containing protein 1	49787	8	11	0.617053	7	6	0.760302
GSC	Homeobox protein goosecoid	28492	2	0	0.203895	0	0	0.991956
GSK3A	Glycogen synthase kinase-3 alpha	51437	2	5	0.333967	6	4	0.523438
GSN	Gelsolin	86043	26	21	0.322481	20	34	0.068174
GSPT1	Eukaryotic peptide chain release factor GTP-binding subunit ERF3A	56348	9	13	0.514525	4	7	0.403207
GSPT2	Eukaryotic peptide chain release factor GTP-binding subunit ERF3B	69510	4	10	0.154427	6	4	0.523438
GSR	Glutathione reductase, mitochondrial	56827	4	4	0.907895	2	2	0.982014
GSS	Glutathione synthetase	52555	11	10	0.693495	13	7	0.172449
GSTK1	Glutathione S-transferase kappa 1	25611	7	8	0.923596	0	0	0.991956
GSTM3	Glutathione S-transferase Mu 3	27016	2	4	0.509253	0	0	0.991956
GSTO1	Glutathione S-transferase omega-1	27851	24	30	0.60012	10	1	0.00529524
GSTP1	Glutathione S-transferase P	23584	91	95	0.814375	29	1	1.96273e-08
GTF2B	Transcription initiation factor IIB	35346	2	0	0.203895	0	0	0.991956
GTF2F1	General transcription factor IIF subunit 1	58297	4	8	0.326748	2	5	0.295743
GTF2F2	General transcription factor IIF subunit 2	28437	3	12	0.0301631	2	2	0.982014
GTF2I	General transcription factor II-I	112859	13	5	0.0423508	11	21	0.0896756
GTF3C1	General transcription factor 3C polypeptide 1	241062	14	2	0.00131563	5	9	0.317177
GTPBP1	GTP-binding protein 1	73035	6	4	0.463969	1	5	0.125283
GUK1	Guanylate kinase	21782	2	0	0.203895	1	0	0.460938
GXYLT1	Glucoside xylosyltransferase 1	51332	18	14	0.358348	11	5	0.130489
H1F0	Histone H1.0	20863	0	10	0.00124237	0	0	0.991956
H2AFV	Histone H2A.V	13509	18	38	0.0168576	0	0	0.991956
H2AFY	Core histone macro-H2A.1	39788	8	6	0.505175	1	0	0.460938
H3F3A	Histone H3.3	15385	5	0	0.0216916	1	0	0.460938
H3F3C	Histone H3.3C	15328	3	0	0.0961434	0	0	0.991956
H6PD	GDH/6PGL endoplasmic bifunctional protein	89407	10	11	0.974144	6	14	0.0849898
HADH	Hydroxyacyl-coenzyme A dehydrogenase, mitochondrial	34350	11	30	0.00612807	6	2	0.16552
HADHA	Trifunctional enzyme subunit alpha, mitochondrial	83688	53	48	0.376351	78	56	0.043948
HADHB	Trifunctional enzyme subunit beta, mitochondrial	51579	16	24	0.313731	7	5	0.553792
HAGH	Hydroxyacylglutathione hydrolase, mitochondrial	34262	3	14	0.0114261	2	2	0.982014
HARS	Histidine--tRNA ligase, cytoplasmic	57944	9	7	0.519241	7	3	0.210178
HARS2	Probable histidine--tRNA ligase, mitochondrial	57629	5	4	0.66111	0	0	0.991956
HAT1	Histone acetyltransferase type B catalytic subunit	49880	5	3	0.432598	3	2	0.664401
HBA1	Hemoglobin subunit alpha	15314	0	2	0.253175	0	0	0.991956
HBS1L	HBS1-like protein	75939	2	5	0.333967	1	4	0.21916
HCCS	Cytochrome c-type heme lyase	31001	0	2	0.253175	0	0	0.991956
HCFC1	Host cell factor 1	210598	3	1	0.32108	0	1	0.478059
HDGF	Hepatoma-derived growth factor	26902	15	26	0.144557	15	4	0.010066
HDGFRP2	Hepatoma-derived growth factor-related protein 2	74487	0	2	0.253175	0	1	0.478059
HDHD1	Pseudouridine-5~-monophosphatase	25420	0	2	0.253175	0	0	0.991956
HDHD2	Haloacid dehalogenase-like hydrolase domain-containing protein 2	28764	4	6	0.633198	2	1	0.601165
HDHD3	Haloacid dehalogenase-like hydrolase domain-containing protein 3	28228	4	2	0.388333	2	0	0.221265
HDLBP	Vigilin	141995	32	41	0.473793	24	30	0.462244
HEATR1	HEAT repeat-containing protein 1	244382	20	14	0.213349	18	8	0.0455601
HEATR5B	HEAT repeat-containing protein 5B	226839	3	10	0.076226	2	2	0.982014
HEBP1	Heme-binding protein 1	21211	4	12	0.0681993	0	1	0.478059
HEBP2	Heme-binding protein 2	22875	14	12	0.558265	15	2	0.00106479
HECTD1	E3 ubiquitin-protein ligase HECTD1	292225	14	17	0.754439	4	2	0.430858
HECTD3	E3 ubiquitin-protein ligase HECTD3	98135	2	0	0.203895	0	0	0.991956
HECW1	E3 ubiquitin-protein ligase HECW1	180921	4	2	0.388333	0	0	0.991956
HELLS	Lymphoid-specific helicase	97700	2	0	0.203895	0	0	0.991956
HELZ2	Helicase with zinc finger domain 2	298286	2	0	0.203895	1	0	0.460938
HERC1	Probable E3 ubiquitin-protein ligase HERC1	538790	4	0	0.0455913	0	0	0.991956
HERC2	E3 ubiquitin-protein ligase HERC2	533510	5	1	0.0973209	0	1	0.478059
HERC4	Probable E3 ubiquitin-protein ligase HERC4	119913	2	2	0.931281	1	1	0.986068
HEXA	Beta-hexosaminidase subunit alpha	61158	1	2	0.670103	2	0	0.221265
HEXIM1	Protein HEXIM1	40908	2	2	0.931281	5	2	0.270486
HFM1	Probable ATP-dependent DNA helicase HFM1	163806	2	0	0.203895	0	0	0.991956
HGS	Hepatocyte growth factor-regulated tyrosine kinase substrate	86708	10	11	0.974144	5	10	0.22225
HIBADH	3-hydroxyisobutyrate dehydrogenase, mitochondrial	35728	4	12	0.0681993	1	3	0.376223
HIBCH	3-hydroxyisobutyryl-CoA hydrolase, mitochondrial	43824	6	0	0.010343	4	0	0.0524359
HID1	Protein HID1	89316	9	13	0.514525	0	9	0.00183051
HINT2	Histidine triad nucleotide-binding protein 2, mitochondrial	17219	10	12	0.816141	1	0	0.460938
HIP1R	Huntingtin-interacting protein 1-related protein	119999	3	0	0.0961434	4	0	0.0524359
HIST1H1B	Histone H1.5	22580	82	94	0.696861	33	8	5.06625e-05
HIST1H1C	Histone H1.2	21364	76	154	4.16101e-06	15	4	0.010066
HIST1H1D	Histone H1.3	22350	75	156	1.63566e-06	0	0	0.991956
HIST1H2AA	Histone H2A type 1-A	14233	20	42	0.0124651	2	1	0.601165
HIST1H2AB	Histone H2A type 1-B/E	14135	40	44	0.93742	3	9	0.0968076
HIST1H2BA	Histone H2B type 1-A	14167	9	0	0.0011298	0	0	0.991956
HIST1H2BB	Histone H2B type 1-B	13950	48	63	0.311462	15	26	0.100519
HIST1H2BC	Histone H2B type 1-C/E/F/G/I	13906	51	112	1.46549e-05	0	0	0.991956
HIST1H4A	Histone H4	11360	59	77	0.275922	8	19	0.0399238
HIST1H4G	Histone H4-like protein type G	11123	10	16	0.336989	0	0	0.991956
HIST2H3A	Histone H3.2	15445	5	8	0.508441	1	0	0.460938
HIVEP2	Transcription factor HIVEP2	271275	4	6	0.633198	2	0	0.221265
HK1	Hexokinase-1	103561	20	18	0.574696	16	14	0.67781
HK2	Hexokinase-2	103739	8	7	0.685977	9	5	0.281079
HLA-G	HLA class I histocompatibility antigen, alpha chain G	38566	0	6	0.0174636	0	0	0.991956
HLTF	Helicase-like transcription factor	114883	0	3	0.128913	0	0	0.991956
HM13	Minor histocompatibility antigen H13	41747	4	1	0.178498	1	0	0.460938
HMBS	Porphobilinogen deaminase	39534	0	2	0.253175	0	0	0.991956
HMGA1	High mobility group protein HMG-I/HMG-Y	11676	0	10	0.00124237	0	0	0.991956
HMGB1	High mobility group protein B1	25065	25	52	0.00591628	11	7	0.334596
HMGB2	High mobility group protein B2	24205	10	24	0.0296079	3	4	0.744772
HMGB3	High mobility group protein B3	23151	3	6	0.403636	0	0	0.991956
HMGCL	Hydroxymethylglutaryl-CoA lyase, mitochondrial	34816	0	2	0.253175	0	1	0.478059
HMGCS2	Hydroxymethylglutaryl-CoA synthase, mitochondrial	57148	2	0	0.203895	0	0	0.991956
HN1	Hematological and neurological expressed 1 protein	16014	6	12	0.221754	2	1	0.601165
HN1L	Hematological and neurological expressed 1-like protein	20120	5	16	0.0262432	0	0	0.991956
HNRNPA0	Heterogeneous nuclear ribonucleoprotein A0	31011	19	26	0.439415	15	2	0.00106479
HNRNPA1	Heterogeneous nuclear ribonucleoprotein A1	38860	45	80	0.00674813	44	13	2.10061e-05
HNRNPA2B1	Heterogeneous nuclear ribonucleoproteins A2/B1	37486	32	45	0.256046	43	13	3.3213e-05
HNRNPA3	Heterogeneous nuclear ribonucleoprotein A3	39799	13	11	0.553192	30	10	0.00113528
HNRNPAB	Heterogeneous nuclear ribonucleoprotein A/B	36339	10	14	0.54225	12	2	0.00623623
HNRNPC	Heterogeneous nuclear ribonucleoproteins C1/C2	33727	23	44	0.0242908	21	24	0.708306
HNRNPD	Heterogeneous nuclear ribonucleoprotein D0	38605	36	21	0.0230187	30	7	8.7212e-05
HNRNPF	Heterogeneous nuclear ribonucleoprotein F	45985	32	46	0.215855	37	44	0.495076
HNRNPH1	Heterogeneous nuclear ribonucleoprotein H	49484	58	57	0.611306	42	43	0.988559
HNRNPH3	Heterogeneous nuclear ribonucleoprotein H3	36983	17	24	0.404597	8	8	0.966842
HNRNPK	Heterogeneous nuclear ribonucleoprotein K	51230	107	133	0.28079	127	138	0.609949
HNRNPL	Heterogeneous nuclear ribonucleoprotein L	64720	15	12	0.440452	63	19	4.51936e-07
HNRNPM	Heterogeneous nuclear ribonucleoprotein M	77749	68	48	0.0232139	63	69	0.686134
HNRNPR	Heterogeneous nuclear ribonucleoprotein R	71184	34	24	0.109442	61	35	0.00587208
HNRNPU	Heterogeneous nuclear ribonucleoprotein U	91269	114	107	0.296274	117	195	2.09264e-05
HNRNPUL1	Heterogeneous nuclear ribonucleoprotein U-like protein 1	96250	15	26	0.144557	26	36	0.236925
HNRNPUL2	Heterogeneous nuclear ribonucleoprotein U-like protein 2	85622	36	24	0.0654933	32	24	0.25538
HNRPDL	Heterogeneous nuclear ribonucleoprotein D-like	46608	18	30	0.145758	12	6	0.152159
HOMER2	Homer protein homolog 2	40798	0	2	0.253175	0	2	0.234147
HP1BP3	Heterochromatin protein 1-binding protein 3	61492	2	2	0.931281	6	0	0.012608
HPCAL1	Hippocalcin-like protein 1	22427	11	12	0.987809	0	0	0.991956
HPGD	15-hydroxyprostaglandin dehydrogenase [NAD(+)]	29205	20	58	5.56779e-05	11	4	0.068804
HPRT1	Hypoxanthine-guanine phosphoribosyltransferase	24807	18	12	0.195245	5	1	0.113032
HR	Protein hairless	130060	0	2	0.253175	0	0	0.991956
HRAS	GTPase HRas	21640	2	2	0.931281	0	0	0.991956
HRES1	Putative HTLV-1-related endogenous sequence	24513	2	0	0.203895	0	0	0.991956
HRNR	Hornerin	283140	7	12	0.340803	5	12	0.103157
HRSP12	Ribonuclease UK114	14551	5	8	0.508441	1	0	0.460938
HSD11B1	Corticosteroid 11-beta-dehydrogenase isozyme 1	32629	3	0	0.0961434	2	0	0.221265
HSD17B10	3-hydroxyacyl-CoA dehydrogenase type-2	27151	20	26	0.540227	18	9	0.0769027
HSD17B11	Estradiol 17-beta-dehydrogenase 11	33278	0	10	0.00124237	0	2	0.234147
HSD17B12	Estradiol 17-beta-dehydrogenase 12	34416	12	42	0.000104244	12	9	0.491566
HSD17B4	Peroxisomal multifunctional enzyme type 2	80092	35	29	0.291184	44	41	0.676663
HSD17B8	Estradiol 17-beta-dehydrogenase 8	27316	5	6	0.876534	6	0	0.012608
HSDL2	Hydroxysteroid dehydrogenase-like protein 2	45679	4	4	0.907895	5	3	0.484186
HSF1	Heat shock factor protein 1	57545	2	0	0.203895	0	0	0.991956
HSP90AA1	Heat shock protein HSP 90-alpha	85006	318	340	0.894419	288	367	0.00465052
HSP90AA5P	Putative heat shock protein HSP 90-alpha A5	38942	0	16	2.39452e-05	0	0	0.991956
HSP90AB1	Heat shock protein HSP 90-beta	83554	314	328	0.670353	253	348	0.000279927
HSP90AB3P	Putative heat shock protein HSP 90-beta-3	68624	77	0	2.50448e-25	0	81	7.54528e-25
HSP90AB4P	Putative heat shock protein HSP 90-beta 4	58855	41	43	0.889795	21	33	0.121104
HSP90B1	Endoplasmin	92696	142	154	0.974494	154	176	0.304737
HSPA14	Heat shock 70 kDa protein 14	55478	13	9	0.307365	17	4	0.00360912
HSPA1A	Heat shock 70 kDa protein 1A/1B	70294	236	265	0.666438	156	275	2.78453e-08
HSPA1L	Heat shock 70 kDa protein 1-like	70774	132	0	7.95351e-43	51	57	0.638631
HSPA2	Heat shock-related 70 kDa protein 2	70305	83	65	0.0515624	18	19	0.920276
HSPA4	Heat shock 70 kDa protein 4	95127	99	103	0.788196	120	104	0.223113
HSPA4L	Heat shock 70 kDa protein 4L	95479	41	36	0.364471	30	30	0.937237
HSPA5	78 kDa glucose-regulated protein	72402	370	293	6.76119e-05	420	371	0.0428313
HSPA6	Heat shock 70 kDa protein 6	71484	2	86	2.79202e-22	28	26	0.73049
HSPA8	Heat shock cognate 71 kDa protein	71082	440	425	0.100044	301	408	0.0001732
HSPA9	Stress-70 protein, mitochondrial	73920	183	150	0.0120187	130	180	0.00772137
HSPB1	Heat shock protein beta-1	22839	43	16	0.000121492	31	6	1.77818e-05
HSPB11	Heat shock protein beta-11	16411	0	14	8.92056e-05	0	0	0.991956
HSPBP1	Hsp70-binding protein 1	40215	8	0	0.00236129	4	0	0.0524359
HSPD1	60 kDa heat shock protein, mitochondrial	61187	190	180	0.206938	1216	420	2.22233e-93
HSPE1	10 kDa heat shock protein, mitochondrial	10932	26	46	0.0424809	5	5	0.973325
HSPH1	Heat shock protein 105 kDa	97716	95	83	0.157616	116	90	0.0506548
HTATIP2	Oxidoreductase HTATIP2	27277	8	8	0.873664	4	1	0.201586
HTATSF1	HIV Tat-specific factor 1	86371	3	1	0.32108	3	0	0.10741
HTRA2	Serine protease HTRA2, mitochondrial	48897	3	4	0.806359	1	0	0.460938
HTT	Huntingtin	351374	23	13	0.0590801	16	7	0.056311
HUWE1	E3 ubiquitin-protein ligase HUWE1	485523	100	83	0.0755603	71	57	0.177577
HYDIN	Hydrocephalus-inducing protein homolog	581305	3	10	0.076226	0	0	0.991956
HYOU1	Hypoxia up-regulated protein 1	111494	60	91	0.0403834	45	71	0.0211557
HYPK	Huntingtin-interacting protein K	14665	3	6	0.403636	0	0	0.991956
IARS	Isoleucine--tRNA ligase, cytoplasmic	145718	43	38	0.367319	28	22	0.361208
IARS2	Isoleucine--tRNA ligase, mitochondrial	114688	29	34	0.751216	20	22	0.811141
ICT1	Peptidyl-tRNA hydrolase ICT1, mitochondrial	23858	2	6	0.21368	0	0	0.991956
IDE	Insulin-degrading enzyme	118692	18	14	0.358348	6	4	0.523438
IDH1	Isocitrate dehydrogenase [NADP] cytoplasmic	46944	25	17	0.139984	20	6	0.00491447
IDH2	Isocitrate dehydrogenase [NADP], mitochondrial	51365	6	14	0.110988	4	9	0.188877
IDH3A	Isocitrate dehydrogenase [NAD] subunit alpha, mitochondrial	40048	9	16	0.235594	3	3	0.978719
IDI1	Isopentenyl-diphosphate Delta-isomerase 1	26661	5	0	0.0216916	1	0	0.460938
IDS	Iduronate 2-sulfatase	62272	0	2	0.253175	0	1	0.478059
IFIH1	Interferon-induced helicase C domain-containing protein 1	118000	4	0	0.0455913	2	0	0.221265
IFLTD1	Intermediate filament tail domain-containing protein 1	43750	2	0	0.203895	0	0	0.991956
IFT140	Intraflagellar transport protein 140 homolog	166960	0	12	0.000332666	0	0	0.991956
IFT27	Intraflagellar transport protein 27 homolog	20765	2	0	0.203895	0	0	0.991956
IFT88	Intraflagellar transport protein 88 homolog	94839	0	2	0.253175	0	0	0.991956
IGF2BP1	Insulin-like growth factor 2 mRNA-binding protein 1	63822	24	27	0.890101	7	31	8.69672e-05
IGF2BP2	Insulin-like growth factor 2 mRNA-binding protein 2	66235	26	32	0.627008	18	40	0.00476296
IGF2BP3	Insulin-like growth factor 2 mRNA-binding protein 3	64047	27	42	0.139237	0	35	3.39495e-11
IGF2R	Cation-independent mannose-6-phosphate receptor	281155	6	3	0.281404	3	3	0.978719
IKBKAP	Elongator complex protein 1	151813	8	5	0.342753	2	7	0.112665
IL18	Interleukin-18	22611	4	0	0.0455913	0	0	0.991956
IL1RN	Interleukin-1 receptor antagonist protein	20397	2	0	0.203895	0	0	0.991956
IL4R	Interleukin-4 receptor subunit alpha	91654	3	8	0.182101	0	0	0.991956
ILF3	Interleukin enhancer-binding factor 3	95678	59	52	0.28474	42	33	0.262125
IMMT	Mitochondrial inner membrane protein	84026	11	6	0.177338	3	3	0.978719
IMP3	U3 small nucleolar ribonucleoprotein protein IMP3	21964	2	12	0.0106159	0	0	0.991956
IMPA1	Inositol monophosphatase 1	30588	14	32	0.0164485	9	6	0.428104
IMPDH1	Inosine-5~-monophosphate dehydrogenase 1	55805	5	4	0.66111	0	0	0.991956
IMPDH2	Inosine-5~-monophosphate dehydrogenase 2	56261	37	46	0.528737	34	13	0.00162256
INA	Alpha-internexin	55561	3	0	0.0961434	1	0	0.460938
INF2	Inverted formin-2	136851	46	40	0.315781	34	39	0.620763
INPP4B	Type II inositol 3,4-bisphosphate 4-phosphatase	105755	0	4	0.0660111	0	6	0.0144581
INTS1	Integrator complex subunit 1	246366	2	5	0.333967	2	4	0.462494
INTS6	Integrator complex subunit 6	100954	2	0	0.203895	1	0	0.460938
IPO4	Importin-4	120179	4	5	0.845642	4	4	0.975871
IPO5	Importin-5	125032	39	54	0.23898	29	35	0.506998
IPO7	Importin-7	120751	30	40	0.387316	25	33	0.334142
IPO9	Importin-9	116858	9	13	0.514525	6	15	0.0573353
IQGAP1	Ras GTPase-activating-like protein IQGAP1	189761	137	173	0.172383	138	149	0.633227
IQGAP2	Ras GTPase-activating-like protein IQGAP2	181036	4	9	0.226789	3	4	0.744772
IQGAP3	Ras GTPase-activating-like protein IQGAP3	185268	8	13	0.37308	4	12	0.0525529
IQSEC2	IQ motif and SEC7 domain-containing protein 2	162647	4	0	0.0455913	0	0	0.991956
IQSEC3	IQ motif and SEC7 domain-containing protein 3	129160	8	22	0.0187638	0	0	0.991956
IRF2BP2	Interferon regulatory factor 2-binding protein 2	61766	2	2	0.931281	2	4	0.462494
ISG15	Ubiquitin-like protein ISG15	17944	6	10	0.414174	0	0	0.991956
ISOC1	Isochorismatase domain-containing protein 1	32522	2	8	0.0826682	1	2	0.629371
ISOC2	Isochorismatase domain-containing protein 2, mitochondrial	22622	0	6	0.0174636	0	0	0.991956
ISY1	Pre-mRNA-splicing factor ISY1 homolog	33049	2	6	0.21368	2	1	0.601165
ITGA2	Integrin alpha-2	130468	21	13	0.112839	11	9	0.629141
ITGA3	Integrin alpha-3	117735	10	11	0.974144	8	10	0.677882
ITGA6	Integrin alpha-6	127724	42	41	0.643673	39	30	0.245463
ITGAV	Integrin alpha-V	117048	10	13	0.67115	9	9	0.964947
ITGB1	Integrin beta-1	91664	7	4	0.315556	3	3	0.978719
ITGB4	Integrin beta-4	205745	90	93	0.762722	65	65	0.908133
ITGB6	Integrin beta-6	89244	2	2	0.931281	4	2	0.430858
ITPR3	Inositol 1,4,5-trisphosphate receptor type 3	306820	21	16	0.293824	13	10	0.507647
JAGN1	Protein jagunal homolog 1	21125	0	2	0.253175	0	0	0.991956
JAK1	Tyrosine-protein kinase JAK1	135101	0	2	0.253175	0	0	0.991956
JAKMIP1	Janus kinase and microtubule-interacting protein 1	73551	2	0	0.203895	0	1	0.478059
JAKMIP3	Janus kinase and microtubule-interacting protein 3	98699	0	4	0.0660111	0	0	0.991956
JUP	Junction plakoglobin	82434	21	33	0.180258	15	28	0.0563671
KARS	Lysine--tRNA ligase	68461	54	51	0.491162	25	44	0.0277038
KCNA7	Potassium voltage-gated channel subfamily A member 7	51186	2	0	0.203895	2	0	0.221265
KCNAB2	Voltage-gated potassium channel subunit beta-2	41285	3	0	0.0961434	0	0	0.991956
KCNG4	Potassium voltage-gated channel subfamily G member 4	59835	0	4	0.0660111	0	0	0.991956
KCNU1	Potassium channel subfamily U member 1	131196	1	8	0.027112	0	0	0.991956
KCTD10	BTB/POZ domain-containing adapter for CUL3-mediated RhoA degradation protein 3	35831	0	2	0.253175	0	0	0.991956
KCTD12	BTB/POZ domain-containing protein KCTD12	35986	3	4	0.806359	1	2	0.629371
KDM1A	Lysine-specific histone demethylase 1A	93358	8	3	0.11017	4	3	0.702092
KDM3B	Lysine-specific demethylase 3B	193172	3	9	0.118765	1	4	0.21916
KDM5B	Lysine-specific demethylase 5B	178793	2	0	0.203895	0	0	0.991956
KDM5C	Lysine-specific demethylase 5C	178400	0	4	0.0660111	0	0	0.991956
KHDRBS1	KH domain-containing, RNA-binding, signal transduction-associated protein 1	48341	4	4	0.907895	3	0	0.10741
KHSRP	Far upstream element-binding protein 2	73355	38	46	0.60782	35	57	0.0281346
KIAA0196	WASH complex subunit strumpellin	135113	4	1	0.178498	6	1	0.0624631
KIAA1009	Centrosomal protein of 162 kDa	162455	2	0	0.203895	0	0	0.991956
KIAA1033	WASH complex subunit 7	137343	3	4	0.806359	0	2	0.234147
KIAA1211	Uncharacterized protein KIAA1211	137329	0	11	0.000642741	0	2	0.234147
KIAA1279	KIF1-binding protein	72453	10	6	0.257176	10	10	0.96315
KIAA1609	TLD domain-containing protein KIAA1609	51621	0	2	0.253175	0	0	0.991956
KIAA1731	Centrosomal protein KIAA1731	296713	0	2	0.253175	0	0	0.991956
KIAA1967	DBIRD complex subunit KIAA1967	103465	22	23	0.909173	22	18	0.490381
KIAA2013	Uncharacterized protein KIAA2013	69727	7	0	0.00493923	2	0	0.221265
KIDINS220	Kinase D-interacting substrate of 220 kDa	198137	3	0	0.0961434	1	0	0.460938
KIF11	Kinesin-like protein KIF11	120111	4	4	0.907895	1	3	0.376223
KIF13A	Kinesin-like protein KIF13A	203961	0	6	0.0174636	2	0	0.221265
KIF13B	Kinesin-like protein KIF13B	203974	14	12	0.558265	9	9	0.964947
KIF15	Kinesin-like protein KIF15	161030	4	2	0.388333	4	1	0.201586
KIF16B	Kinesin-like protein KIF16B	152580	4	0	0.0455913	0	0	0.991956
KIF17	Kinesin-like protein KIF17	115808	3	2	0.614615	0	0	0.991956
KIF18B	Kinesin-like protein KIF18B	95078	0	6	0.0174636	0	0	0.991956
KIF1B	Kinesin-like protein KIF1B	205774	0	2	0.253175	0	0	0.991956
KIF20A	Kinesin-like protein KIF20A	101304	4	3	0.643368	0	0	0.991956
KIF21A	Kinesin-like protein KIF21A	188374	4	2	0.388333	2	2	0.982014
KIF21B	Kinesin-like protein KIF21B	184428	3	0	0.0961434	1	0	0.460938
KIF22	Kinesin-like protein KIF22	73661	4	6	0.633198	1	2	0.629371
KIF26A	Kinesin-like protein KIF26A	197212	0	6	0.0174636	0	0	0.991956
KIF5B	Kinesin-1 heavy chain	110358	21	17	0.377896	13	15	0.751039
KIF6	Kinesin-like protein KIF6	93139	0	2	0.253175	0	0	0.991956
KLC2	Kinesin light chain 2	69291	11	3	0.0234393	2	4	0.462494
KLHL24	Kelch-like protein 24	69730	4	0	0.0455913	0	0	0.991956
KNTC1	Kinetochore-associated protein 1	253211	17	21	0.688765	12	15	0.607113
KPNA1	Importin subunit alpha-1	60963	0	2	0.253175	7	0	0.00619857
KPNA2	Importin subunit alpha-2	58204	37	41	0.914399	50	43	0.412194
KPNA3	Importin subunit alpha-3	58324	4	1	0.178498	5	0	0.025684
KPNA4	Importin subunit alpha-4	58400	4	3	0.643368	4	10	0.125361
KPNA5	Importin subunit alpha-6	61090	5	0	0.0216916	0	0	0.991956
KPNB1	Importin subunit beta-1	98420	44	55	0.473994	64	56	0.401803
KRIT1	Krev interaction trapped protein 1	85032	6	2	0.141329	5	0	0.025684
KTN1	Kinectin	156464	36	36	0.741781	25	33	0.334142
L3HYPDH	Trans-L-3-hydroxyproline dehydratase	38594	0	2	0.253175	0	0	0.991956
LACTB2	Beta-lactamase-like protein 2	33091	2	10	0.0302381	0	2	0.234147
LAD1	Ladinin-1	57187	4	4	0.907895	3	4	0.744772
LAMA3	Laminin subunit alpha-3	375888	3	0	0.0961434	0	0	0.991956
LAMA5	Laminin subunit alpha-5	412023	13	6	0.0796337	8	2	0.0584713
LAMB1	Laminin subunit beta-1	205150	1	2	0.670103	0	1	0.478059
LAMC1	Laminin subunit gamma-1	183191	13	8	0.210969	8	9	0.846958
LAMP1	Lysosome-associated membrane glycoprotein 1	45367	17	12	0.260228	10	11	0.868189
LAMP2	Lysosome-associated membrane glycoprotein 2	45503	6	4	0.463969	4	4	0.975871
LAMTOR1	Ragulator complex protein LAMTOR1	17859	0	4	0.0660111	0	0	0.991956
LANCL1	LanC-like protein 1	46024	2	0	0.203895	0	0	0.991956
LAP3	Cytosol aminopeptidase	56565	32	27	0.344915	33	8	5.06625e-05
LARP1	La-related protein 1	123833	4	3	0.643368	7	2	0.0992174
LARS	Leucine--tRNA ligase, cytoplasmic	135577	32	28	0.41594	27	22	0.436018
LARS2	Probable leucine--tRNA ligase, mitochondrial	102823	2	3	0.752754	0	1	0.478059
LASP1	LIM and SH3 domain protein 1	30116	31	60	0.00729504	13	6	0.103822
LBR	Lamin-B receptor	71102	4	2	0.388333	2	0	0.221265
LCN2	Neutrophil gelatinase-associated lipocalin	22759	8	18	0.0801347	0	0	0.991956
LCP1	Plastin-2	70858	14	10	0.320111	5	6	0.799542
LDB3	LIM domain-binding protein 3	78275	0	6	0.0174636	0	0	0.991956
LDHA	L-lactate dehydrogenase A chain	36950	188	199	0.840671	160	105	0.000387672
LDHB	L-lactate dehydrogenase B chain	36900	207	174	0.0145675	160	96	2.99133e-05
LEMD2	LEM domain-containing protein 2	57374	3	5	0.579351	7	0	0.00619857
LEPRE1	Prolyl 3-hydroxylase 1	84196	4	5	0.845642	4	6	0.567753
LETM1	LETM1 and EF-hand domain-containing protein 1, mitochondrial	83986	10	4	0.0856851	8	2	0.0584713
LGALS3	Galectin-3	26209	33	68	0.0018335	19	13	0.269098
LGALS3BP	Galectin-3-binding protein	66202	56	64	0.761453	49	64	0.193793
LGI2	Leucine-rich repeat LGI family member 2	62943	0	2	0.253175	1	0	0.460938
LGMN	Legumain	49810	4	2	0.388333	4	0	0.0524359
LIG1	DNA ligase 1	102301	5	3	0.432598	6	4	0.523438
LIMA1	LIM domain and actin-binding protein 1	85630	4	0	0.0455913	2	0	0.221265
LIMCH1	LIM and calponin homology domains-containing protein 1	122818	5	5	0.898225	0	4	0.0577624
LIMS1	LIM and senescent cell antigen-like-containing domain protein 1	39134	6	0	0.010343	0	0	0.991956
LIN7C	Protein lin-7 homolog C	21948	3	2	0.614615	0	0	0.991956
LINC00322	Uncharacterized protein encoded by LINC00322	33229	2	4	0.509253	0	1	0.478059
LINC00614	Putative uncharacterized protein encoded by LINC00614	13718	2	2	0.931281	0	0	0.991956
LIPT1	Lipoyltransferase 1, mitochondrial	43106	0	6	0.0174636	0	0	0.991956
LMAN1	Protein ERGIC-53	57798	4	5	0.845642	1	0	0.460938
LMAN2	Vesicular integral-membrane protein VIP36	40570	10	22	0.0581738	6	3	0.323307
LMAN2L	VIP36-like protein	39939	6	8	0.712803	5	0	0.025684
LMNA	Prelamin-A/C	74380	129	112	0.0904433	186	134	0.00200815
LMNB1	Lamin-B1	66653	53	30	0.00401308	30	27	0.637801
LMNB2	Lamin-B2	67802	33	28	0.347773	12	36	0.000592916
LMO7	LIM domain only protein 7	194002	2	0	0.203895	1	0	0.460938
LNPEP	Leucyl-cystinyl aminopeptidase	117787	6	3	0.281404	4	2	0.430858
LONP1	Lon protease homolog, mitochondrial	106936	20	19	0.68766	12	13	0.884916
LOXHD1	Lipoxygenase homology domain-containing protein 1	223884	2	0	0.203895	0	0	0.991956
LOXL1	Lysyl oxidase homolog 1	63794	1	10	0.00853969	0	0	0.991956
LPCAT1	Lysophosphatidylcholine acyltransferase 1	59778	2	2	0.931281	4	1	0.201586
LPCAT3	Lysophospholipid acyltransferase 5	56548	1	2	0.670103	0	0	0.991956
LPHN3	Latrophilin-3	163693	0	4	0.0660111	0	0	0.991956
LPP	Lipoma-preferred partner	67172	1	3	0.410972	0	11	0.000463262
LRBA	Lipopolysaccharide-responsive and beige-like anchor protein	321586	23	11	0.0228923	17	34	0.0210375
LRIT3	Leucine-rich repeat, immunoglobulin-like domain and transmembrane domain-containing protein 3	76008	2	0	0.203895	0	0	0.991956
LRPPRC	Leucine-rich PPR motif-containing protein, mitochondrial	159003	105	133	0.223236	72	100	0.0453715
LRRC15	Leucine-rich repeat-containing protein 15	65238	0	2	0.253175	0	0	0.991956
LRRC16A	Leucine-rich repeat-containing protein 16A	152717	3	2	0.614615	1	1	0.986068
LRRC45	Leucine-rich repeat-containing protein 45	76521	0	3	0.128913	0	0	0.991956
LRRC47	Leucine-rich repeat-containing protein 47	64043	16	17	0.957477	8	14	0.226164
LRRC57	Leucine-rich repeat-containing protein 57	27096	3	0	0.0961434	0	0	0.991956
LRRC59	Leucine-rich repeat-containing protein 59	35329	21	22	0.916363	8	1	0.0184709
LRRC8A	Leucine-rich repeat-containing protein 8A	95051	2	0	0.203895	0	0	0.991956
LRRFIP1	Leucine-rich repeat flightless-interacting protein 1	89826	19	19	0.809683	16	14	0.67781
LRRK1	Leucine-rich repeat serine/threonine-protein kinase 1	228528	0	4	0.0660111	0	0	0.991956
LRRN4	Leucine-rich repeat neuronal protein 4	80212	2	0	0.203895	0	0	0.991956
LRSAM1	E3 ubiquitin-protein ligase LRSAM1	84567	2	3	0.752754	1	0	0.460938
LSM1	U6 snRNA-associated Sm-like protein LSm1	15179	1	4	0.245759	0	0	0.991956
LSM12	Protein LSM12 homolog	21986	3	10	0.076226	0	0	0.991956
LSM2	U6 snRNA-associated Sm-like protein LSm2	10948	4	8	0.326748	3	4	0.744772
LSM4	U6 snRNA-associated Sm-like protein LSm4	15521	3	0	0.0961434	0	0	0.991956
LSS	Lanosterol synthase	84453	2	0	0.203895	1	0	0.460938
LTA4H	Leukotriene A-4 hydrolase	69912	6	3	0.281404	56	17	2.18592e-06
LTN1	E3 ubiquitin-protein ligase listerin	203103	2	2	0.931281	1	2	0.629371
LUC7L2	Putative RNA-binding protein Luc7-like 2	46970	7	7	0.88127	15	8	0.136654
LUC7L3	Luc7-like protein 3	51865	10	9	0.692023	18	21	0.681194
LXN	Latexin	25864	5	14	0.0600996	2	0	0.221265
LY86	Lymphocyte antigen 86	18362	3	0	0.0961434	0	0	0.991956
LYAR	Cell growth-regulating nucleolar protein	44071	5	10	0.267975	0	0	0.991956
LYPD3	Ly6/PLAUR domain-containing protein 3	37031	1	1	0.946744	1	2	0.629371
LYPLA1	Acyl-protein thioesterase 1	25012	4	14	0.0285459	0	0	0.991956
LYZ	Lysozyme C	16982	18	24	0.506608	21	27	0.430848
LZIC	Protein LZIC	21551	3	4	0.806359	0	0	0.991956
LZTR1	Leucine-zipper-like transcriptional regulator 1	95973	0	4	0.0660111	0	0	0.991956
MACF1	Microtubule-actin cross-linking factor 1, isoforms 1/2/3/5	843033	36	39	0.993572	25	18	0.260895
MACROD1	O-acetyl-ADP-ribose deacetylase MACROD1	36018	5	10	0.267975	3	0	0.10741
MADD	MAP kinase-activating death domain protein	184500	0	3	0.128913	0	1	0.478059
MAGED2	Melanoma-associated antigen D2	65125	0	2	0.253175	0	0	0.991956
MAGOH	Protein mago nashi homolog	17220	7	22	0.00944725	0	0	0.991956
MALT1	Mucosa-associated lymphoid tissue lymphoma translocation protein 1	93812	0	18	6.43234e-06	0	0	0.991956
MAN1B1	Endoplasmic reticulum mannosyl-oligosaccharide 1,2-alpha-mannosidase	79815	7	3	0.178108	5	5	0.973325
MAN2A1	Alpha-mannosidase 2	131742	3	8	0.182101	2	3	0.700557
MAN2C1	Alpha-mannosidase 2C1	116959	2	0	0.203895	2	0	0.221265
MANF	Mesencephalic astrocyte-derived neurotrophic factor	21156	7	26	0.00170884	1	1	0.986068
MAP2	Microtubule-associated protein 2	199980	11	22	0.0927662	4	0	0.0524359
MAP3K1	Mitogen-activated protein kinase kinase kinase 1	166522	2	0	0.203895	0	0	0.991956
MAP3K15	Mitogen-activated protein kinase kinase kinase 15	148748	4	0	0.0455913	2	1	0.601165
MAP3K4	Mitogen-activated protein kinase kinase kinase 4	183280	1	1	0.946744	0	0	0.991956
MAP3K5	Mitogen-activated protein kinase kinase kinase 5	155751	3	0	0.0961434	0	0	0.991956
MAP4	Microtubule-associated protein 4	121443	13	2	0.00244104	8	0	0.00305084
MAPKAPK2	MAP kinase-activated protein kinase 2	45938	2	0	0.203895	2	1	0.601165
MAPKBP1	Mitogen-activated protein kinase-binding protein 1	165642	2	0	0.203895	0	0	0.991956
MAPRE1	Microtubule-associated protein RP/EB family member 1	30170	4	28	2.64513e-05	0	5	0.0288671
MAPRE3	Microtubule-associated protein RP/EB family member 3	32267	5	0	0.0216916	0	0	0.991956
MARCKS	Myristoylated alanine-rich C-kinase substrate	31725	3	16	0.00418034	17	7	0.037704
MARK2	Serine/threonine-protein kinase MARK2	88255	4	4	0.907895	1	2	0.629371
MARS	Methionine--tRNA ligase, cytoplasmic	102249	7	8	0.923596	3	4	0.744772
MAT2A	S-adenosylmethionine synthase isoform type-2	44002	5	2	0.237346	4	2	0.430858
MAT2B	Methionine adenosyltransferase 2 subunit beta	37894	8	18	0.0801347	8	7	0.771512
MATR3	Matrin-3	95078	13	28	0.0363064	7	17	0.0478558
MBD5	Methyl-CpG-binding domain protein 5	161163	5	18	0.0109889	3	5	0.522598
MBOAT7	Lysophospholipid acyltransferase 7	53449	7	8	0.923596	4	0	0.0524359
MCCC1	Methylcrotonoyl-CoA carboxylase subunit alpha, mitochondrial	80935	8	3	0.11017	8	4	0.248282
MCCC2	Methylcrotonoyl-CoA carboxylase beta chain, mitochondrial	61846	7	3	0.178108	2	0	0.221265
MCF2L	Guanine nucleotide exchange factor DBS	129420	0	4	0.0660111	0	0	0.991956
MCM2	DNA replication licensing factor MCM2	102516	20	17	0.468708	15	19	0.537045
MCM3	DNA replication licensing factor MCM3	91551	46	50	0.978872	54	71	0.160376
MCM4	DNA replication licensing factor MCM4	97068	17	16	0.691822	16	9	0.15202
MCM5	DNA replication licensing factor MCM5	83031	13	19	0.408471	11	24	0.0330396
MCM6	DNA replication licensing factor MCM6	93801	30	44	0.197559	20	32	0.11355
MCM7	DNA replication licensing factor MCM7	81884	7	16	0.0942429	7	13	0.203154
MCOLN2	Mucolipin-2	67025	5	0	0.0216916	2	0	0.221265
MCTS1	Malignant T-cell-amplified sequence 1	20783	0	6	0.0174636	0	1	0.478059
MCU	Calcium uniporter protein, mitochondrial	40152	0	10	0.00124237	0	0	0.991956
MDH1	Malate dehydrogenase, cytoplasmic	36654	49	56	0.776924	34	5	9.59031e-07
MDH2	Malate dehydrogenase, mitochondrial	35959	87	150	0.000436027	68	20	1.04246e-07
MDN1	Midasin	638008	36	23	0.0473991	20	14	0.281837
MEA1	Male-enhanced antigen 1	19904	0	2	0.253175	0	0	0.991956
MECR	Trans-2-enoyl-CoA reductase, mitochondrial	40804	0	2	0.253175	0	0	0.991956
MED1	Mediator of RNA polymerase II transcription subunit 1	169342	2	3	0.752754	1	2	0.629371
MED12	Mediator of RNA polymerase II transcription subunit 12	245665	3	0	0.0961434	1	0	0.460938
MED12L	Mediator of RNA polymerase II transcription subunit 12-like protein	242855	2	0	0.203895	0	0	0.991956
MED30	Mediator of RNA polymerase II transcription subunit 30	20448	1	4	0.245759	0	0	0.991956
MED6	Mediator of RNA polymerase II transcription subunit 6	28538	1	6	0.0835055	2	1	0.601165
MED8	Mediator of RNA polymerase II transcription subunit 8	29194	5	7	0.676604	2	1	0.601165
MEIS3P2	Putative homeobox protein Meis3-like 2	39504	0	6	0.0174636	0	0	0.991956
MEMO1	Protein MEMO1	34132	3	8	0.182101	0	3	0.115969
MESDC2	LDLR chaperone MESD	26247	6	18	0.0237058	2	1	0.601165
METAP2	Methionine aminopeptidase 2	53747	2	3	0.752754	0	0	0.991956
METTL1	tRNA (guanine-N(7)-)-methyltransferase	31642	2	2	0.931281	2	0	0.221265
METTL16	Methyltransferase-like protein 16	64419	2	0	0.203895	1	0	0.460938
METTL7A	Methyltransferase-like protein 7A	28832	7	8	0.923596	3	0	0.10741
METTL9	Methyltransferase-like protein 9	36878	0	2	0.253175	0	0	0.991956
MGAT4A	Alpha-1,3-mannosyl-glycoprotein 4-beta-N-acetylglucosaminyltransferase A	61771	2	0	0.203895	1	0	0.460938
MGEA5	Bifunctional protein NCOAT	103932	0	5	0.0339154	0	2	0.234147
MGMT	Methylated-DNA--protein-cysteine methyltransferase	21931	1	8	0.027112	0	2	0.234147
MGST1	Microsomal glutathione S-transferase 1	17656	9	16	0.235594	0	0	0.991956
MIA3	Melanoma inhibitory activity protein 3	214255	4	6	0.633198	2	3	0.700557
MICAL3	Protein-methionine sulfoxide oxidase MICAL3	225297	2	0	0.203895	1	0	0.460938
MICALL1	MICAL-like protein 1	94352	3	0	0.0961434	3	0	0.10741
MICU2	Calcium uptake protein 2, mitochondrial	49919	0	2	0.253175	0	0	0.991956
MIF	Macrophage migration inhibitory factor	12647	19	36	0.0450977	1	2	0.629371
MINA	Bifunctional lysine-specific demethylase and histidyl-hydroxylase MINA	53142	3	5	0.579351	4	7	0.403207
MINK1	Misshapen-like kinase 1	150413	9	0	0.0011298	0	0	0.991956
MIPEP	Mitochondrial intermediate peptidase	81439	2	4	0.509253	0	4	0.0577624
MKI67	Antigen KI-67	360698	19	0	7.25948e-07	14	2	0.00193182
MLEC	Malectin	32405	12	36	0.00119466	7	5	0.553792
MLF1IP	Centromere protein U	47749	0	2	0.253175	0	0	0.991956
MLK4	Mitogen-activated protein kinase kinase kinase MLK4	115096	0	6	0.0174636	0	0	0.991956
MLL	Histone-lysine N-methyltransferase MLL	436058	0	6	0.0174636	0	3	0.115969
MLL2	Histone-lysine N-methyltransferase MLL2	599575	9	9	0.866505	2	0	0.221265
MLL3	Histone-lysine N-methyltransferase MLL3	548609	4	0	0.0455913	0	0	0.991956
MLLT4	Afadin	207702	19	18	0.689182	18	25	0.321778
MLTK	Mitogen-activated protein kinase kinase kinase MLT	91782	2	0	0.203895	0	0	0.991956
MLXIPL	Carbohydrate-responsive element-binding protein	93756	4	0	0.0455913	0	0	0.991956
MMGT1	Membrane magnesium transporter 1	14743	1	6	0.0835055	0	0	0.991956
MMRN2	Multimerin-2	105092	0	6	0.0174636	0	0	0.991956
MOB1A	MOB kinase activator 1A	25251	6	6	0.889413	0	0	0.991956
MOB4	MOB-like protein phocein	26546	3	0	0.0961434	0	0	0.991956
MOGS	Mannosyl-oligosaccharide glucosidase	92032	23	27	0.775487	22	30	0.304072
MON2	Protein MON2 homolog	192475	12	6	0.119899	2	3	0.700557
MOV10	Putative helicase MOV-10	114512	2	0	0.203895	1	0	0.460938
MPDU1	Mannose-P-dolichol utilization defect 1 protein	26923	0	10	0.00124237	0	0	0.991956
MPG	DNA-3-methyladenine glycosylase	33268	3	10	0.076226	0	1	0.478059
MPHOSPH10	U3 small nucleolar ribonucleoprotein protein MPP10	78930	0	4	0.0660111	0	3	0.115969
MPLKIP	M-phase-specific PLK1-interacting protein	19204	3	8	0.182101	1	0	0.460938
MPST	3-mercaptopyruvate sulfurtransferase	33463	4	4	0.907895	5	0	0.025684
MRE11A	Double-strand break repair protein MRE11A	80885	7	10	0.585331	7	15	0.101447
MROH1	Maestro heat-like repeat-containing protein family member 1	183700	1	1	0.946744	1	0	0.460938
MRPL1	39S ribosomal protein L1, mitochondrial	37136	3	16	0.00418034	3	0	0.10741
MRPL10	39S ribosomal protein L10, mitochondrial	29510	2	4	0.509253	2	0	0.221265
MRPL11	39S ribosomal protein L11, mitochondrial	20740	6	8	0.712803	1	0	0.460938
MRPL12	39S ribosomal protein L12, mitochondrial	21576	7	4	0.315556	0	0	0.991956
MRPL13	39S ribosomal protein L13, mitochondrial	20749	0	22	4.64897e-07	0	0	0.991956
MRPL15	39S ribosomal protein L15, mitochondrial	33591	2	4	0.509253	0	0	0.991956
MRPL16	39S ribosomal protein L16, mitochondrial	28506	3	0	0.0961434	0	0	0.991956
MRPL17	39S ribosomal protein L17, mitochondrial	20107	4	6	0.633198	0	0	0.991956
MRPL18	39S ribosomal protein L18, mitochondrial	20805	0	8	0.00464976	0	0	0.991956
MRPL19	39S ribosomal protein L19, mitochondrial	33820	10	32	0.00142448	8	8	0.966842
MRPL21	39S ribosomal protein L21, mitochondrial	22986	2	0	0.203895	0	0	0.991956
MRPL22	39S ribosomal protein L22, mitochondrial	23812	2	16	0.0011992	0	1	0.478059
MRPL23	39S ribosomal protein L23, mitochondrial	17781	0	8	0.00464976	0	0	0.991956
MRPL24	39S ribosomal protein L24, mitochondrial	25029	1	6	0.0835055	0	0	0.991956
MRPL27	39S ribosomal protein L27, mitochondrial	16130	0	2	0.253175	0	1	0.478059
MRPL28	39S ribosomal protein L28, mitochondrial	30271	0	6	0.0174636	0	1	0.478059
MRPL32	39S ribosomal protein L32, mitochondrial	21747	0	2	0.253175	0	0	0.991956
MRPL4	39S ribosomal protein L4, mitochondrial	34976	5	4	0.66111	3	0	0.10741
MRPL40	39S ribosomal protein L40, mitochondrial	24490	7	6	0.680602	0	0	0.991956
MRPL41	39S ribosomal protein L41, mitochondrial	15440	0	2	0.253175	0	0	0.991956
MRPL43	39S ribosomal protein L43, mitochondrial	23716	3	6	0.403636	0	0	0.991956
MRPL44	39S ribosomal protein L44, mitochondrial	37877	3	4	0.806359	2	0	0.221265
MRPL45	39S ribosomal protein L45, mitochondrial	35636	4	10	0.154427	2	0	0.221265
MRPL46	39S ribosomal protein L46, mitochondrial	31819	5	10	0.267975	2	1	0.601165
MRPL47	39S ribosomal protein L47, mitochondrial	29621	6	4	0.463969	0	0	0.991956
MRPL48	39S ribosomal protein L48, mitochondrial	24049	1	4	0.245759	1	0	0.460938
MRPL49	39S ribosomal protein L49, mitochondrial	19255	7	18	0.0456669	2	1	0.601165
MRPL50	39S ribosomal protein L50, mitochondrial	18496	4	8	0.326748	1	0	0.460938
MRPL9	39S ribosomal protein L9, mitochondrial	30414	4	6	0.633198	0	0	0.991956
MRPS18A	28S ribosomal protein S18a, mitochondrial	22526	0	4	0.0660111	0	0	0.991956
MRPS18B	28S ribosomal protein S18b, mitochondrial	29738	2	14	0.00361223	0	3	0.115969
MRPS2	28S ribosomal protein S2, mitochondrial	33534	3	0	0.0961434	2	0	0.221265
MRPS22	28S ribosomal protein S22, mitochondrial	41451	3	0	0.0961434	1	0	0.460938
MRPS23	28S ribosomal protein S23, mitochondrial	21827	15	16	0.967038	2	0	0.221265
MRPS24	28S ribosomal protein S24, mitochondrial	19357	0	2	0.253175	0	0	0.991956
MRPS26	28S ribosomal protein S26, mitochondrial	24268	2	10	0.0302381	0	0	0.991956
MRPS27	28S ribosomal protein S27, mitochondrial	47924	2	2	0.931281	11	2	0.0110774
MRPS28	28S ribosomal protein S28, mitochondrial	21014	4	10	0.154427	0	0	0.991956
MRPS34	28S ribosomal protein S34, mitochondrial	25707	7	4	0.315556	4	2	0.430858
MRPS7	28S ribosomal protein S7, mitochondrial	28248	3	2	0.614615	1	0	0.460938
MRRF	Ribosome-recycling factor, mitochondrial	29391	1	6	0.0835055	0	0	0.991956
MRTO4	mRNA turnover protein 4 homolog	27674	8	12	0.484259	4	4	0.975871
MS4A10	Membrane-spanning 4-domains subfamily A member 10	30089	0	6	0.0174636	0	0	0.991956
MSH2	DNA mismatch repair protein Msh2	105418	23	19	0.38802	19	14	0.358756
MSH3	DNA mismatch repair protein Msh3	128301	3	0	0.0961434	0	0	0.991956
MSH6	DNA mismatch repair protein Msh6	154514	47	50	0.937325	32	30	0.739877
MST4	Serine/threonine-protein kinase MST4	46814	13	8	0.210969	6	4	0.523438
MTA2	Metastasis-associated protein MTA2	75717	5	5	0.898225	3	6	0.355273
MT-ATP6	ATP synthase subunit a	24817	0	4	0.0660111	0	0	0.991956
MTCH2	Mitochondrial carrier homolog 2	33958	5	10	0.267975	2	2	0.982014
MT-CO2	Cytochrome c oxidase subunit 2	25736	7	20	0.0211718	0	0	0.991956
MT-CYB	Cytochrome b	42831	3	0	0.0961434	0	0	0.991956
MTDH	Protein LYRIC	63856	34	38	0.889508	31	45	0.130614
MTFP1	Mitochondrial fission process protein 1	18067	0	4	0.0660111	0	0	0.991956
MTHFD1	C-1-tetrahydrofolate synthase, cytoplasmic	102180	85	87	0.722474	73	68	0.589359
MTHFD1L	Monofunctional C1-tetrahydrofolate synthase, mitochondrial	106636	12	3	0.0136067	4	0	0.0524359
MTHFD2	Bifunctional methylenetetrahydrofolate dehydrogenase/cyclohydrolase, mitochondrial	38066	2	2	0.931281	2	0	0.221265
MTHFS	5-formyltetrahydrofolate cyclo-ligase	23427	6	10	0.414174	4	0	0.0524359
MTIF2	Translation initiation factor IF-2, mitochondrial	81837	5	8	0.508441	3	3	0.978719
MTM1	Myotubularin	70444	2	0	0.203895	0	0	0.991956
MTMR2	Myotubularin-related protein 2	73951	2	2	0.931281	0	0	0.991956
MTOR	Serine/threonine-protein kinase mTOR	290759	10	6	0.257176	8	4	0.248282
MTPN	Myotrophin	13066	5	8	0.508441	3	1	0.352715
MTR	Methionine synthase	141749	3	2	0.614615	1	1	0.986068
MTUS2	Microtubule-associated tumor suppressor candidate 2	150901	2	2	0.931281	0	0	0.991956
MUC5AC	Mucin-5AC (Fragments)	543092	9	3	0.0668308	2	1	0.601165
MUC5B	Mucin-5B	611584	13	4	0.0197908	8	5	0.399515
MUT	Methylmalonyl-CoA mutase, mitochondrial	83538	4	1	0.178498	4	0	0.0524359
MVP	Major vault protein	99551	98	99	0.637231	89	79	0.36786
MXRA8	Matrix-remodeling-associated protein 8	49530	4	0	0.0455913	0	0	0.991956
MYADM	Myeloid-associated differentiation marker	36072	3	0	0.0961434	0	0	0.991956
MYBBP1A	Myb-binding protein 1A	149731	14	6	0.0520451	8	4	0.248282
MYCBP	C-Myc-binding protein	11959	0	3	0.128913	0	0	0.991956
MYCBP2	Probable E3 ubiquitin-protein ligase MYCBP2	517856	12	4	0.032726	8	2	0.0584713
MYCNOS	N-cym protein	12189	0	2	0.253175	0	0	0.991956
MYH10	Myosin-10	229827	72	90	0.357768	44	104	1.14601e-06
MYH11	Myosin-11	228192	4	2	0.388333	0	0	0.991956
MYH14	Myosin-14	228701	78	73	0.378289	61	73	0.359446
MYH15	Myosin-15	225904	0	2	0.253175	0	0	0.991956
MYH9	Myosin-9	227646	369	401	0.93457	302	336	0.27547
MYL12A	Myosin regulatory light chain 12A	19851	43	86	0.000746049	10	0	0.000740781
MYL6	Myosin light polypeptide 6	17101	35	100	1.52243e-07	2	0	0.221265
MYO15A	Unconventional myosin-XV	397855	3	4	0.806359	0	0	0.991956
MYO16	Unconventional myosin-XVI	208294	14	0	2.85452e-05	0	0	0.991956
MYO18A	Unconventional myosin-XVIIIa	234168	32	32	0.755863	26	26	0.94149
MYO18B	Unconventional myosin-XVIIIb	287349	2	0	0.203895	0	0	0.991956
MYO1B	Unconventional myosin-Ib	132928	3	1	0.32108	0	1	0.478059
MYO1C	Unconventional myosin-Ic	122461	17	14	0.45399	14	10	0.394197
MYO1D	Unconventional myosin-Id	116927	3	0	0.0961434	0	0	0.991956
MYO1E	Unconventional myosin-Ie	127552	19	17	0.573135	17	14	0.556724
MYO1F	Unconventional myosin-If	125584	4	0	0.0455913	0	0	0.991956
MYO3A	Myosin-IIIa	187690	2	0	0.203895	0	0	0.991956
MYO5C	Unconventional myosin-Vc	203994	10	20	0.109672	5	15	0.0291116
MYO6	Unconventional myosin-VI	150965	9	8	0.689624	5	8	0.442883
MYO7A	Unconventional myosin-VIIa	256498	8	0	0.00236129	0	0	0.991956
MYO7B	Unconventional myosin-VIIb	243764	3	10	0.076226	0	0	0.991956
MYO9A	Unconventional myosin-IXa	294917	8	6	0.505175	2	2	0.982014
MYO9B	Unconventional myosin-IXb	244846	4	0	0.0455913	3	0	0.10741
MYOF	Myoferlin	236100	74	64	0.192529	57	45	0.198459
N4BP1	NEDD4-binding protein 1	101228	1	1	0.946744	0	0	0.991956
NAA10	N-alpha-acetyltransferase 10	26629	2	6	0.21368	4	5	0.77592
NAA15	N-alpha-acetyltransferase 15, NatA auxiliary subunit	102462	2	2	0.931281	1	1	0.986068
NAA20	N-alpha-acetyltransferase 20	20425	2	4	0.509253	0	0	0.991956
NAA25	N-alpha-acetyltransferase 25, NatB auxiliary subunit	113133	6	0	0.010343	1	0	0.460938
NAA38	N-alpha-acetyltransferase 38, NatC auxiliary subunit	10403	1	4	0.245759	0	0	0.991956
NAA50	N-alpha-acetyltransferase 50	19626	2	14	0.00361223	0	0	0.991956
NABP2	SOSS complex subunit B1	22509	1	8	0.027112	0	2	0.234147
NACA	Nascent polypeptide-associated complex subunit alpha	23384	38	80	0.000508323	36	11	0.000164931
NACAP1	Putative nascent polypeptide-associated complex subunit alpha-like protein	23306	14	36	0.00421753	10	7	0.452388
NADSYN1	Glutamine-dependent NAD(+) synthetase	80545	5	5	0.898225	7	10	0.505352
NAE1	NEDD8-activating enzyme E1 regulatory subunit	60702	2	0	0.203895	0	0	0.991956
NAGK	N-acetyl-D-glucosamine kinase	37718	3	2	0.614615	4	0	0.0524359
NAMPT	Nicotinamide phosphoribosyltransferase	55806	25	25	0.783004	22	13	0.11684
NAP1L1	Nucleosome assembly protein 1-like 1	45659	12	27	0.0307427	11	15	0.472181
NAP1L4	Nucleosome assembly protein 1-like 4	42994	20	20	0.80496	17	6	0.0194657
NAPA	Alpha-soluble NSF attachment protein	33689	11	40	0.000108788	9	14	0.329476
NAPRT1	Nicotinate phosphoribosyltransferase	58112	39	33	0.302053	26	16	0.110083
NARS	Asparagine--tRNA ligase, cytoplasmic	63798	2	0	0.203895	21	14	0.218434
NASP	Nuclear autoantigenic sperm protein	85471	8	4	0.208926	10	6	0.309585
NAT10	N-acetyltransferase 10	116569	18	13	0.269804	4	9	0.188877
NAT14	N-acetyltransferase 14	21821	0	2	0.253175	0	0	0.991956
NAV3	Neuron navigator 3	257128	2	3	0.752754	0	0	0.991956
NBAS	Neuroblastoma-amplified sequence	271708	3	1	0.32108	3	0	0.10741
NBEA	Neurobeachin	330271	3	0	0.0961434	5	0	0.025684
NBEAL1	Neurobeachin-like protein 1	310429	2	0	0.203895	0	0	0.991956
NBEAL2	Neurobeachin-like protein 2	305405	2	4	0.509253	1	2	0.629371
NCAPD2	Condensin complex subunit 1	158508	15	12	0.440452	11	4	0.068804
NCAPD3	Condensin-2 complex subunit D3	170950	5	14	0.0600996	2	10	0.0234685
NCAPG	Condensin complex subunit 3	115345	11	18	0.282894	12	16	0.490341
NCAPG2	Condensin-2 complex subunit G2	132587	0	2	0.253175	0	0	0.991956
NCBP1	Nuclear cap-binding protein subunit 1	92864	27	25	0.578547	26	43	0.0502089
NCBP2	Nuclear cap-binding protein subunit 2	18172	4	4	0.907895	0	0	0.991956
NCCRP1	F-box only protein 50	30961	7	12	0.340803	7	1	0.0341247
NCEH1	Neutral cholesterol ester hydrolase 1	46093	5	11	0.18887	5	3	0.484186
NCK1	Cytoplasmic protein NCK1	43092	2	0	0.203895	1	0	0.460938
NCKAP1	Nck-associated protein 1	130018	7	7	0.88127	3	0	0.10741
NCL	Nucleolin	76625	232	197	0.0128376	146	214	0.00067704
NCLN	Nicalin	63145	11	15	0.567799	14	4	0.0165687
NCOA7	Nuclear receptor coactivator 7	106722	3	0	0.0961434	0	0	0.991956
NCOR2	Nuclear receptor corepressor 2	275376	4	0	0.0455913	1	2	0.629371
NCSTN	Nicastrin	79103	6	4	0.463969	1	2	0.629371
NDNL2	Melanoma-associated antigen G1	34365	0	2	0.253175	0	2	0.234147
NDUFA10	NADH dehydrogenase [ubiquinone] 1 alpha subcomplex subunit 10, mitochondrial	41092	0	4	0.0660111	0	2	0.234147
NDUFA11	NADH dehydrogenase [ubiquinone] 1 alpha subcomplex subunit 11	15080	3	0	0.0961434	0	0	0.991956
NDUFA12	NADH dehydrogenase [ubiquinone] 1 alpha subcomplex subunit 12	17114	2	6	0.21368	0	0	0.991956
NDUFA13	NADH dehydrogenase [ubiquinone] 1 alpha subcomplex subunit 13	16698	5	4	0.66111	0	0	0.991956
NDUFA2	NADH dehydrogenase [ubiquinone] 1 alpha subcomplex subunit 2	11036	3	0	0.0961434	1	0	0.460938
NDUFA4	NADH dehydrogenase [ubiquinone] 1 alpha subcomplex subunit 4	9427	4	3	0.643368	0	0	0.991956
NDUFA7	NADH dehydrogenase [ubiquinone] 1 alpha subcomplex subunit 7	12608	0	6	0.0174636	0	0	0.991956
NDUFA9	NADH dehydrogenase [ubiquinone] 1 alpha subcomplex subunit 9, mitochondrial	42680	6	8	0.712803	4	0	0.0524359
NDUFAF2	Mimitin, mitochondrial	19856	0	2	0.253175	0	0	0.991956
NDUFAF3	NADH dehydrogenase [ubiquinone] 1 alpha subcomplex assembly factor 3	20578	0	2	0.253175	0	0	0.991956
NDUFB10	NADH dehydrogenase [ubiquinone] 1 beta subcomplex subunit 10	21062	4	12	0.0681993	0	0	0.991956
NDUFB11	NADH dehydrogenase [ubiquinone] 1 beta subcomplex subunit 11, mitochondrial	17374	0	4	0.0660111	0	0	0.991956
NDUFB4	NADH dehydrogenase [ubiquinone] 1 beta subcomplex subunit 4	15265	3	6	0.403636	0	0	0.991956
NDUFB5	NADH dehydrogenase [ubiquinone] 1 beta subcomplex subunit 5, mitochondrial	21750	0	4	0.0660111	0	0	0.991956
NDUFB8	NADH dehydrogenase [ubiquinone] 1 beta subcomplex subunit 8, mitochondrial	21880	0	8	0.00464976	0	0	0.991956
NDUFS1	NADH-ubiquinone oxidoreductase 75 kDa subunit, mitochondrial	80443	27	30	0.920009	31	32	0.964626
NDUFS2	NADH dehydrogenase [ubiquinone] iron-sulfur protein 2, mitochondrial	52944	7	2	0.0824056	4	0	0.0524359
NDUFS3	NADH dehydrogenase [ubiquinone] iron-sulfur protein 3, mitochondrial	30355	14	16	0.884919	12	1	0.00148482
NDUFS7	NADH dehydrogenase [ubiquinone] iron-sulfur protein 7, mitochondrial	23849	3	10	0.076226	0	0	0.991956
NDUFS8	NADH dehydrogenase [ubiquinone] iron-sulfur protein 8, mitochondrial	24218	3	8	0.182101	0	0	0.991956
NDUFV1	NADH dehydrogenase [ubiquinone] flavoprotein 1, mitochondrial	51501	4	4	0.907895	1	0	0.460938
NDUFV2	NADH dehydrogenase [ubiquinone] flavoprotein 2, mitochondrial	27676	8	22	0.0187638	0	0	0.991956
NECAP2	Adaptin ear-binding coat-associated protein 2	28453	0	6	0.0174636	0	0	0.991956
NEDD4	E3 ubiquitin-protein ligase NEDD4	150276	5	11	0.18887	3	8	0.152342
NEDD4L	E3 ubiquitin-protein ligase NEDD4-like	112204	5	5	0.898225	3	3	0.978719
NEDD8	NEDD8	9071	2	6	0.21368	0	0	0.991956
NEK9	Serine/threonine-protein kinase Nek9	108868	3	1	0.32108	3	1	0.352715
NELFE	Negative elongation factor E	43353	2	3	0.752754	5	1	0.113032
NEUROD4	Neurogenic differentiation factor 4	37326	2	0	0.203895	0	0	0.991956
NEXN	Nexilin	80886	2	0	0.203895	0	0	0.991956
NF1	Neurofibromin	322760	7	1	0.0277624	4	1	0.201586
NFASC	Neurofascin	150881	0	4	0.0660111	0	0	0.991956
NFATC4	Nuclear factor of activated T-cells, cytoplasmic 4	96189	1	3	0.410972	0	0	0.991956
NFIA	Nuclear factor 1 A-type	56343	0	2	0.253175	0	1	0.478059
NFKB2	Nuclear factor NF-kappa-B p100 subunit	97433	0	2	0.253175	0	0	0.991956
NFKBIE	NF-kappa-B inhibitor epsilon	53548	0	3	0.128913	0	0	0.991956
NFU1	NFU1 iron-sulfur cluster scaffold homolog, mitochondrial	28633	8	6	0.505175	1	0	0.460938
NFYC	Nuclear transcription factor Y subunit gamma	50587	3	0	0.0961434	0	0	0.991956
NHLRC2	NHL repeat-containing protein 2	80249	8	7	0.685977	9	13	0.430719
NHP2	H/ACA ribonucleoprotein complex subunit 2	17543	3	10	0.076226	1	0	0.460938
NHP2L1	NHP2-like protein 1	14402	2	0	0.203895	0	0	0.991956
NIF3L1	NIF3-like protein 1	42367	0	2	0.253175	0	0	0.991956
NIPBL	Nipped-B-like protein	317907	5	0	0.0216916	2	0	0.221265
NIPSNAP1	Protein NipSnap homolog 1	33481	0	6	0.0174636	0	0	0.991956
NIPSNAP3A	Protein NipSnap homolog 3A	28580	2	0	0.203895	0	0	0.991956
NIT1	Nitrilase homolog 1	36752	0	6	0.0174636	0	0	0.991956
NIT2	Omega-amidase NIT2	31007	8	58	6.54132e-10	7	17	0.0478558
NLE1	Notchless protein homolog 1	53833	3	3	0.918731	0	1	0.478059
NLN	Neurolysin, mitochondrial	81341	9	9	0.866505	3	2	0.664401
NLRC3	Protein NLRC3	115969	0	8	0.00464976	0	0	0.991956
NLRX1	NLR family member X1	108642	0	4	0.0660111	0	0	0.991956
NME1	Nucleoside diphosphate kinase A	17320	45	84	0.00260253	0	0	0.991956
NME2	Nucleoside diphosphate kinase B	17412	49	98	0.000315934	5	2	0.270486
NMNAT1	Nicotinamide mononucleotide adenylyltransferase 1	32160	0	4	0.0660111	0	1	0.478059
NMRAL1	NmrA-like family domain-containing protein 1	33515	2	6	0.21368	1	0	0.460938
NMT1	Glycylpeptide N-tetradecanoyltransferase 1	57148	9	9	0.866505	5	3	0.484186
NOA1	Nitric oxide-associated protein 1	78979	3	6	0.403636	3	3	0.978719
NOLC1	Nucleolar and coiled-body phosphoprotein 1	73602	2	6	0.21368	0	0	0.991956
NOMO1	Nodal modulator 1	135209	11	0	0.000259115	7	3	0.210178
NOMO2	Nodal modulator 2	140435	0	6	0.0174636	0	0	0.991956
NONO	Non-POU domain-containing octamer-binding protein	54345	2	4	0.509253	0	4	0.0577624
NOP14	Nucleolar protein 14	98292	5	2	0.237346	2	2	0.982014
NOP2	Putative ribosomal RNA methyltransferase NOP2	89589	34	20	0.0290459	28	29	0.956512
NOP56	Nucleolar protein 56	66448	0	3	0.128913	0	0	0.991956
NOSIP	Nitric oxide synthase-interacting protein	33685	3	4	0.806359	2	0	0.221265
NPAS4	Neuronal PAS domain-containing protein 4	87857	10	0	0.000540923	0	2	0.234147
NPAT	Protein NPAT	155600	6	0	0.010343	3	0	0.10741
NPC1	Niemann-Pick C1 protein	144868	3	2	0.614615	3	2	0.664401
NPC2	Epididymal secretory protein E1	16912	11	18	0.282894	0	0	0.991956
NPEPPS	Puromycin-sensitive aminopeptidase	103895	72	77	0.94902	65	79	0.297298
NPLOC4	Nuclear protein localization protein 4 homolog	69089	15	19	0.653399	10	18	0.149494
NPM1	Nucleophosmin	32726	26	64	0.000229963	15	31	0.0220813
NPM3	Nucleoplasmin-3	19629	2	0	0.203895	0	0	0.991956
NPTXR	Neuronal pentraxin receptor	53302	0	2	0.253175	0	0	0.991956
NQO1	NAD(P)H dehydrogenase [quinone] 1	30924	8	30	0.000684424	3	4	0.744772
NR5A2	Nuclear receptor subfamily 5 group A member 2	62090	2	0	0.203895	0	0	0.991956
NRAP	Nebulin-related-anchoring protein	198041	2	0	0.203895	0	0	0.991956
NRBP1	Nuclear receptor-binding protein	60415	0	2	0.253175	5	0	0.025684
NRD1	Nardilysin	132515	21	5	0.000731428	14	6	0.0697274
NRIP2	Nuclear receptor-interacting protein 2	31844	2	0	0.203895	0	0	0.991956
NRK	Nik-related protein kinase	179618	0	2	0.253175	0	0	0.991956
NSF	Vesicle-fusing ATPase	83055	17	13	0.350339	24	11	0.0243716
NSFL1C	NSFL1 cofactor p47	40572	3	2	0.614615	0	0	0.991956
NSMCE2	E3 SUMO-protein ligase NSE2	28274	0	2	0.253175	0	0	0.991956
NSUN2	tRNA (cytosine(34)-C(5))-methyltransferase	87214	11	9	0.539604	8	5	0.399515
NT5C	5~(3~)-deoxyribonucleotidase, cytosolic type	23611	4	4	0.907895	0	0	0.991956
NT5DC1	5~-nucleotidase domain-containing protein 1	52472	4	7	0.460596	2	4	0.462494
NT5DC3	5~-nucleotidase domain-containing protein 3	63761	2	2	0.931281	0	0	0.991956
NT5E	5~-nucleotidase	63938	5	5	0.898225	0	5	0.0288671
NTAN1	Protein N-terminal asparagine amidohydrolase	34962	2	4	0.509253	0	0	0.991956
NTMT1	N-terminal Xaa-Pro-Lys N-methyltransferase 1	25786	6	12	0.221754	5	1	0.113032
NUBPL	Iron-sulfur protein NUBPL	34311	0	2	0.253175	0	1	0.478059
NUCB1	Nucleobindin-1	53879	5	0	0.0216916	3	0	0.10741
NUCB2	Nucleobindin-2	50309	3	5	0.579351	2	1	0.601165
NUDCD1	NudC domain-containing protein 1	67554	3	5	0.579351	4	0	0.0524359
NUDCD2	NudC domain-containing protein 2	17847	0	4	0.0660111	0	0	0.991956
NUDT1	7,8-dihydro-8-oxoguanine triphosphatase	22633	2	4	0.509253	0	0	0.991956
NUDT19	Nucleoside diphosphate-linked moiety X motif 19, mitochondrial	42575	3	0	0.0961434	1	0	0.460938
NUDT21	Cleavage and polyadenylation specificity factor subunit 5	26284	23	28	0.677323	7	0	0.00619857
NUDT3	Diphosphoinositol polyphosphate phosphohydrolase 1	19642	2	2	0.931281	0	0	0.991956
NUDT4	Diphosphoinositol polyphosphate phosphohydrolase 2	20534	2	6	0.21368	0	0	0.991956
NUDT5	ADP-sugar pyrophosphatase	24613	32	76	0.000104903	27	18	0.161681
NUFIP2	Nuclear fragile X mental retardation-interacting protein 2	76132	2	2	0.931281	3	2	0.664401
NUMA1	Nuclear mitotic apparatus protein 1	239199	29	38	0.437983	22	28	0.441755
NUP107	Nuclear pore complex protein Nup107	107048	6	3	0.281404	2	1	0.601165
NUP133	Nuclear pore complex protein Nup133	129924	2	3	0.752754	2	1	0.601165
NUP153	Nuclear pore complex protein Nup153	155440	18	27	0.284295	14	22	0.207911
NUP155	Nuclear pore complex protein Nup155	156697	19	15	0.365546	9	12	0.55292
NUP160	Nuclear pore complex protein Nup160	164355	9	14	0.403007	2	4	0.462494
NUP188	Nucleoporin NUP188 homolog	198369	12	16	0.591465	3	8	0.152342
NUP205	Nuclear pore complex protein Nup205	230171	17	13	0.350339	11	9	0.629141
NUP210	Nuclear pore membrane glycoprotein 210	205895	22	22	0.795868	20	21	0.929101
NUP214	Nuclear pore complex protein Nup214	214230	8	5	0.342753	6	3	0.323307
NUP35	Nucleoporin NUP53	34887	3	2	0.614615	3	0	0.10741
NUP37	Nucleoporin Nup37	37164	1	4	0.245759	1	0	0.460938
NUP50	Nuclear pore complex protein Nup50	50543	3	0	0.0961434	1	0	0.460938
NUP85	Nuclear pore complex protein Nup85	75874	6	0	0.010343	1	0	0.460938
NUP93	Nuclear pore complex protein Nup93	93943	15	11	0.331382	10	8	0.614847
NUP98	Nuclear pore complex protein Nup98-Nup96	198597	5	4	0.66111	0	6	0.0144581
NUTF2	Nuclear transport factor 2	14649	0	4	0.0660111	0	0	0.991956
NXF1	Nuclear RNA export factor 1	70695	19	22	0.831059	6	21	0.00425214
OBSCN	Obscurin	879630	13	4	0.0197908	1	0	0.460938
OCEL1	Occludin/ELL domain-containing protein 1	29613	0	2	0.253175	0	0	0.991956
OCIAD1	OCIA domain-containing protein 1	27797	2	8	0.0826682	0	1	0.478059
OCIAD2	OCIA domain-containing protein 2	17296	4	4	0.907895	3	1	0.352715
OGDH	2-oxoglutarate dehydrogenase, mitochondrial	117059	34	42	0.565613	21	26	0.514038
OPA1	Dynamin-like 120 kDa protein, mitochondrial	112131	7	0	0.00493923	1	15	0.000289117
OPHN1	Oligophrenin-1	92267	2	4	0.509253	0	0	0.991956
OPLAH	5-oxoprolinase	138739	2	4	0.509253	0	3	0.115969
OR13H1	Olfactory receptor 13H1	35140	2	0	0.203895	0	0	0.991956
OSBP	Oxysterol-binding protein 1	90220	14	12	0.558265	10	15	0.351128
OSBPL3	Oxysterol-binding protein-related protein 3	102130	1	1	0.946744	2	2	0.982014
OSBPL8	Oxysterol-binding protein-related protein 8	101759	0	2	0.253175	0	3	0.115969
OSTC	Oligosaccharyltransferase complex subunit OSTC	16943	2	2	0.931281	0	0	0.991956
OSTF1	Osteoclast-stimulating factor 1	23958	10	12	0.816141	5	1	0.113032
OTOA	Otoancorin	129615	0	3	0.128913	0	0	0.991956
OTUB1	Ubiquitin thioesterase OTUB1	31512	21	56	0.000214912	12	11	0.799851
OTUD6B	OTU domain-containing protein 6B	34040	2	2	0.931281	2	0	0.221265
OVCA2	Ovarian cancer-associated gene 2 protein	24760	9	8	0.689624	0	1	0.478059
OXR1	Oxidation resistance protein 1	98480	2	1	0.562287	1	1	0.986068
OXSR1	Serine/threonine-protein kinase OSR1	58307	6	6	0.889413	0	0	0.991956
P4HA1	Prolyl 4-hydroxylase subunit alpha-1	61334	2	4	0.509253	2	1	0.601165
P4HA2	Prolyl 4-hydroxylase subunit alpha-2	61301	3	4	0.806359	2	5	0.295743
P4HB	Protein disulfide-isomerase	57515	60	59	0.607427	54	61	0.588105
PA2G4	Proliferation-associated protein 2G4	44129	12	15	0.716087	13	4	0.026973
PABPC1	Polyadenylate-binding protein 1	70854	81	73	0.261516	32	74	6.00274e-05
PABPC3	Polyadenylate-binding protein 3	70258	0	2	0.253175	0	0	0.991956
PABPC4	Polyadenylate-binding protein 4	71080	19	11	0.0971767	23	8	0.00577187
PABPC5	Polyadenylate-binding protein 5	43673	0	4	0.0660111	0	0	0.991956
PABPN1	Polyadenylate-binding protein 2	32863	2	0	0.203895	2	0	0.221265
PACSIN3	Protein kinase C and casein kinase substrate in neurons protein 3	48829	4	2	0.388333	1	0	0.460938
PADI1	Protein-arginine deiminase type-1	75463	2	5	0.333967	0	3	0.115969
PAFAH1B1	Platelet-activating factor acetylhydrolase IB subunit alpha	47208	1	1	0.946744	2	2	0.982014
PAFAH1B2	Platelet-activating factor acetylhydrolase IB subunit beta	25740	4	18	0.00442527	2	0	0.221265
PAFAH1B3	Platelet-activating factor acetylhydrolase IB subunit gamma	25848	4	10	0.154427	4	3	0.702092
PAICS	Multifunctional protein ADE2	47790	24	32	0.440805	28	27	0.834386
PAIP2	Polyadenylate-binding protein-interacting protein 2	15041	0	2	0.253175	0	0	0.991956
PAK2	Serine/threonine-protein kinase PAK 2	58327	5	0	0.0216916	26	2	1.15163e-06
PAM16	Mitochondrial import inner membrane translocase subunit TIM16	13825	2	6	0.21368	1	1	0.986068
PAPPA2	Pappalysin-2	203614	3	0	0.0961434	0	0	0.991956
PAPSS1	Bifunctional 3~-phosphoadenosine 5~-phosphosulfate synthase 1	71631	5	3	0.432598	0	0	0.991956
PARD3	Partitioning defective 3 homolog	151935	0	2	0.253175	0	0	0.991956
PARG	Poly(ADP-ribose) glycohydrolase	112535	0	4	0.0660111	0	0	0.991956
PARK7	Protein DJ-1	20062	16	52	3.60361e-05	1	5	0.125283
PARP1	Poly [ADP-ribose] polymerase 1	113811	27	27	0.774876	19	17	0.696394
PARP14	Poly [ADP-ribose] polymerase 14	204852	2	0	0.203895	0	0	0.991956
PARP4	Poly [ADP-ribose] polymerase 4	194582	38	36	0.572114	38	29	0.239579
PBDC1	Protein PBDC1	26171	5	4	0.66111	5	0	0.025684
PC	Pyruvate carboxylase, mitochondrial	130293	5	2	0.237346	3	0	0.10741
PCBD1	Pterin-4-alpha-carbinolamine dehydratase	12057	11	20	0.16596	4	3	0.702092
PCBP1	Poly(rC)-binding protein 1	37987	48	45	0.494382	36	25	0.138901
PCBP2	Poly(rC)-binding protein 2	38955	23	20	0.478816	14	8	0.191402
PCBP4	Poly(rC)-binding protein 4	41881	0	6	0.0174636	0	0	0.991956
PCCA	Propionyl-CoA carboxylase alpha chain, mitochondrial	80635	17	7	0.0265059	9	3	0.0832987
PCCB	Propionyl-CoA carboxylase beta chain, mitochondrial	58843	9	5	0.234966	7	1	0.0341247
PCDH1	Protocadherin-1	115015	9	3	0.0668308	4	2	0.430858
PCDH20	Protocadherin-20	102439	0	2	0.253175	0	0	0.991956
PCDHGB2	Protocadherin gamma-B2	101326	3	4	0.806359	1	1	0.986068
PCIF1	Phosphorylated CTD-interacting factor 1	81582	2	10	0.0302381	0	0	0.991956
PCM1	Pericentriolar material 1 protein	230046	3	0	0.0961434	2	0	0.221265
PCMT1	Protein-L-isoaspartate(D-aspartate) O-methyltransferase	24807	10	30	0.00317587	1	0	0.460938
PCNA	Proliferating cell nuclear antigen	29111	20	84	1.124e-09	17	20	0.670979
PCNP	PEST proteolytic signal-containing nuclear protein	18925	6	20	0.0102794	0	0	0.991956
PCNT	Pericentrin	380828	0	2	0.253175	0	0	0.991956
PCSK5	Proprotein convertase subtilisin/kexin type 5	218123	0	4	0.0660111	0	0	0.991956
PCYOX1	Prenylcysteine oxidase 1	57039	2	4	0.509253	0	0	0.991956
PDAP1	28 kDa heat- and acid-stable phosphoprotein	20630	10	18	0.197361	9	3	0.0832987
PDCD10	Programmed cell death protein 10	24701	15	20	0.545995	4	1	0.201586
PDCD11	Protein RRP5 homolog	209939	7	6	0.680602	4	5	0.77592
PDCD4	Programmed cell death protein 4	52134	7	8	0.923596	4	3	0.702092
PDCD5	Programmed cell death protein 5	14285	5	10	0.267975	3	3	0.978719
PDCD6	Programmed cell death protein 6	21925	3	20	0.000516376	0	1	0.478059
PDCD6IP	Programmed cell death 6-interacting protein	96590	16	19	0.787854	16	14	0.67781
PDCL3	Phosducin-like protein 3	27728	2	16	0.0011992	0	1	0.478059
PDDC1	Parkinson disease 7 domain-containing protein 1	23811	2	0	0.203895	0	0	0.991956
PDE6B	Rod cGMP-specific 3~,5~-cyclic phosphodiesterase subunit beta	99533	2	0	0.203895	0	0	0.991956
PDE6D	Retinal rod rhodopsin-sensitive cGMP 3~,5~-cyclic phosphodiesterase subunit delta	17534	0	2	0.253175	0	0	0.991956
PDF	Peptide deformylase, mitochondrial	27470	2	0	0.203895	0	0	0.991956
PDHB	Pyruvate dehydrogenase E1 component subunit beta, mitochondrial	39575	7	6	0.680602	4	1	0.201586
PDHX	Pyruvate dehydrogenase protein X component, mitochondrial	54350	6	2	0.141329	3	0	0.10741
PDIA3	Protein disulfide-isomerase A3	57146	90	66	0.0163203	67	57	0.31366
PDIA4	Protein disulfide-isomerase A4	73229	131	77	1.62238e-05	168	118	0.00175198
PDIA6	Protein disulfide-isomerase A6	48520	25	28	0.900455	27	20	0.279296
PDLIM1	PDZ and LIM domain protein 1	36528	8	16	0.154662	4	4	0.975871
PDLIM5	PDZ and LIM domain protein 5	65102	18	9	0.0550444	29	16	0.0457369
PDLIM7	PDZ and LIM domain protein 7	50928	9	11	0.794686	7	3	0.210178
PDP1	[Pyruvate dehydrogenase [acetyl-transferring]]-phosphatase 1, mitochondrial	61624	0	3	0.128913	0	0	0.991956
PDPR	Pyruvate dehydrogenase phosphatase regulatory subunit, mitochondrial	100156	10	4	0.0856851	6	4	0.523438
PDS5A	Sister chromatid cohesion protein PDS5 homolog A	152274	15	7	0.0616311	6	6	0.971002
PDS5B	Sister chromatid cohesion protein PDS5 homolog B	165818	11	19	0.218065	7	11	0.380306
PDSS2	Decaprenyl-diphosphate synthase subunit 2	44470	2	0	0.203895	0	0	0.991956
PDXDC1	Pyridoxal-dependent decarboxylase domain-containing protein 1	87565	10	6	0.257176	6	6	0.971002
PDXK	Pyridoxal kinase	35330	8	20	0.0395896	8	4	0.248282
PDZD2	PDZ domain-containing protein 2	304148	4	0	0.0455913	1	1	0.986068
PEBP1	Phosphatidylethanolamine-binding protein 1	21171	20	54	0.00024125	6	9	0.47645
PELP1	Proline-, glutamic acid- and leucine-rich protein 1	120879	4	3	0.643368	4	0	0.0524359
PEO1	Twinkle protein, mitochondrial	77667	0	4	0.0660111	0	0	0.991956
PEPD	Xaa-Pro dipeptidase	55346	16	12	0.341399	21	14	0.218434
PES1	Pescadillo homolog	68401	4	4	0.907895	0	4	0.0577624
PEX1	Peroxisome biogenesis factor 1	143892	0	10	0.00124237	0	0	0.991956
PEX14	Peroxisomal membrane protein PEX14	41293	4	4	0.907895	0	3	0.115969
PFAS	Phosphoribosylformylglycinamidine synthase	146297	9	14	0.403007	6	9	0.47645
PFDN1	Prefoldin subunit 1	14210	2	0	0.203895	0	0	0.991956
PFDN2	Prefoldin subunit 2	16705	3	12	0.0301631	0	3	0.115969
PFDN4	Prefoldin subunit 4	15428	5	10	0.267975	2	2	0.982014
PFDN5	Prefoldin subunit 5	17385	3	8	0.182101	3	3	0.978719
PFDN6	Prefoldin subunit 6	14582	1	8	0.027112	0	0	0.991956
PFKFB2	6-phosphofructo-2-kinase/fructose-2,6-bisphosphatase 2	58990	2	0	0.203895	1	0	0.460938
PFKL	6-phosphofructokinase, liver type	85762	9	5	0.234966	9	0	0.00150284
PFKM	6-phosphofructokinase, muscle type	85984	4	1	0.178498	4	2	0.430858
PFKP	6-phosphofructokinase type C	86454	10	13	0.67115	8	21	0.0183198
PFN1	Profilin-1	15225	62	134	3.23258e-06	16	13	0.546269
PFN2	Profilin-2	15388	8	12	0.484259	1	1	0.986068
PGAM1	Phosphoglycerate mutase 1	28918	16	36	0.0122564	17	3	0.00121129
PGAM5	Serine/threonine-protein phosphatase PGAM5, mitochondrial	32232	3	14	0.0114261	0	3	0.115969
PGD	6-phosphogluconate dehydrogenase, decarboxylating	53619	25	22	0.483738	21	16	0.381927
PGK1	Phosphoglycerate kinase 1	45014	16	13	0.447674	30	8	0.000224063
PGLS	6-phosphogluconolactonase	27832	21	36	0.0912074	11	0	0.000365337
PGM1	Phosphoglucomutase-1	61734	22	20	0.576893	54	28	0.002986
PGM2	Phosphoglucomutase-2	68796	10	5	0.157458	0	3	0.115969
PGP	Phosphoglycolate phosphatase	34462	9	16	0.235594	7	0	0.00619857
PGRMC1	Membrane-associated progesterone receptor component 1	21785	13	22	0.201242	3	3	0.978719
PGRMC2	Membrane-associated progesterone receptor component 2	23875	14	14	0.835482	5	0	0.025684
PHB	Prohibitin	29861	22	42	0.0283161	14	7	0.120574
PHB2	Prohibitin-2	33296	43	78	0.00563007	37	0	4.03996e-12
PHF5A	PHD finger-like domain-containing protein 5A	13147	4	6	0.633198	1	0	0.460938
PHGDH	D-3-phosphoglycerate dehydrogenase	57356	33	37	0.880739	39	22	0.0243347
PI4K2A	Phosphatidylinositol 4-kinase type 2-alpha	54421	1	1	0.946744	0	0	0.991956
PI4KA	Phosphatidylinositol 4-kinase alpha	233622	3	0	0.0961434	0	0	0.991956
PIAS2	E3 SUMO-protein ligase PIAS2	69166	0	2	0.253175	0	0	0.991956
PIEZO1	Piezo-type mechanosensitive ion channel component 1	290038	5	8	0.508441	2	0	0.221265
PIGU	Phosphatidylinositol glycan anchor biosynthesis class U protein	50393	1	2	0.670103	0	0	0.991956
PIH1D1	PIH1 domain-containing protein 1	32534	2	0	0.203895	0	0	0.991956
PIK3C2A	Phosphatidylinositol 4-phosphate 3-kinase C2 domain-containing subunit alpha	192156	10	11	0.974144	5	9	0.317177
PIK3C2B	Phosphatidylinositol 4-phosphate 3-kinase C2 domain-containing subunit beta	186817	0	4	0.0660111	0	4	0.0577624
PIK3R4	Phosphoinositide 3-kinase regulatory subunit 4	154414	2	1	0.562287	0	0	0.991956
PIN1	Peptidyl-prolyl cis-trans isomerase NIMA-interacting 1	18357	0	6	0.0174636	0	2	0.234147
PIN4	Peptidyl-prolyl cis-trans isomerase NIMA-interacting 4	13867	1	8	0.027112	1	2	0.629371
PITPNA	Phosphatidylinositol transfer protein alpha isoform	32034	8	24	0.00857542	10	0	0.000740781
PITPNB	Phosphatidylinositol transfer protein beta isoform	31825	14	26	0.100383	5	1	0.113032
PKD2L1	Polycystic kidney disease 2-like 1 protein	92665	3	10	0.076226	0	0	0.991956
PKHD1	Fibrocystin	452402	0	4	0.0660111	1	0	0.460938
PKM	Pyruvate kinase isozymes M1/M2	58470	663	574	0.00010141	1089	809	6.17014e-12
PKN2	Serine/threonine-protein kinase N2	112820	8	2	0.0472262	5	2	0.270486
PKP1	Plakophilin-1	84119	0	3	0.128913	0	2	0.234147
PKP3	Plakophilin-3	87485	2	5	0.333967	1	5	0.125283
PLA2G16	HRAS-like suppressor 3	18051	2	10	0.0302381	0	0	0.991956
PLA2G4A	Cytosolic phospholipase A2	85697	1	2	0.670103	4	5	0.77592
PLA2G4B	Cytosolic phospholipase A2 beta	89061	3	4	0.806359	1	0	0.460938
PLAT	Tissue-type plasminogen activator	65084	12	10	0.547057	17	9	0.108881
PLBD1	Phospholipase B-like 1	63539	5	1	0.0973209	3	0	0.10741
PLCB3	1-phosphatidylinositol 4,5-bisphosphate phosphodiesterase beta-3	139511	16	17	0.957477	9	11	0.69609
PLCG1	1-phosphatidylinositol 4,5-bisphosphate phosphodiesterase gamma-1	149843	0	2	0.253175	0	0	0.991956
PLCG2	1-phosphatidylinositol 4,5-bisphosphate phosphodiesterase gamma-2	149066	0	4	0.0660111	0	0	0.991956
PLD3	Phospholipase D3	55161	2	0	0.203895	1	0	0.460938
PLD5	Inactive phospholipase D5	62053	3	0	0.0961434	1	0	0.460938
PLEC	Plectin	533462	441	371	0.000376904	342	373	0.374012
PLEKHA5	Pleckstrin homology domain-containing family A member 5	128012	2	0	0.203895	1	0	0.460938
PLEKHF2	Pleckstrin homology domain-containing family F member 2	28482	0	2	0.253175	0	0	0.991956
PLIN3	Perilipin-3	47246	3	8	0.182101	0	9	0.00183051
PLIN4	Perilipin-4	135204	5	1	0.0973209	3	2	0.664401
PLOD1	Procollagen-lysine,2-oxoglutarate 5-dioxygenase 1	84068	2	6	0.21368	2	7	0.112665
PLOD2	Procollagen-lysine,2-oxoglutarate 5-dioxygenase 2	85373	1	1	0.946744	1	10	0.00647618
PLOD3	Procollagen-lysine,2-oxoglutarate 5-dioxygenase 3	85302	7	3	0.178108	8	4	0.248282
PLRG1	Pleiotropic regulator 1	57535	2	2	0.931281	0	3	0.115969
PLS1	Plastin-1	70608	43	23	0.00550818	18	26	0.259191
PLS3	Plastin-3	71324	22	14	0.120132	7	5	0.553792
PLXNA3	Plexin-A3	211181	2	0	0.203895	0	0	0.991956
PLXNA4	Plexin-A4	215819	2	0	0.203895	0	0	0.991956
PLXNB2	Plexin-B2	207734	10	10	0.859724	8	6	0.578101
PM20D2	Peptidase M20 domain-containing protein 2	48118	0	3	0.128913	0	1	0.478059
PMEPA1	Transmembrane prostate androgen-induced protein	32065	0	3	0.128913	0	0	0.991956
PMM2	Phosphomannomutase 2	28424	12	20	0.238267	12	2	0.00623623
PMPCA	Mitochondrial-processing peptidase subunit alpha	58766	8	10	0.770768	4	3	0.702092
PMPCB	Mitochondrial-processing peptidase subunit beta	55107	6	6	0.889413	4	5	0.77592
PMVK	Phosphomevalonate kinase	22166	2	4	0.509253	0	0	0.991956
PNN	Pinin	81679	3	0	0.0961434	1	0	0.460938
PNP	Purine nucleoside phosphorylase	32346	15	54	7.28506e-06	8	10	0.677882
PNPO	Pyridoxine-5~-phosphate oxidase	30330	7	12	0.340803	3	0	0.10741
PNPT1	Polyribonucleotide nucleotidyltransferase 1, mitochondrial	86524	23	28	0.677323	20	35	0.0521619
PODXL	Podocalyxin	59055	7	7	0.88127	4	3	0.702092
POLA1	DNA polymerase alpha catalytic subunit	167575	4	5	0.845642	4	4	0.975871
POLD1	DNA polymerase delta catalytic subunit	125035	11	3	0.0234393	4	1	0.201586
POLD2	DNA polymerase delta subunit 2	51916	1	4	0.245759	1	2	0.629371
POLDIP2	Polymerase delta-interacting protein 2	42261	3	0	0.0961434	1	0	0.460938
POLDIP3	Polymerase delta-interacting protein 3	46317	10	10	0.859724	6	2	0.16552
POLE	DNA polymerase epsilon catalytic subunit A	264031	2	3	0.752754	1	1	0.986068
POLR1A	DNA-directed RNA polymerase I subunit RPA1	196683	10	11	0.974144	8	9	0.846958
POLR2A	DNA-directed RNA polymerase II subunit RPB1	218408	9	10	0.959125	11	14	0.590813
POLR2B	DNA-directed RNA polymerase II subunit RPB2	135236	6	6	0.889413	4	2	0.430858
POLR2C	DNA-directed RNA polymerase II subunit RPB3	31783	8	8	0.873664	4	0	0.0524359
POLR2D	DNA-directed RNA polymerase II subunit RPB4	16425	3	4	0.806359	2	0	0.221265
POLR2E	DNA-directed RNA polymerases I, II, and III subunit RPABC1	24665	3	8	0.182101	0	1	0.478059
POLR2G	DNA-directed RNA polymerase II subunit RPB7	19465	0	4	0.0660111	0	0	0.991956
POLR2H	DNA-directed RNA polymerases I, II, and III subunit RPABC3	17200	4	6	0.633198	3	1	0.352715
POLR3A	DNA-directed RNA polymerase III subunit RPC1	157537	0	2	0.253175	0	2	0.234147
POMP	Proteasome maturation protein	15846	2	2	0.931281	1	1	0.986068
POP1	Ribonucleases P/MRP protein subunit POP1	116346	0	3	0.128913	2	0	0.221265
POP7	Ribonuclease P protein subunit p20	15765	0	2	0.253175	0	0	0.991956
POR	NADPH--cytochrome P450 reductase	77097	12	21	0.183716	10	22	0.0397935
POTEA	POTE ankyrin domain family member A	56907	0	2	0.253175	0	1	0.478059
POTEE	POTE ankyrin domain family member E	122960	22	0	8.03201e-08	25	0	1.8857e-08
POU2F1	POU domain, class 2, transcription factor 1	76539	1	4	0.245759	2	3	0.700557
PPA1	Inorganic pyrophosphatase	33116	40	92	3.60282e-05	27	9	0.0020475
PPA2	Inorganic pyrophosphatase 2, mitochondrial	38433	9	20	0.0682322	4	0	0.0524359
PPARG	Peroxisome proliferator-activated receptor gamma	58190	0	2	0.253175	0	0	0.991956
PPAT	Amidophosphoribosyltransferase	58197	25	16	0.100328	18	13	0.345875
PPCS	Phosphopantothenate--cysteine ligase	34005	9	2	0.0266771	3	0	0.10741
PPFIA1	Liprin-alpha-1	136265	2	0	0.203895	1	0	0.460938
PPFIBP1	Liprin-beta-1	114523	3	0	0.0961434	0	0	0.991956
PPIA	Peptidyl-prolyl cis-trans isomerase A	18240	69	90	0.239716	9	11	0.69609
PPIAL4G	Peptidyl-prolyl cis-trans isomerase A-like 4G	18394	0	4	0.0660111	0	0	0.991956
PPIB	Peptidyl-prolyl cis-trans isomerase B	23799	41	98	9.03016e-06	5	9	0.317177
PPIC	Peptidyl-prolyl cis-trans isomerase C	22877	2	4	0.509253	0	0	0.991956
PPIF	Peptidyl-prolyl cis-trans isomerase F, mitochondrial	22382	4	18	0.00442527	0	0	0.991956
PPIH	Peptidyl-prolyl cis-trans isomerase H	19493	5	12	0.13087	0	1	0.478059
PPIL3	Peptidyl-prolyl cis-trans isomerase-like 3	18383	0	2	0.253175	0	0	0.991956
PPIP5K2	Inositol hexakisphosphate and diphosphoinositol-pentakisphosphate kinase 2	141660	2	0	0.203895	0	0	0.991956
PPL	Periplakin	205193	52	52	0.692718	40	38	0.753037
PPM1F	Protein phosphatase 1F	50001	3	0	0.0961434	2	0	0.221265
PPM1G	Protein phosphatase 1G	59956	12	16	0.591465	19	14	0.358756
PPP1CA	Serine/threonine-protein phosphatase PP1-alpha catalytic subunit	38253	29	25	0.409064	11	21	0.0896756
PPP1CC	Serine/threonine-protein phosphatase PP1-gamma catalytic subunit	37725	27	0	2.05139e-09	6	0	0.012608
PPP1R12A	Protein phosphatase 1 regulatory subunit 12A	115610	9	0	0.0011298	5	0	0.025684
PPP1R21	Protein phosphatase 1 regulatory subunit 21	88827	0	2	0.253175	0	0	0.991956
PPP1R35	Protein phosphatase 1 regulatory subunit 35	28124	6	5	0.672739	2	0	0.221265
PPP1R37	Protein phosphatase 1 regulatory subunit 37	75451	0	2	0.253175	0	0	0.991956
PPP1R7	Protein phosphatase 1 regulatory subunit 7	41678	4	5	0.845642	4	4	0.975871
PPP2CA	Serine/threonine-protein phosphatase 2A catalytic subunit alpha isoform	36164	26	30	0.811059	19	0	1.29222e-06
PPP2R1A	Serine/threonine-protein phosphatase 2A 65 kDa regulatory subunit A alpha isoform	66065	8	2	0.0472262	15	6	0.0461588
[truncated: 1,086 more rows]
